# Supplementary material for: Enzymatic synthesis of amlodipine amides and evaluation of their anti-Trypanosoma cruziactivity
Source: Royal Society of Chemistry journal article supplement (doi:10.1039/d2ob02271k), 2023-01-01

## Enzymatic synthesis of amlodipine amides and evaluation of their anti-*Trypanosoma cruzi* activity

Orlando G. Elso,<sup>a</sup> Augusto E. Bivona,<sup>b,c</sup> Rocío Cenizo,<sup>b,c</sup> Emilio L. Malchiodi<sup>b,c</sup> and  
Guadalupe García Liñares<sup>a\*</sup>

<sup>a</sup>Laboratorio de Biocatálisis. Departamento de Química Orgánica y UMYMFOR, Facultad de Ciencias Exactas y Naturales, Universidad de Buenos Aires-CONICET, Ciudad Universitaria, Pabellón 2, piso 3, C1428EGA Buenos Aires, Argentina.

<sup>b</sup>Instituto de Microbiología y Parasitología Médica (IMPam), Universidad de Buenos Aires-CONICET, Paraguay 2155, piso 13, Buenos Aires, Argentina.

<sup>c</sup>Instituto de Estudios de la Inmunidad Humoral (IDEHU), Universidad de Buenos Aires-CONICET, Junín 1113, piso 4, Buenos Aires, Argentina.

e-mail: [linares@qo.fcen.uba.ar](mailto:linares@qo.fcen.uba.ar); [pupegarcialinares@gmail.com](mailto:pupegarcialinares@gmail.com)

### Supplementary material – Table of Contents

|     | <sup>1</sup> H and <sup>13</sup> C-NMR spectra | Page    |
|-----|------------------------------------------------|---------|
| 1.  | Amlodipine                                     | S2-S3   |
| 2.  | Compound <b>4a</b>                             | S4-S5   |
| 3.  | Compound <b>4b</b>                             | S6-S7   |
| 4.  | Compound <b>4c</b>                             | S8-S9   |
| 5.  | Compound <b>4d</b>                             | S10-S11 |
| 6.  | Compound <b>4e</b>                             | S12-S13 |
| 7.  | Compound <b>4f</b>                             | S14-S15 |
| 8.  | Compound <b>4g</b>                             | S16-S17 |
| 9.  | Compound <b>4h</b>                             | S18-S19 |
| 10. | Compound <b>4i</b>                             | S20-S21 |
| 11. | Compound <b>4j</b>                             | S22-S23 |
| 12. | Compound <b>4k</b>                             | S24-S25 |
| 13. | Compound <b>4l</b>                             | S26-S27 |
| 14. | Compound <b>4m</b>                             | S28-S29 |
| 15. | Compound <b>5a</b>                             | S30-S31 |
| 16. | Compound <b>5b</b>                             | S32-S33 |
| 17. | Compound <b>5c</b>                             | S34-S35 |
| 18. | Compound <b>5d</b>                             | S36-S37 |
| 19. | Compound <b>5e</b>                             | S38-S39 |
| 20. | Compound <b>5f</b>                             | S40-S41 |

# Amlodipine

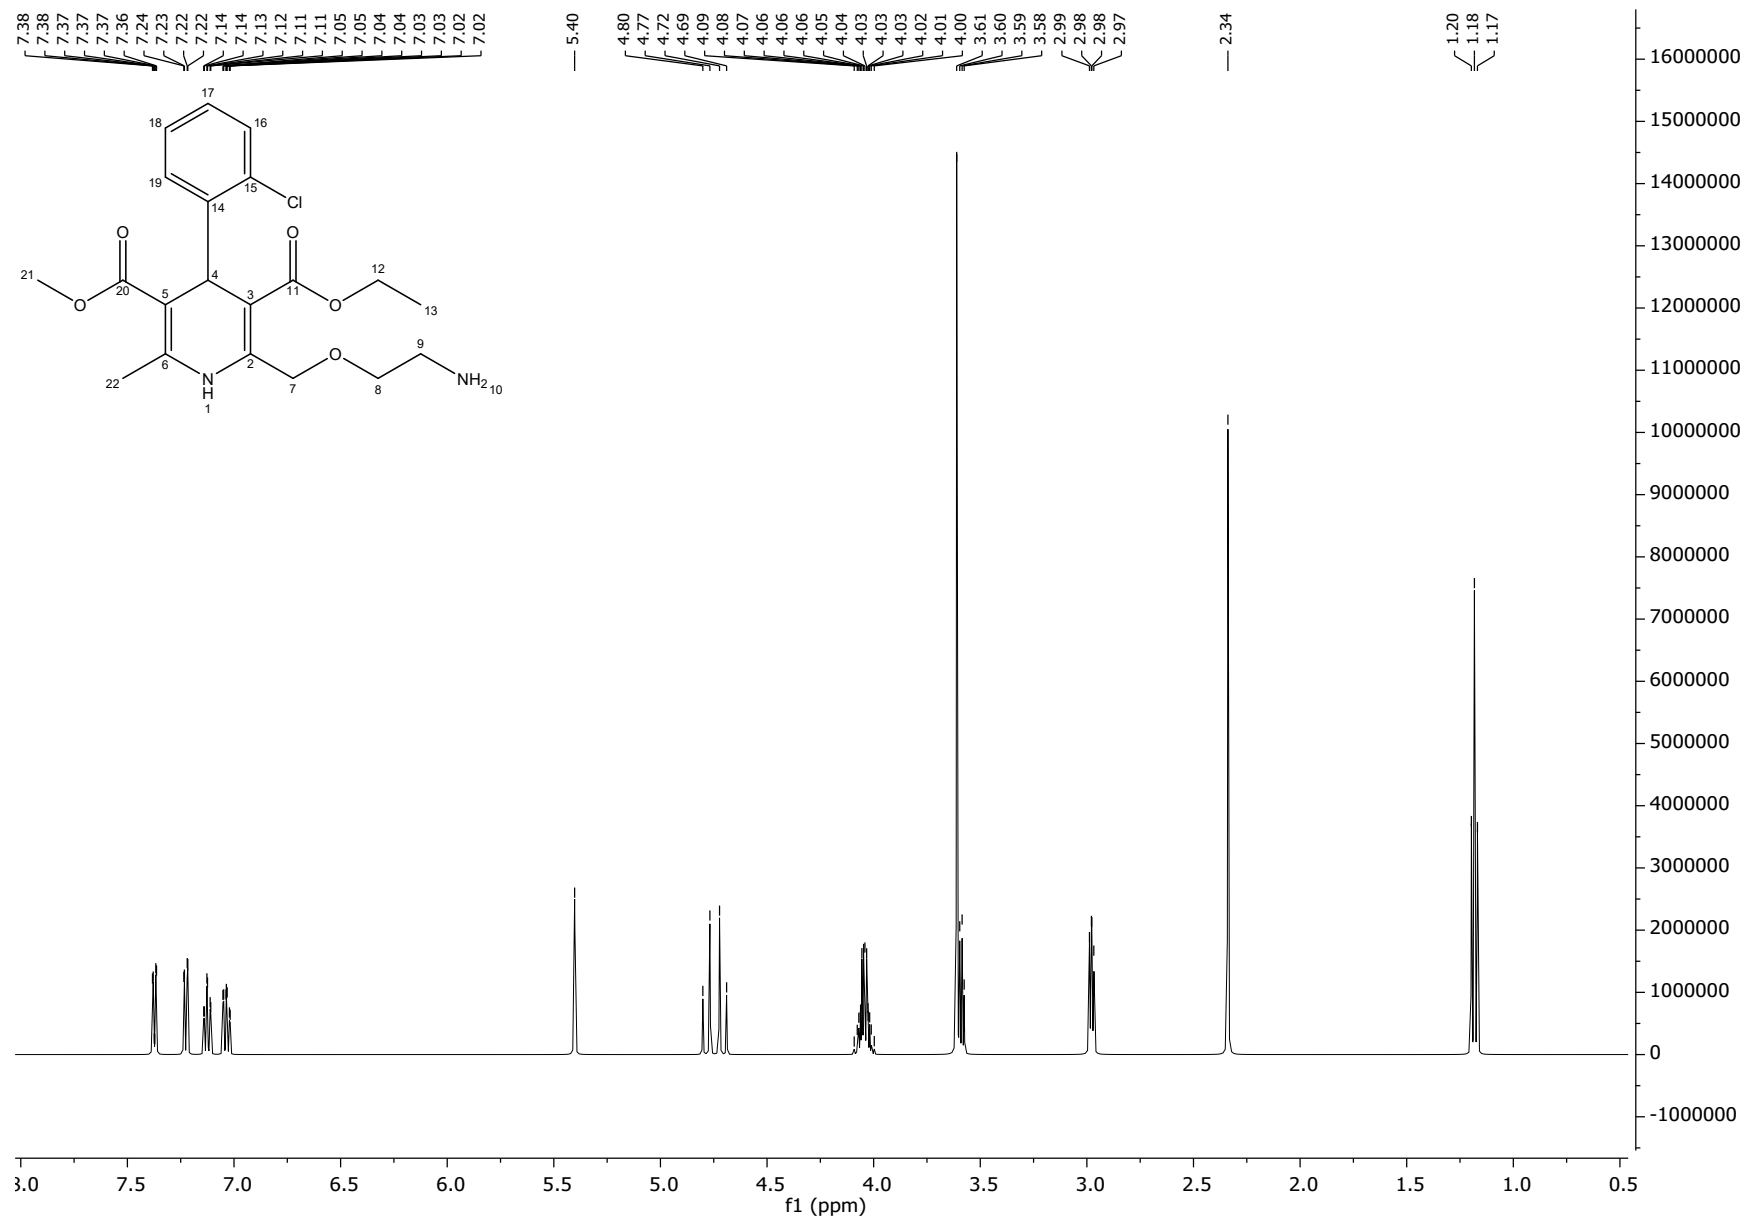

# Amlodipine

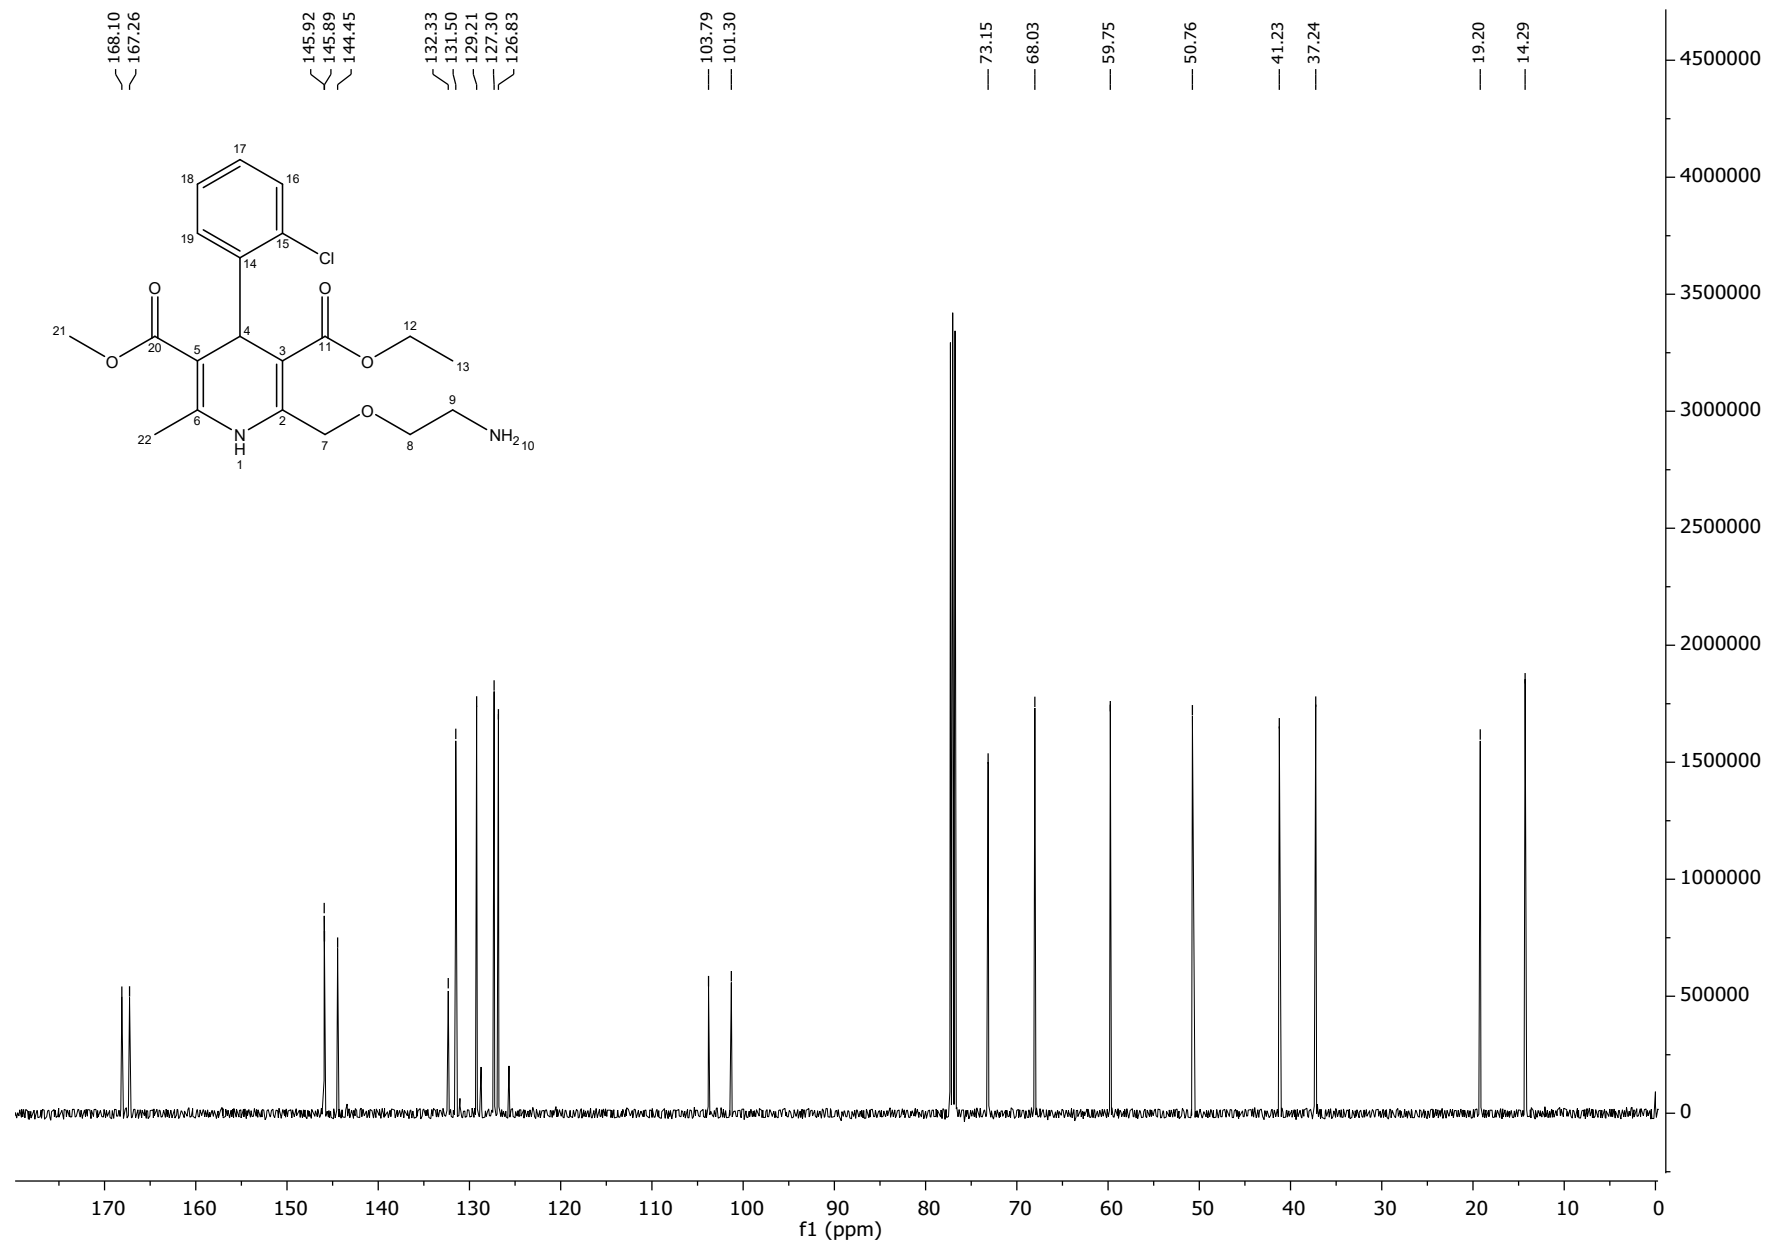

# Compound 4a

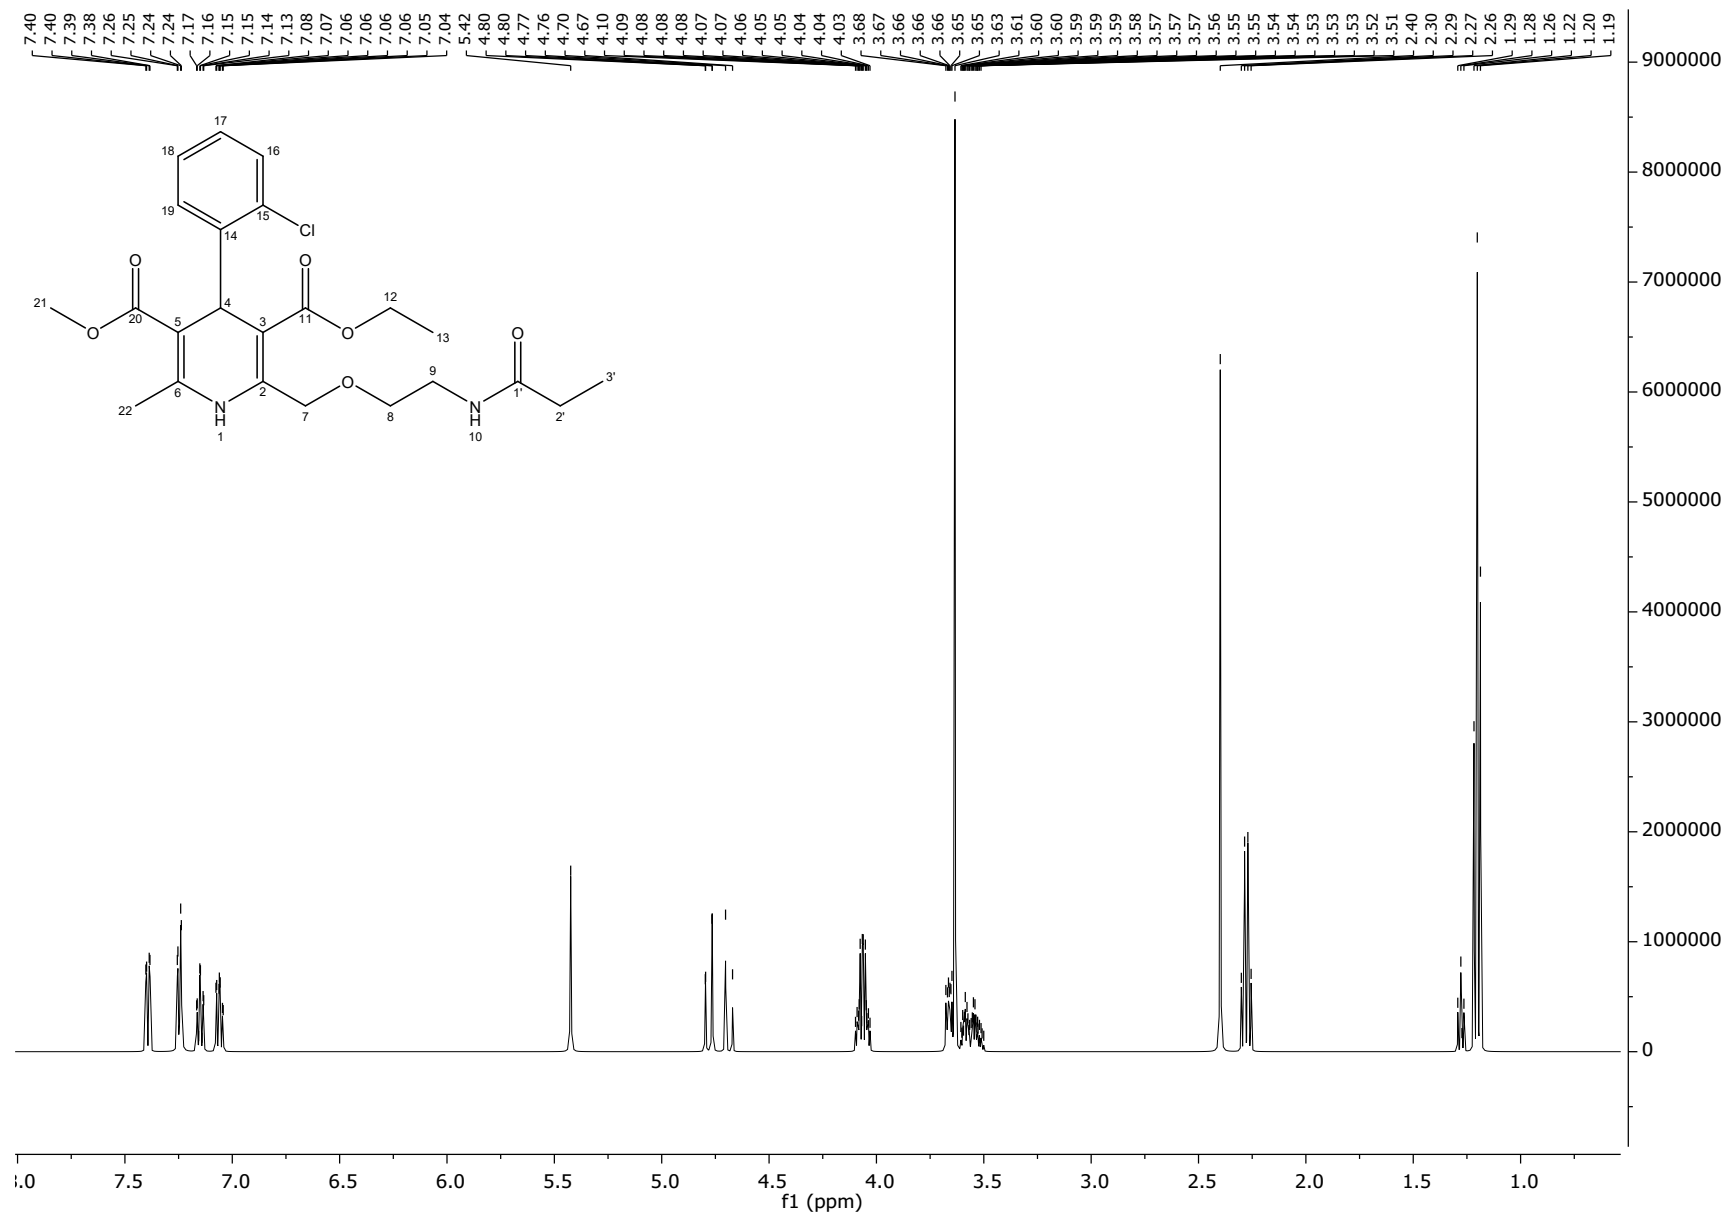

# Compound 4a

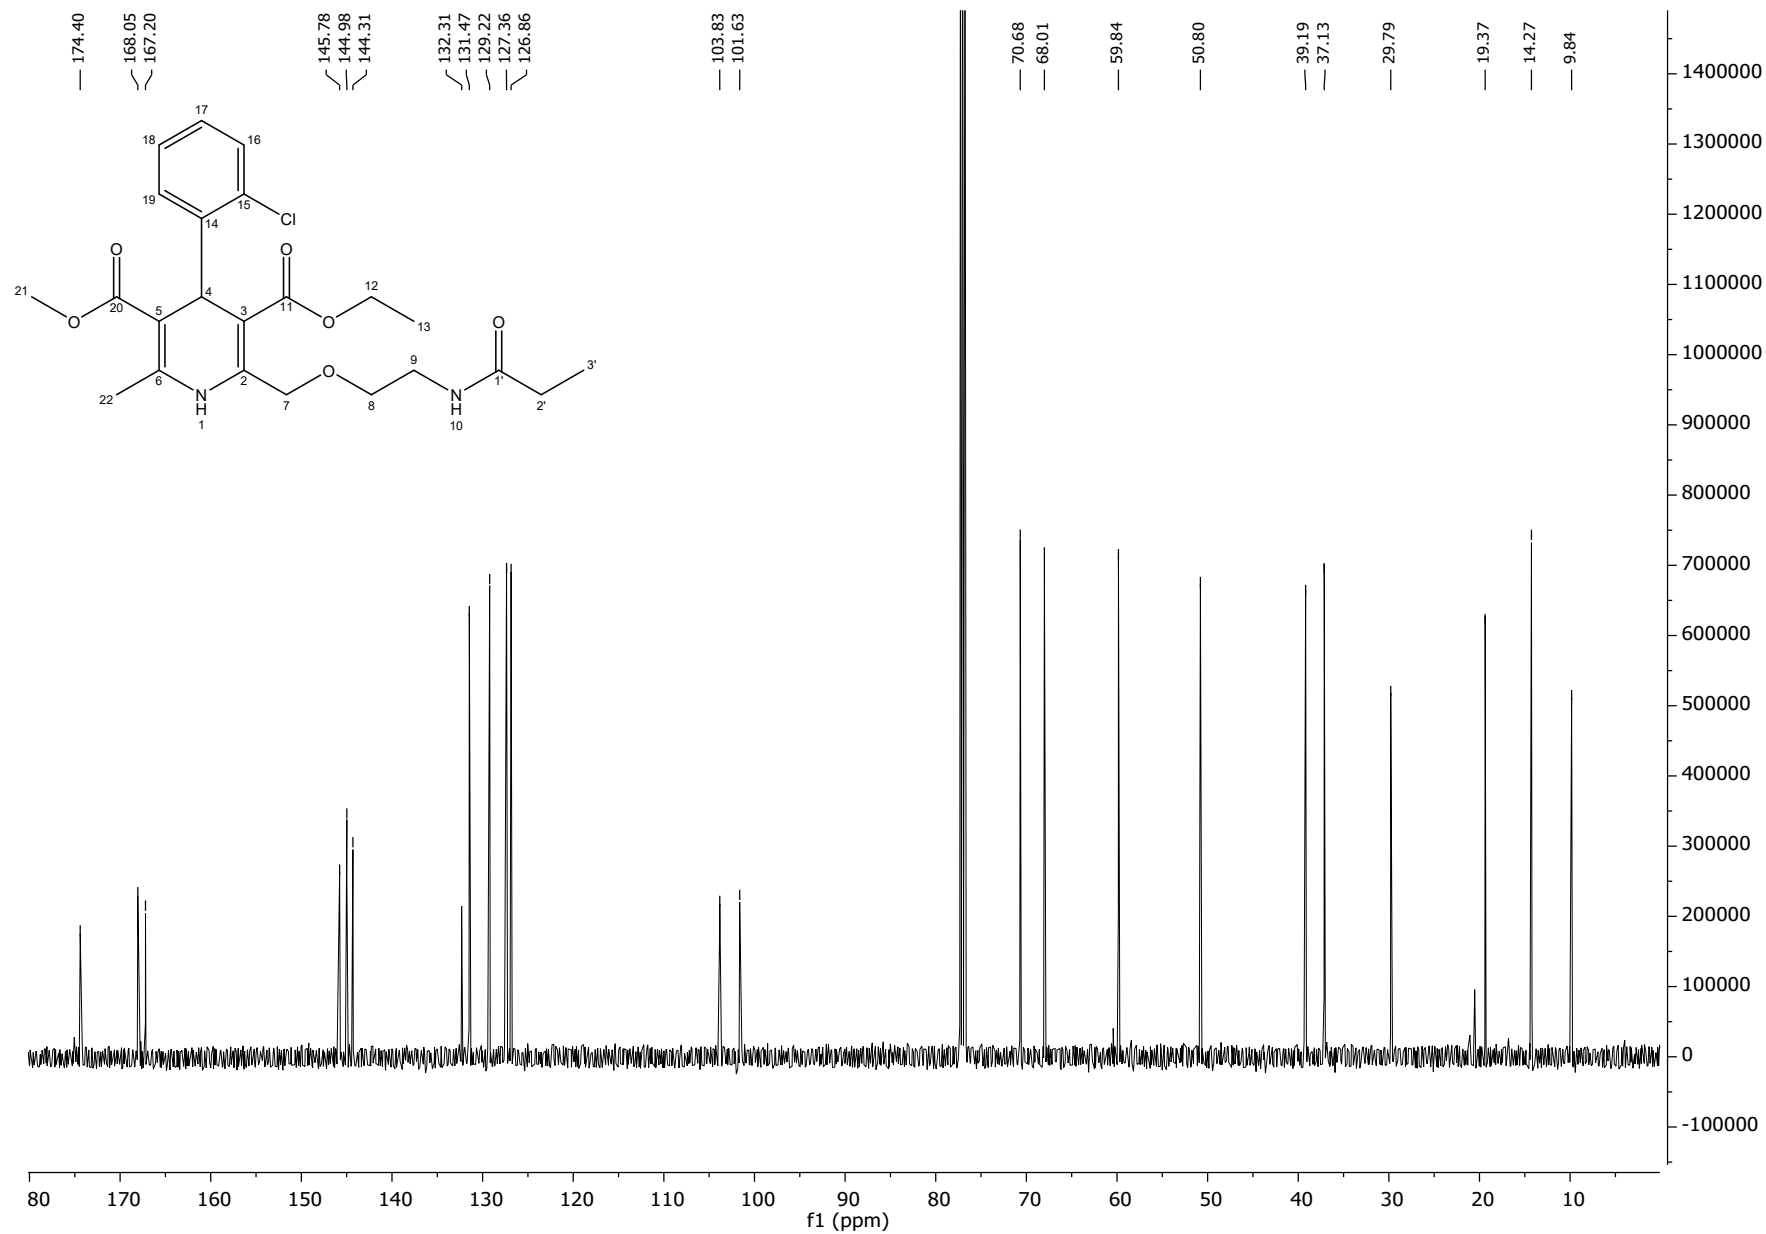

# Compound 4b

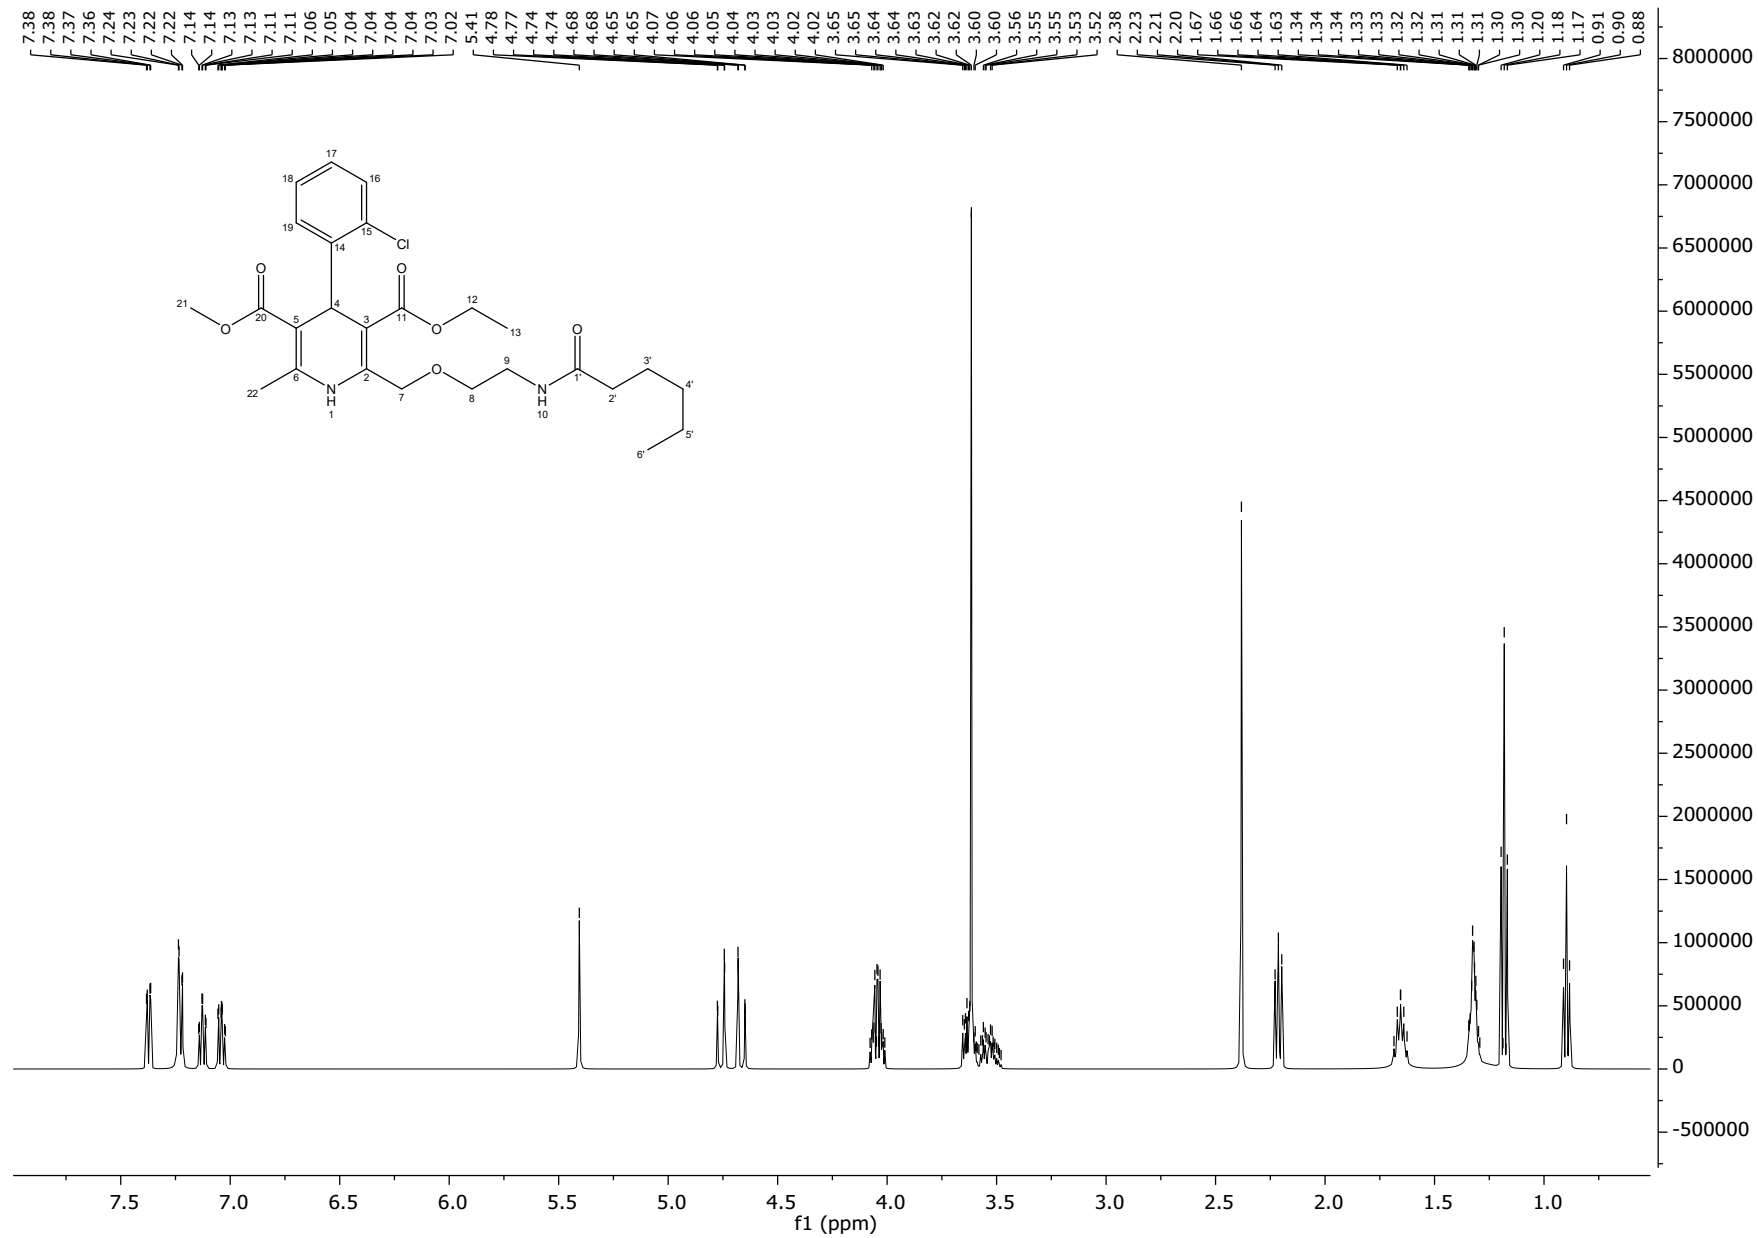

# Compuesto 4b

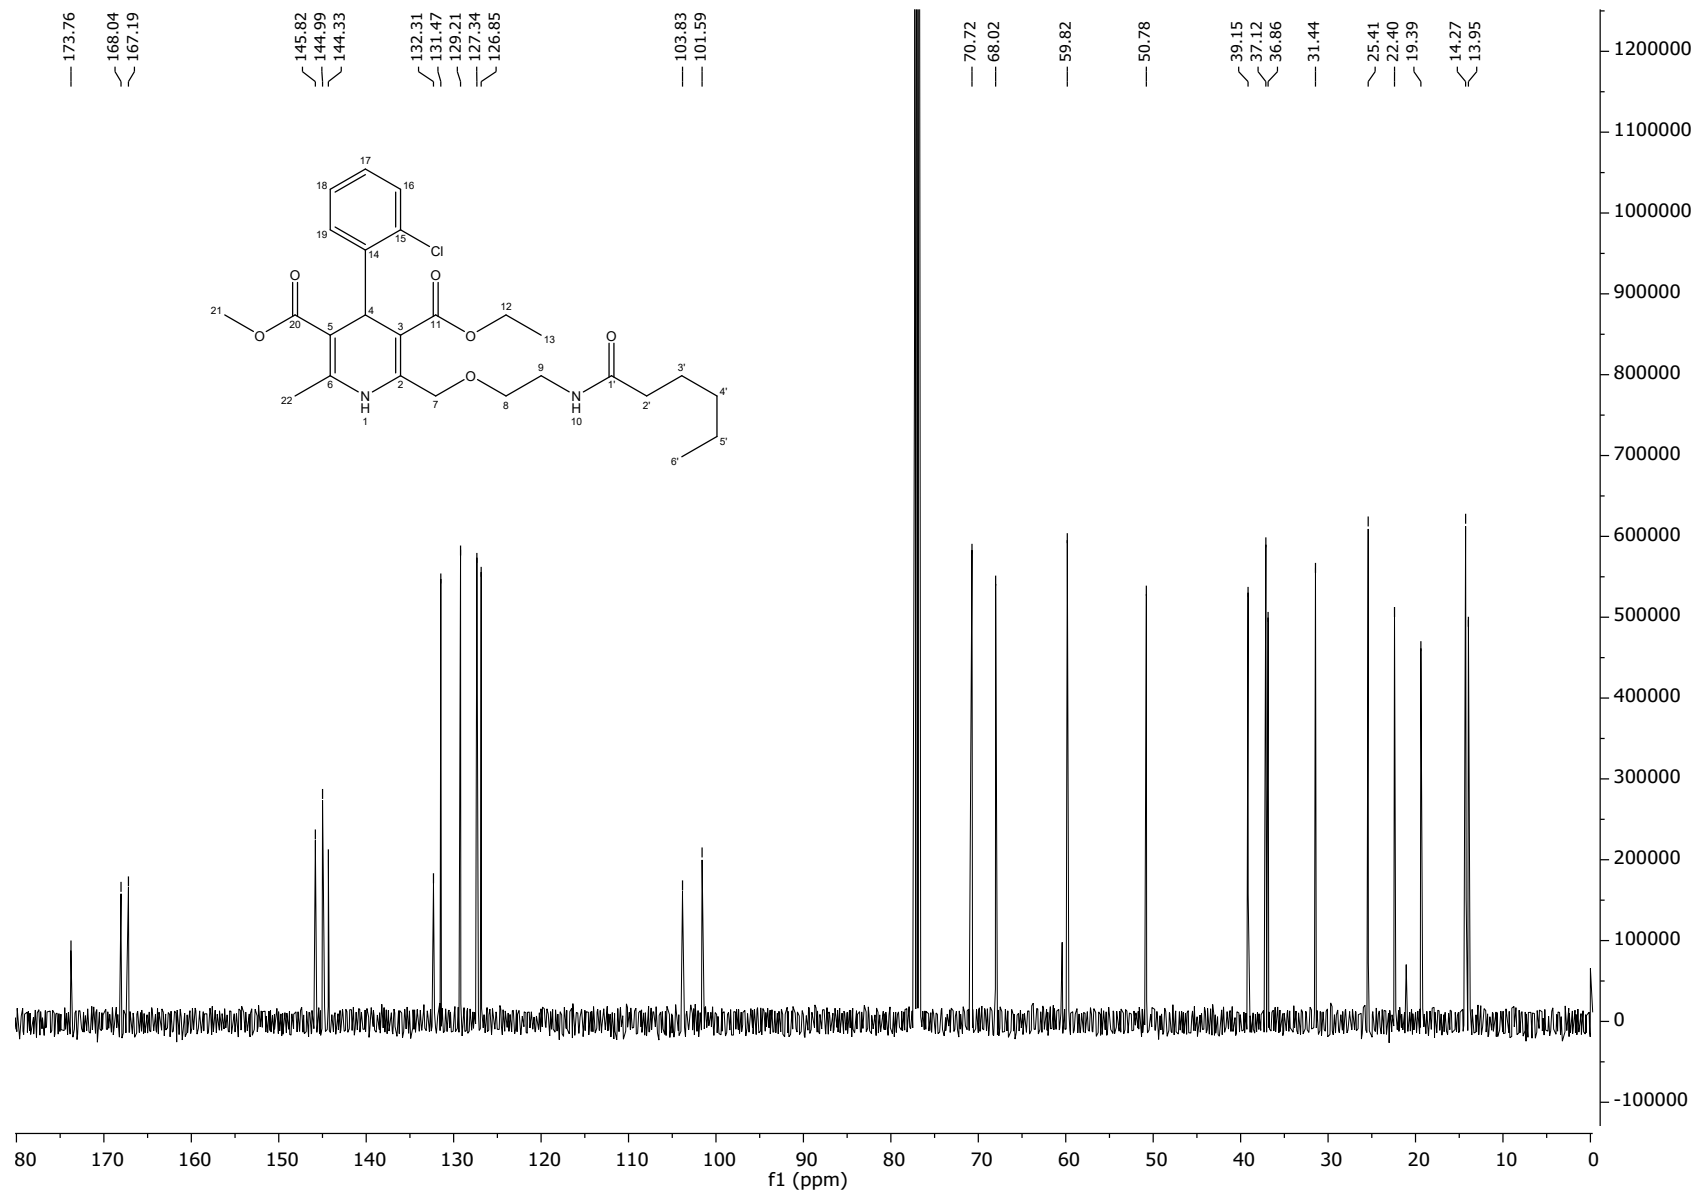

# Compound 4c

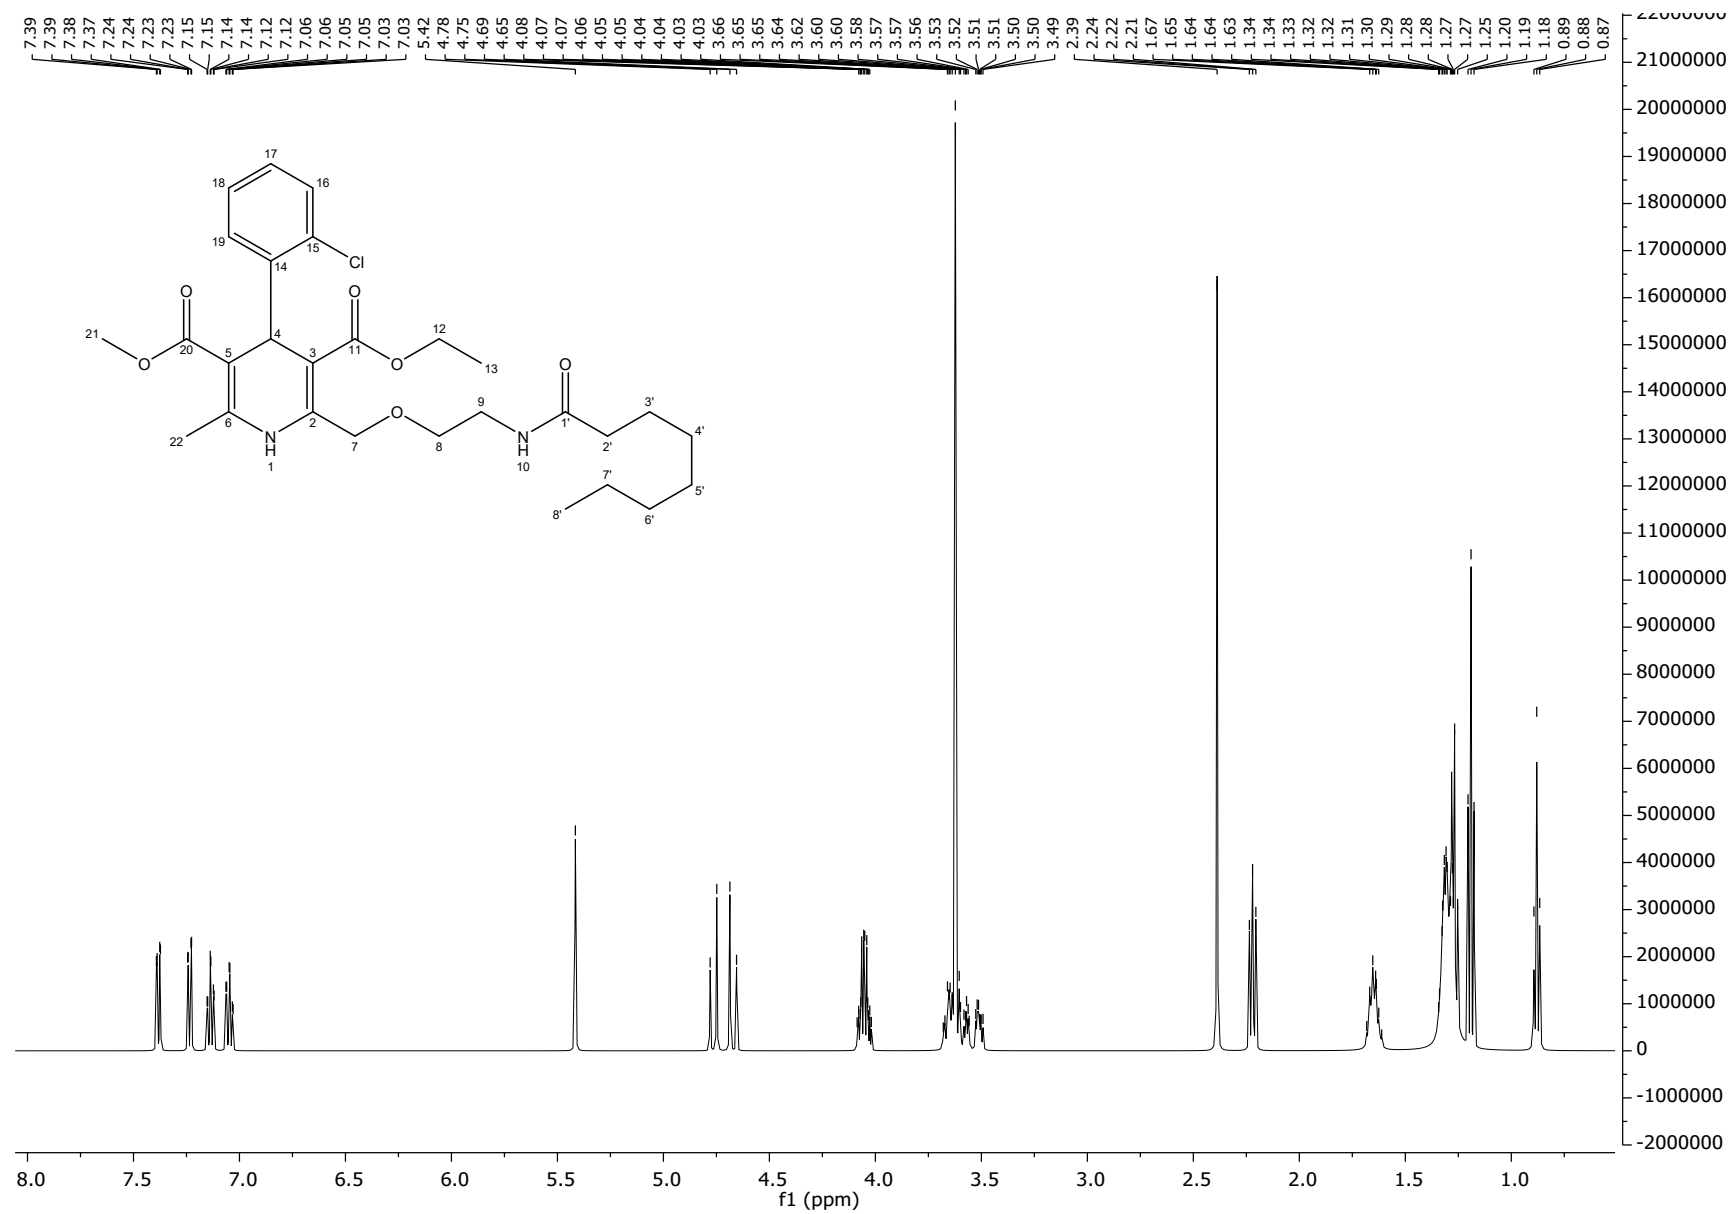



# Compuesto 4c

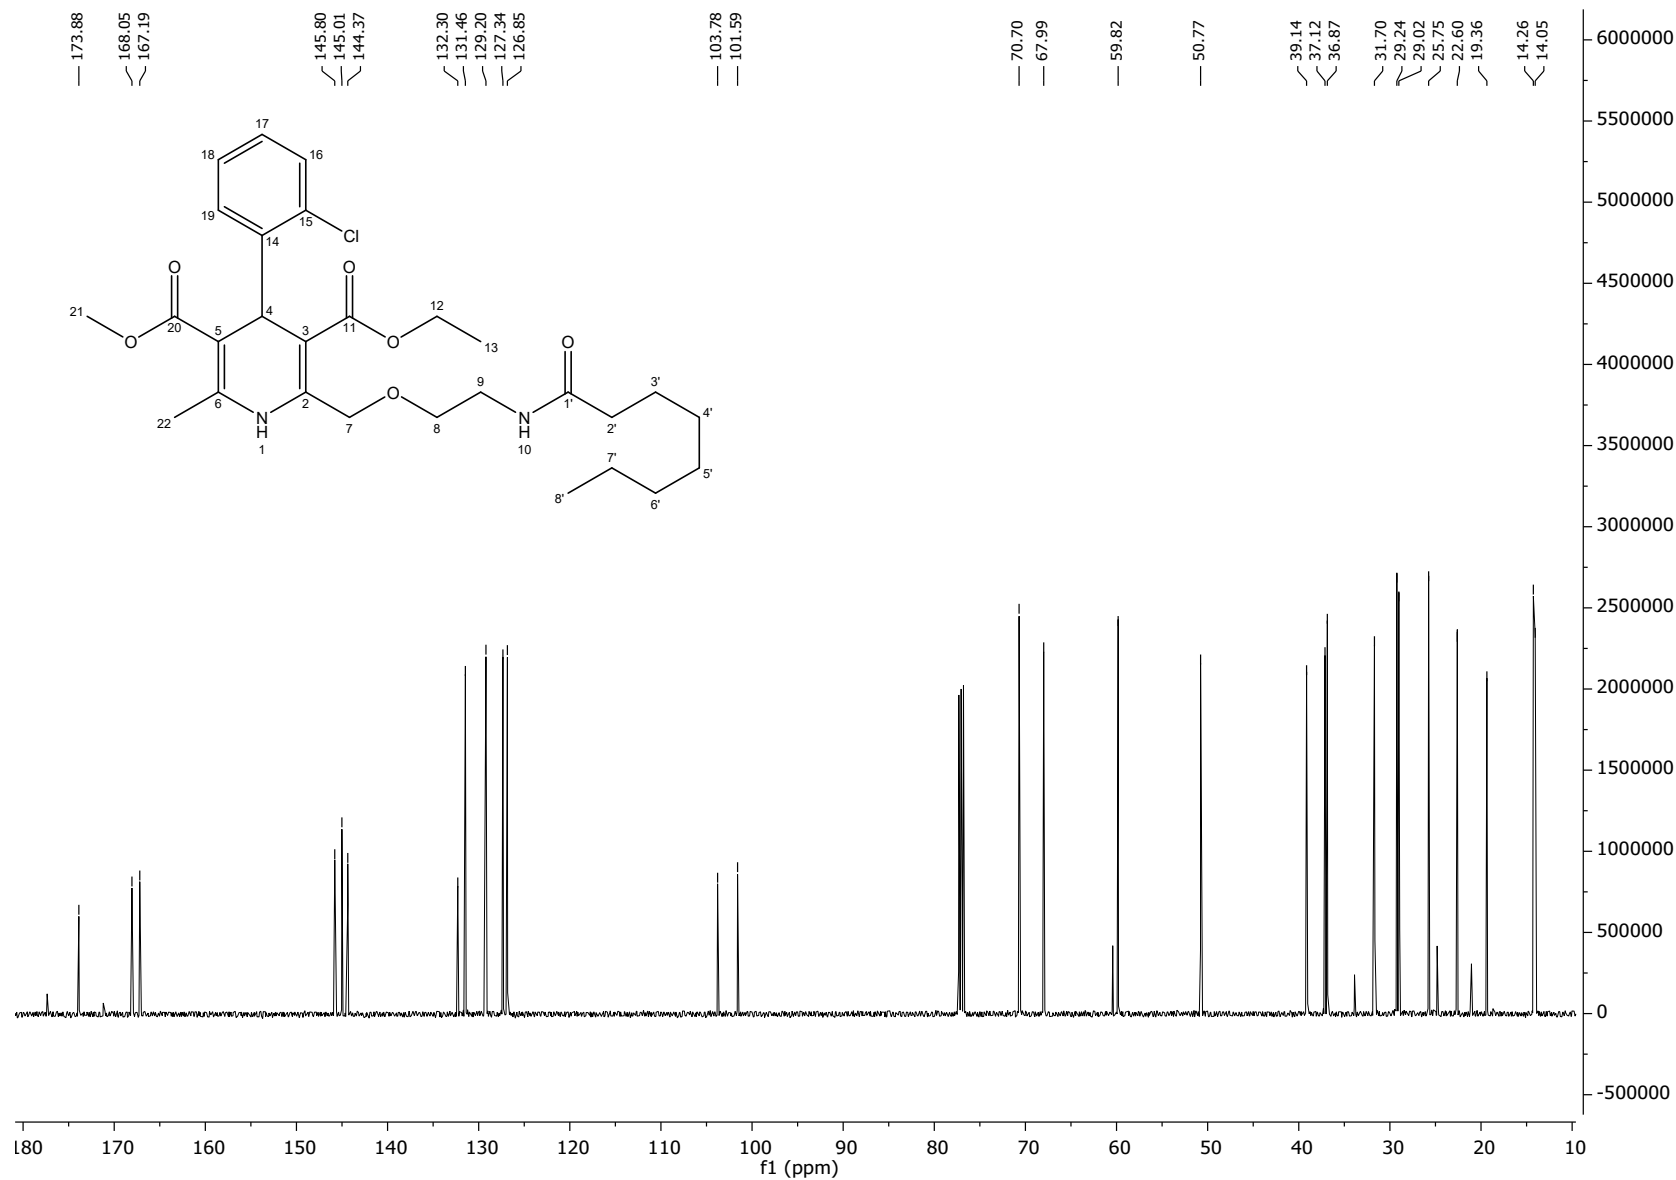

# Compound 4d

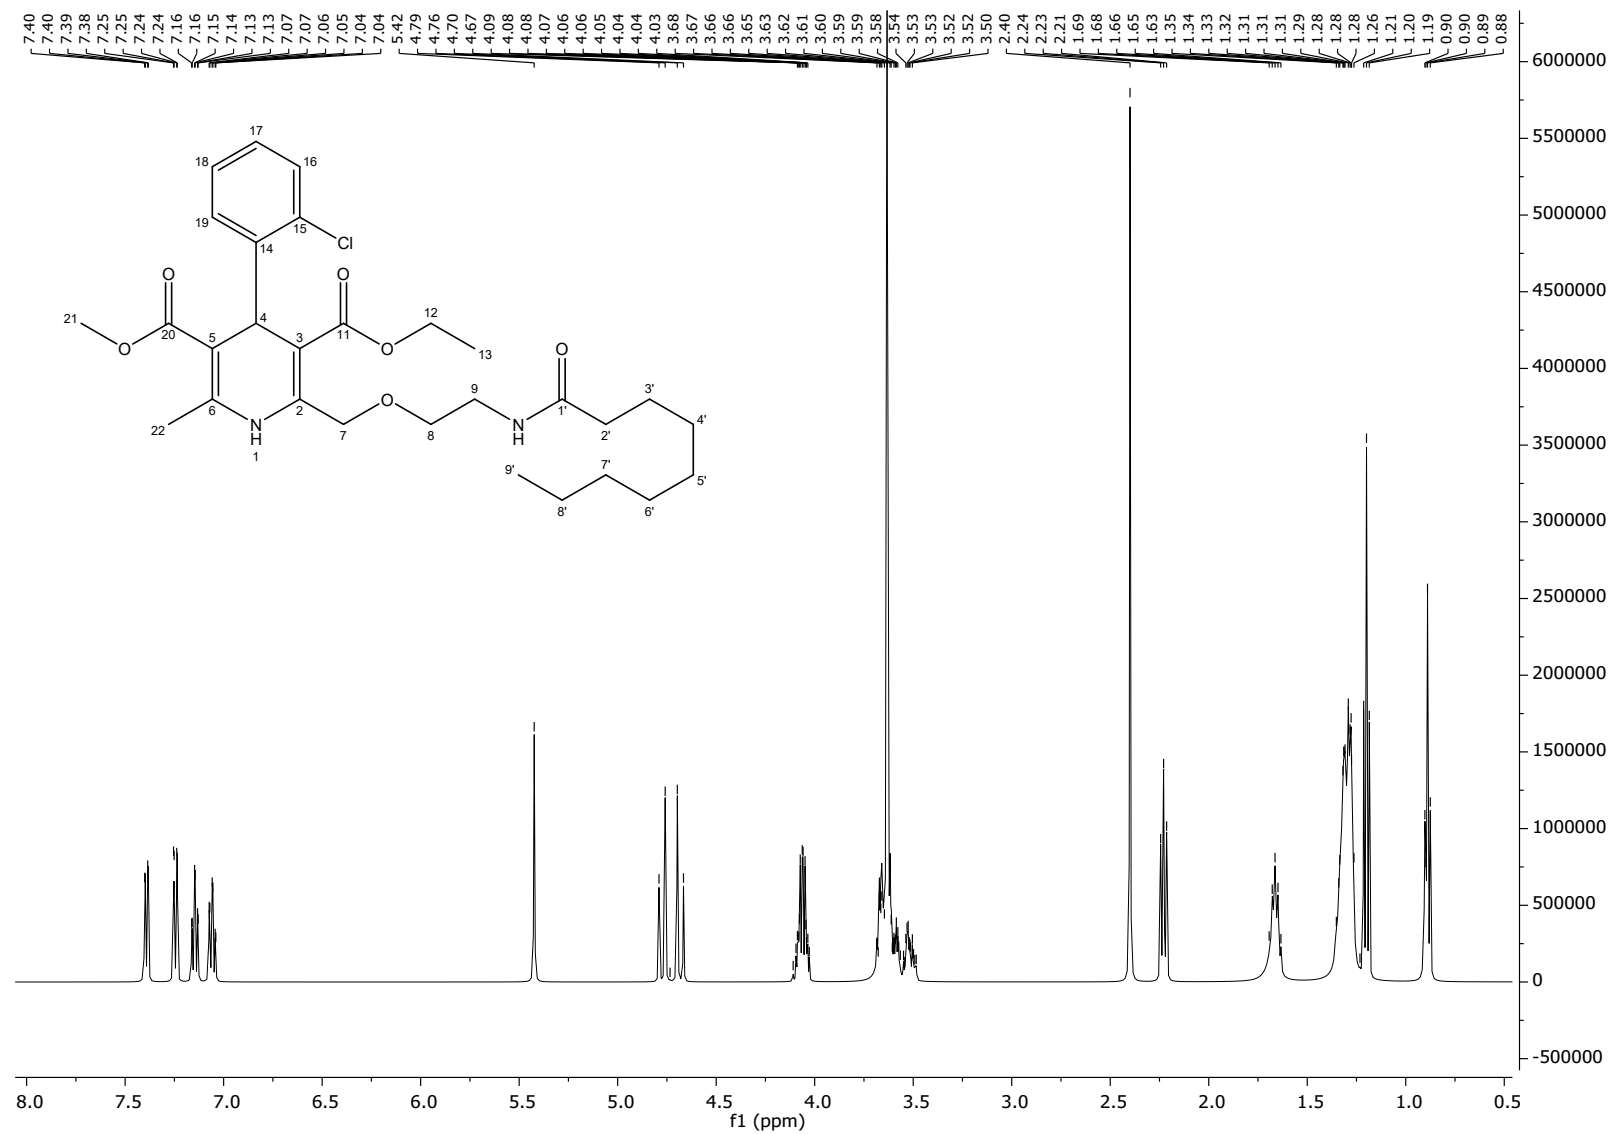

Compuesto 4d

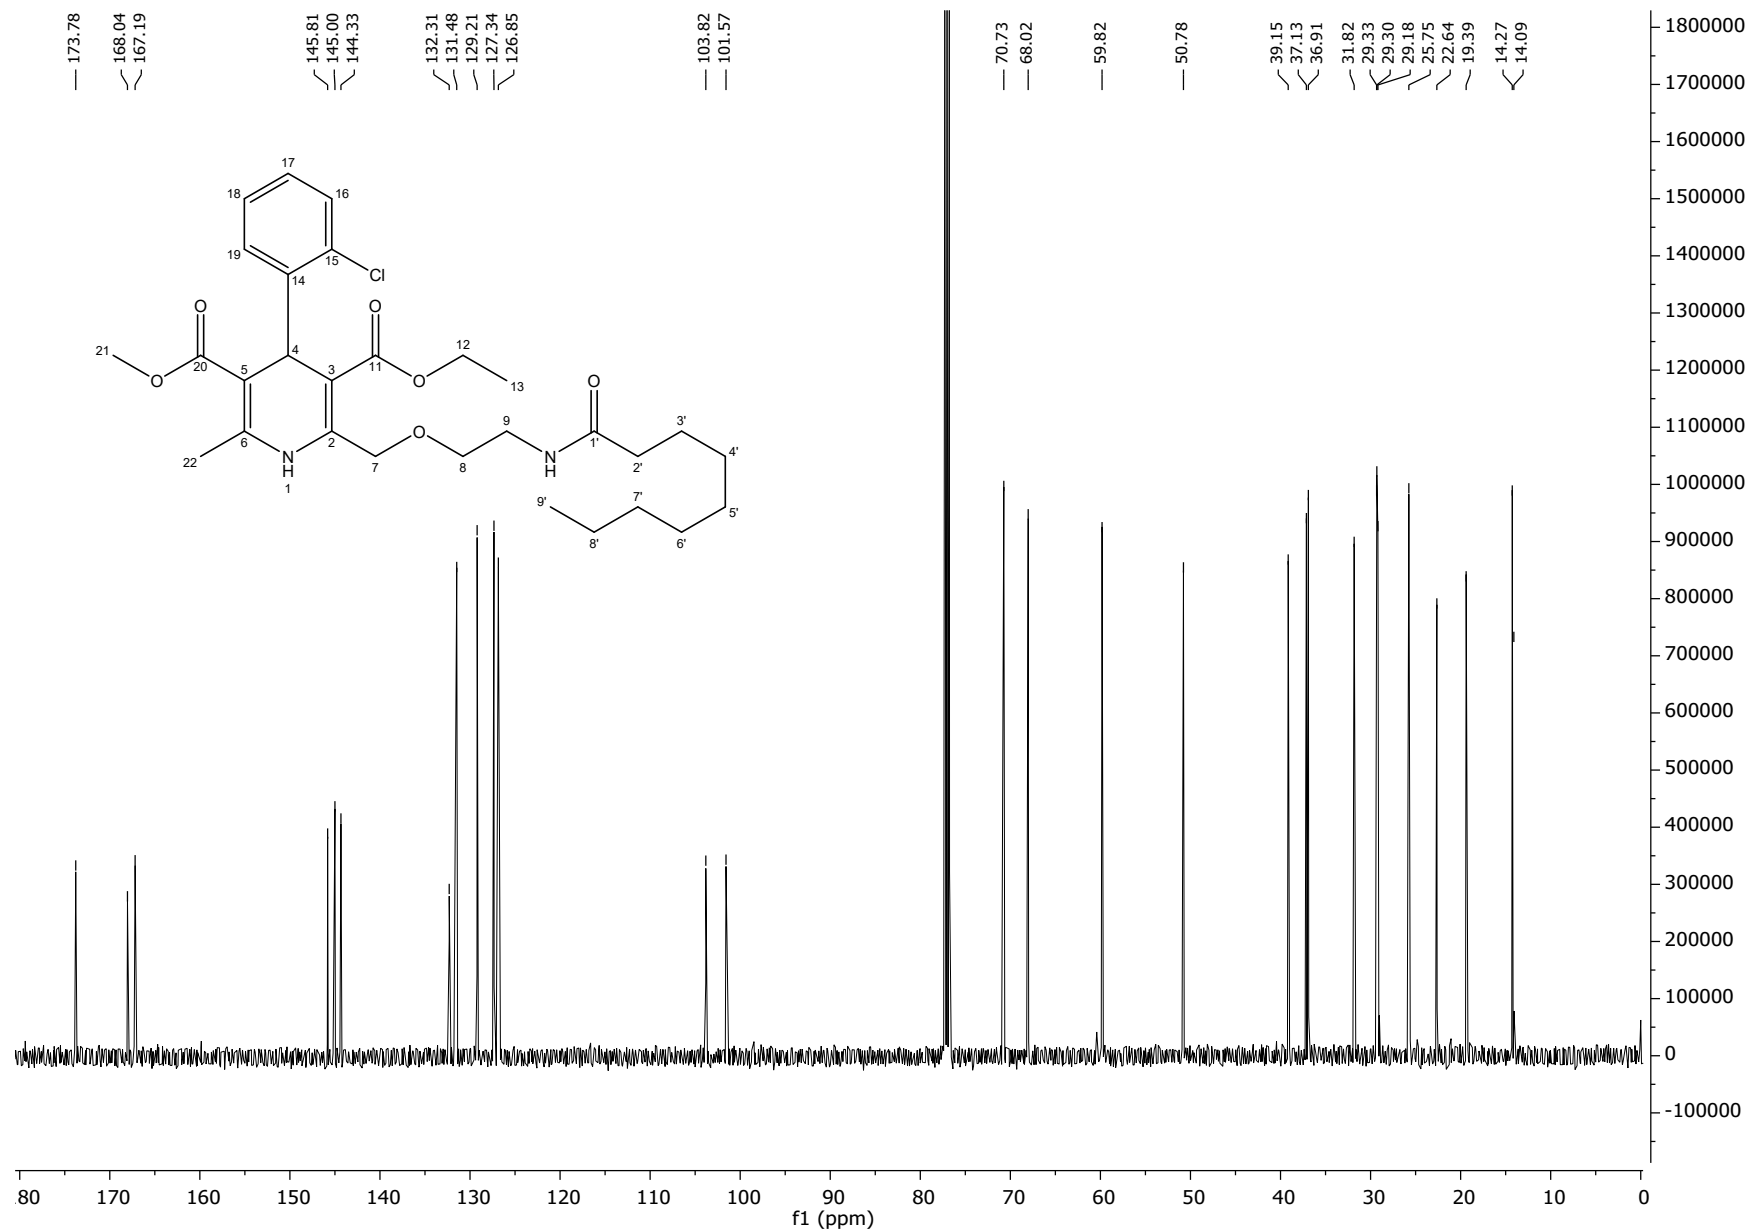

# Compound 4e

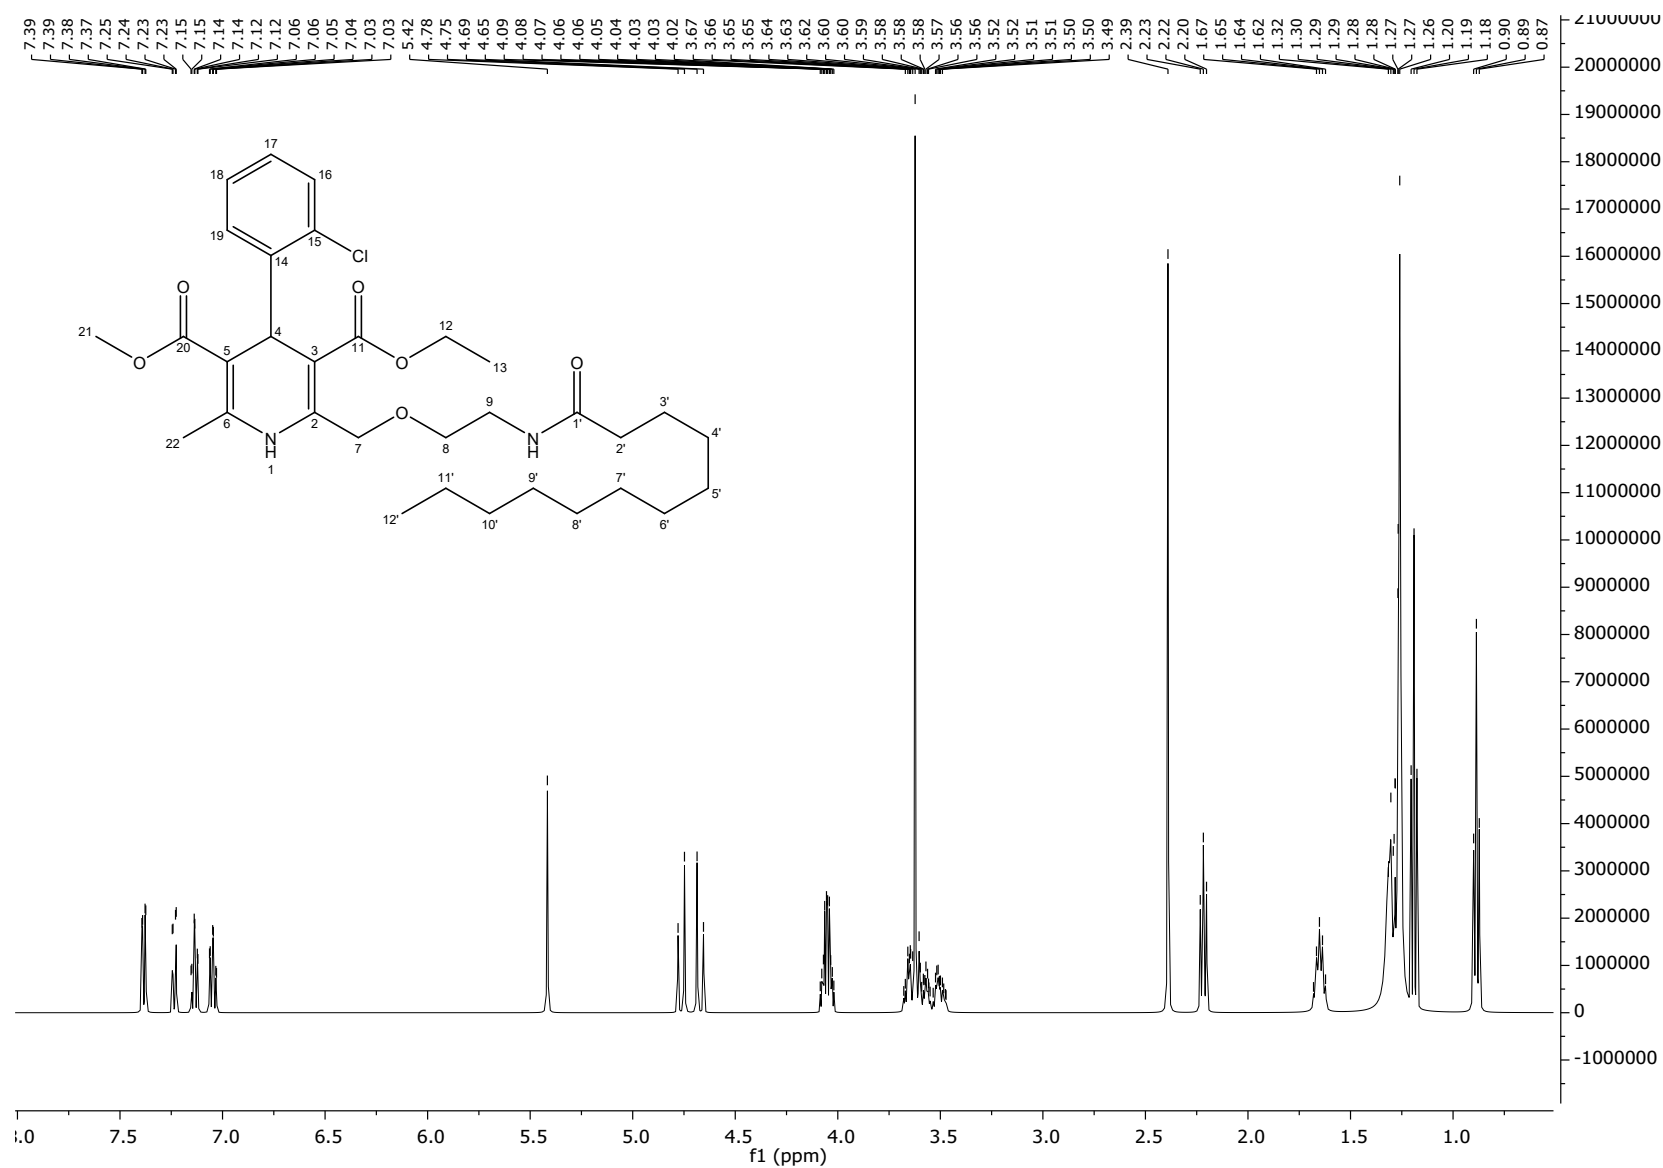

Compuesto 4e

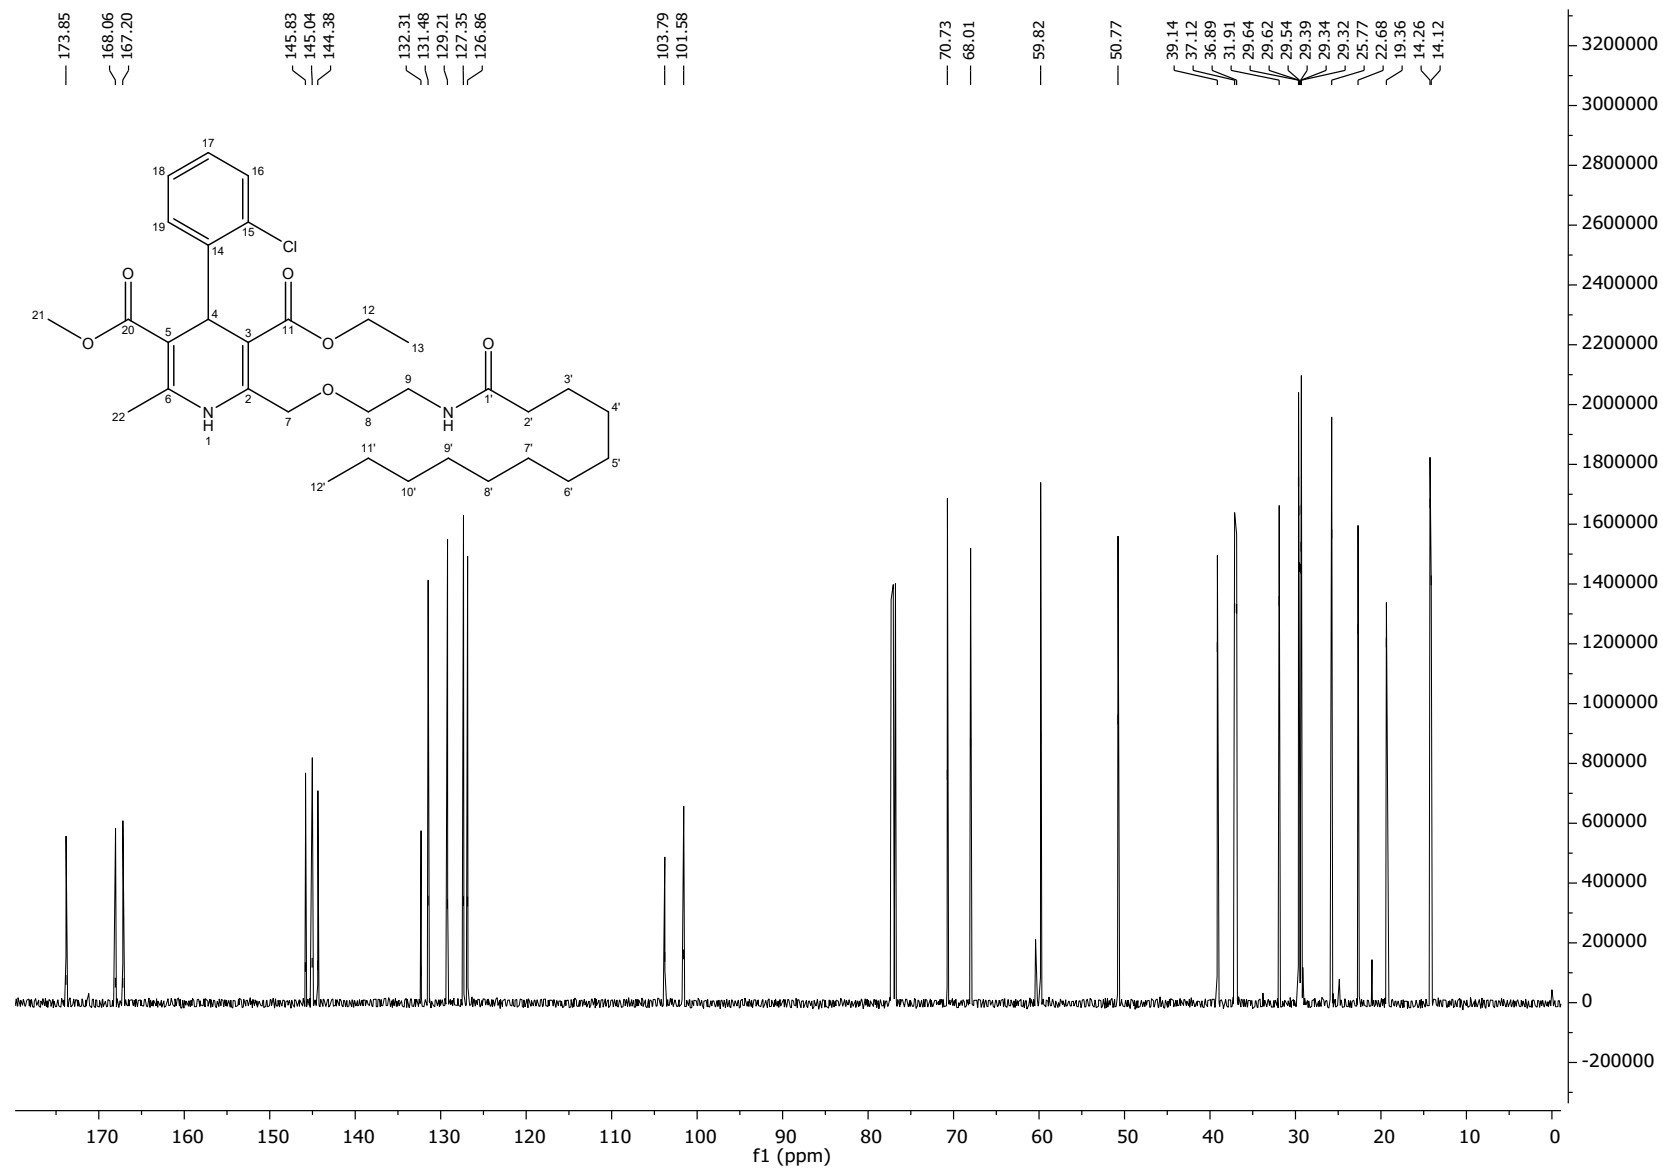

# Compound 4f

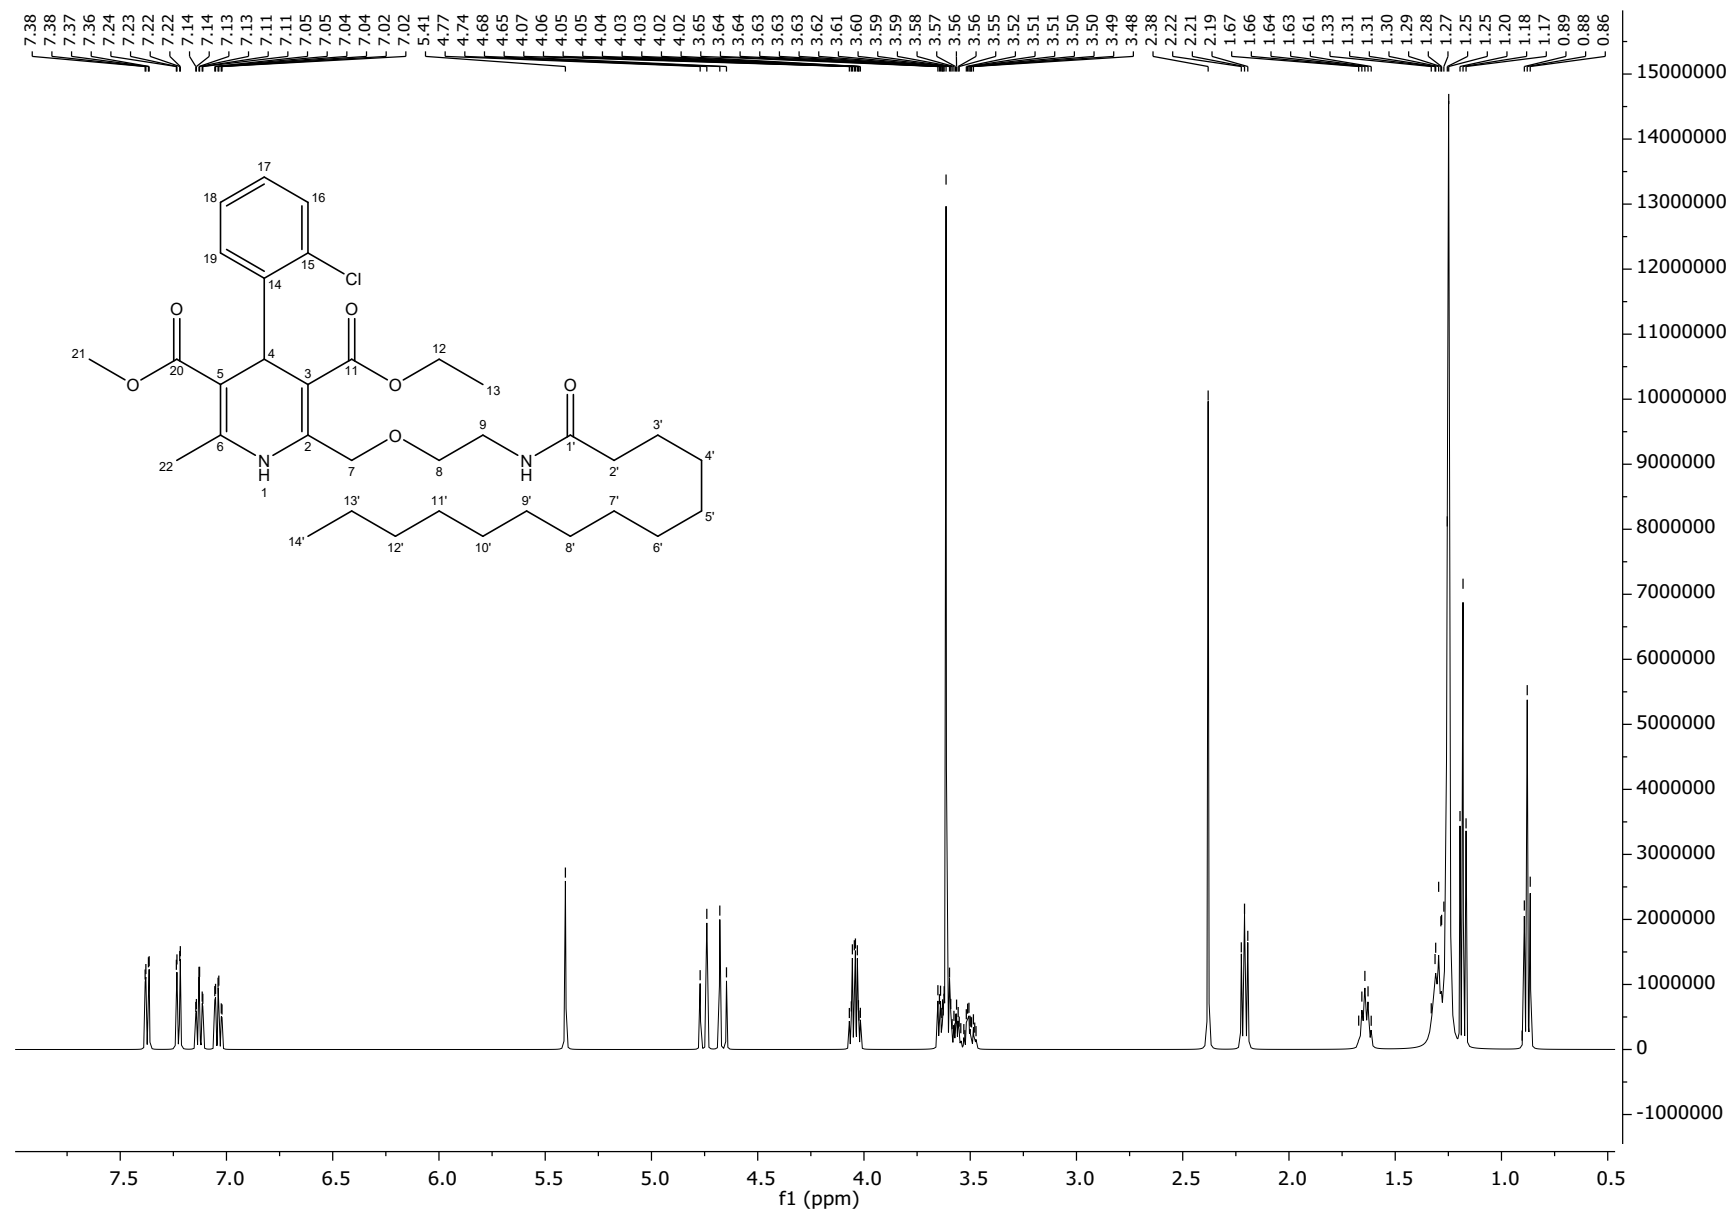

Compuesto 4f

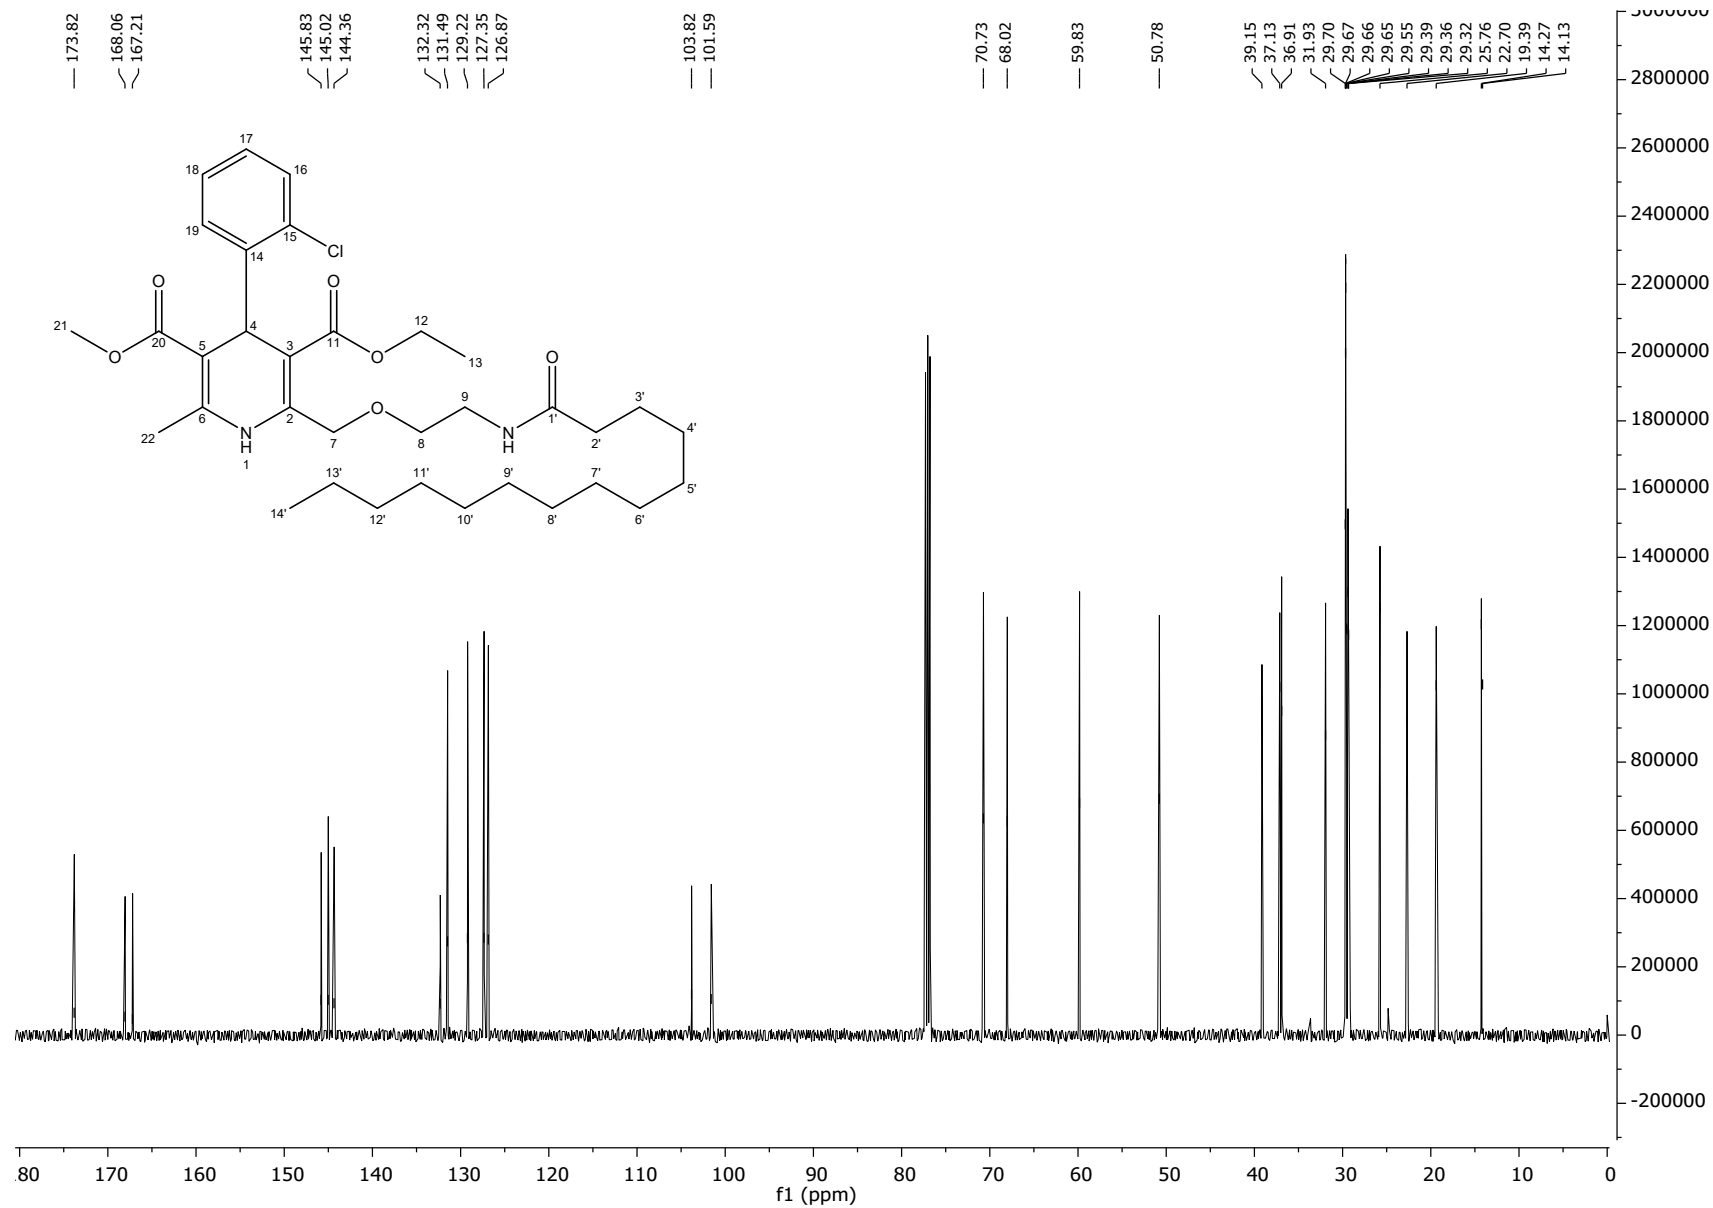

# Compound 4g

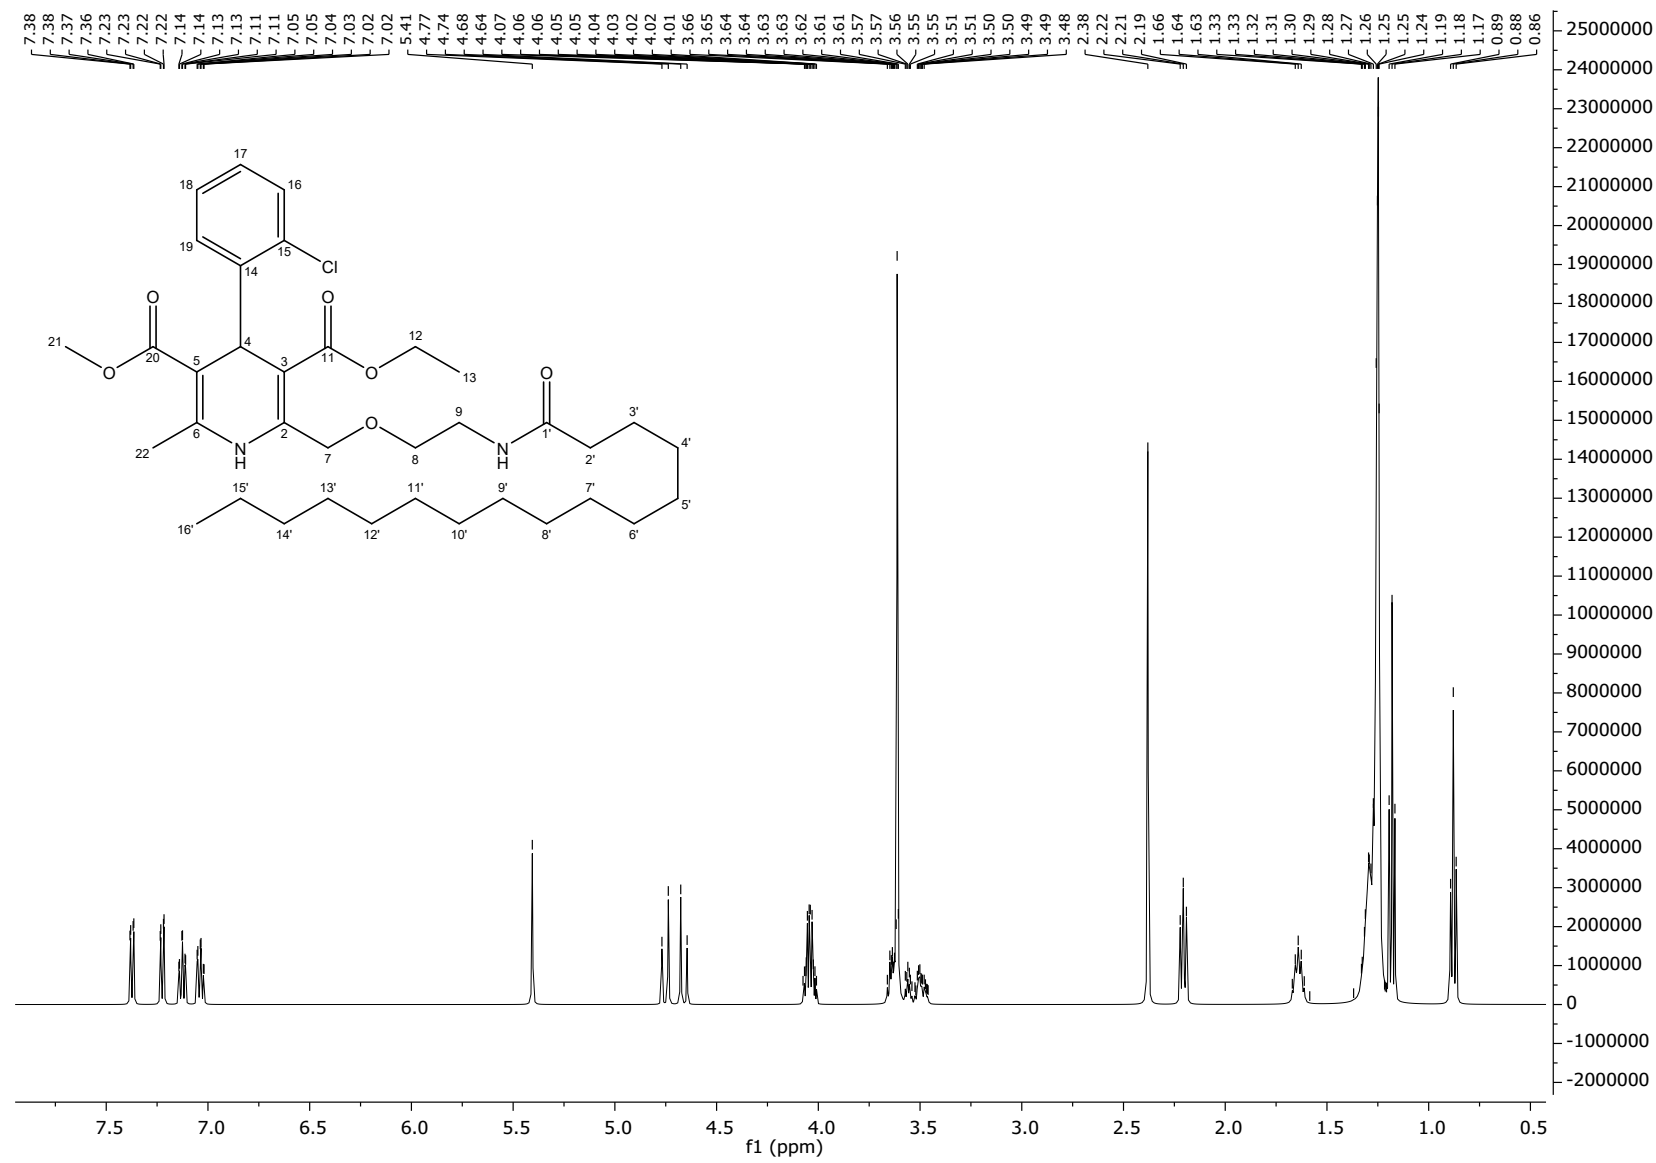



# Compuesto 4g

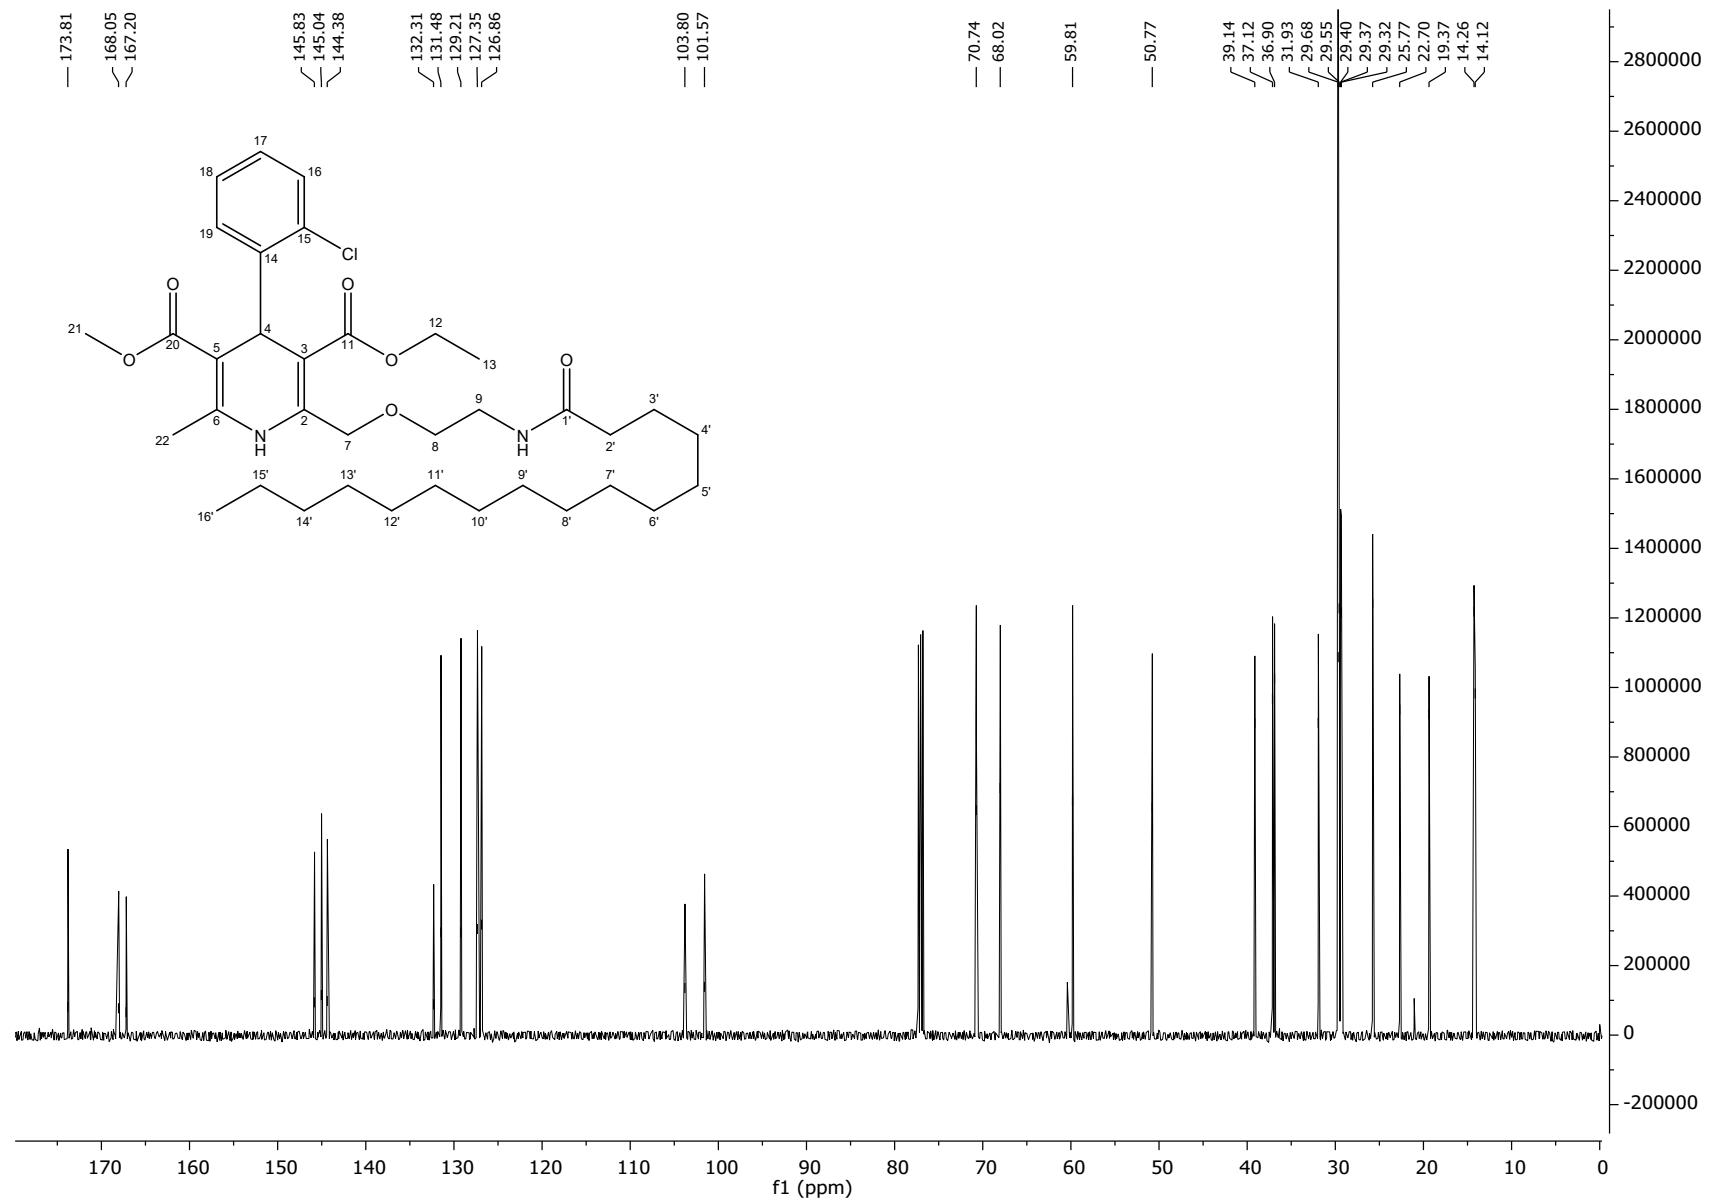

# Compound 4h

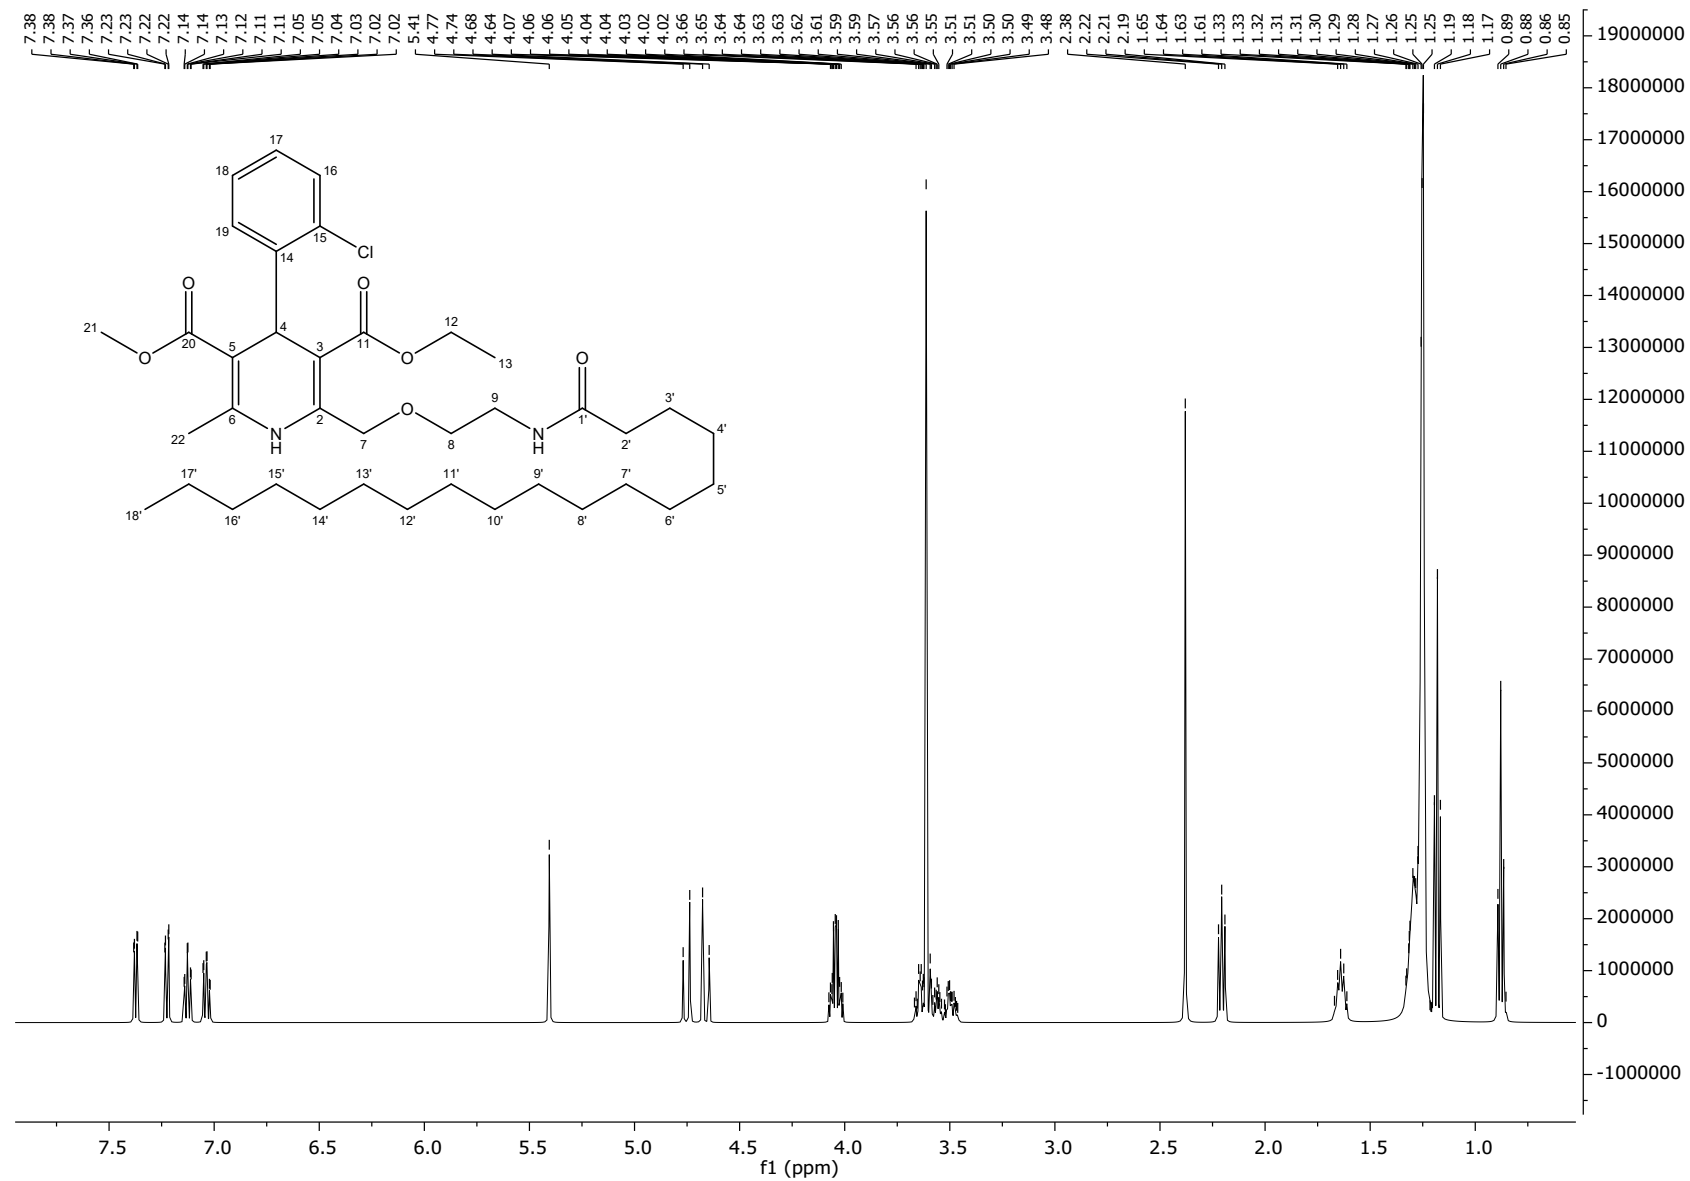

Compuesto 4h

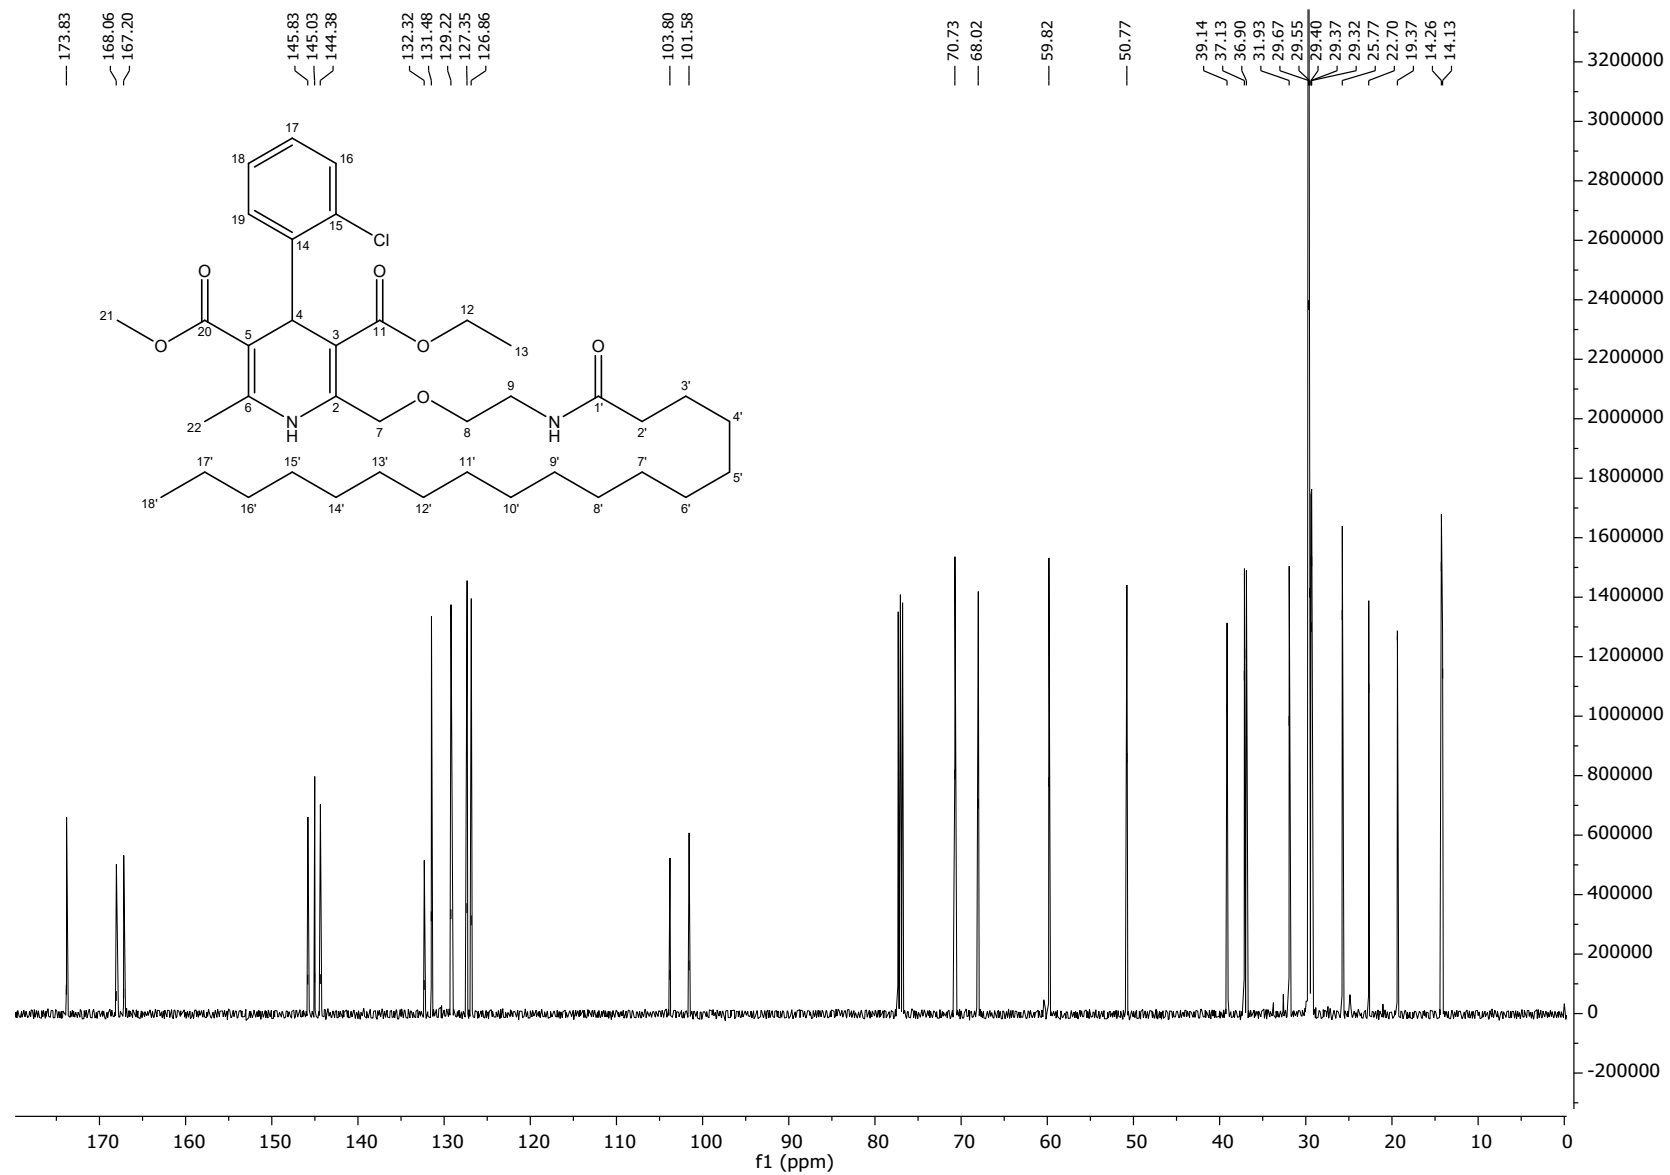

# Compound 4i

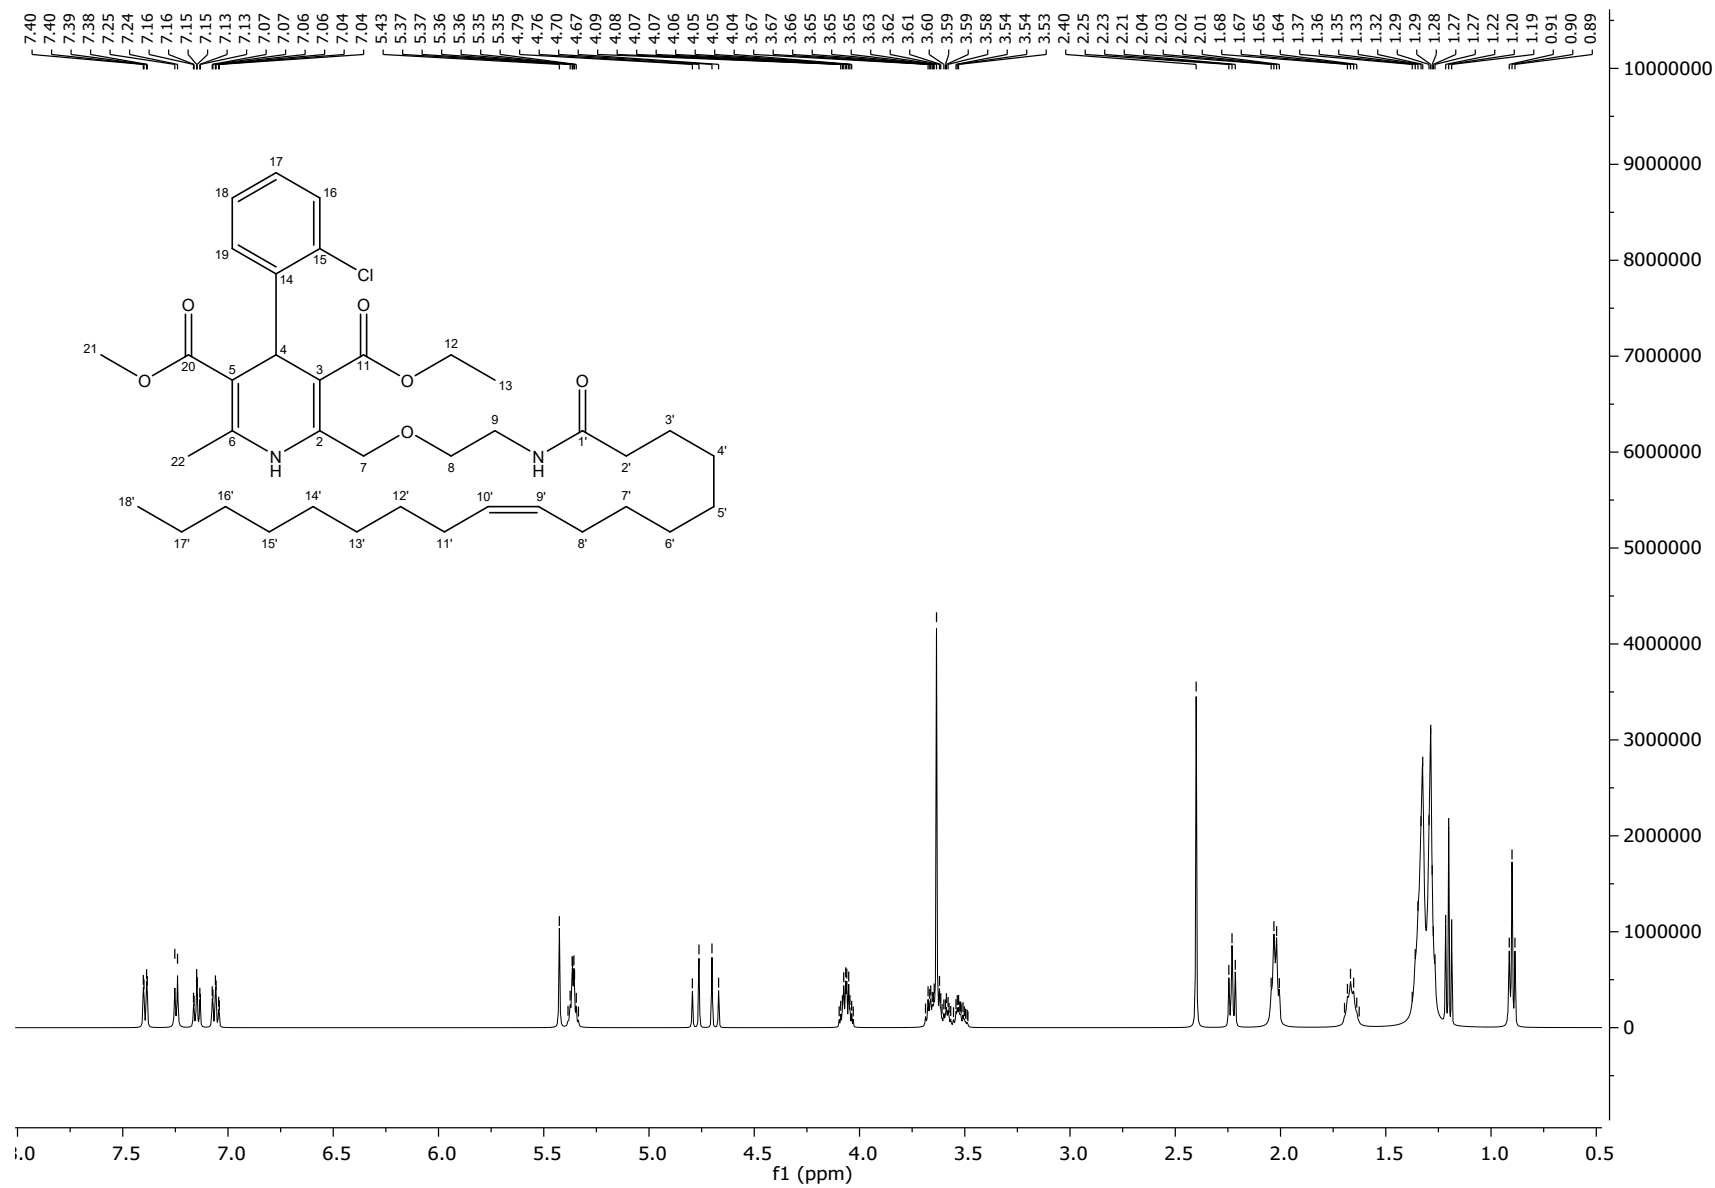

Compuesto 4i

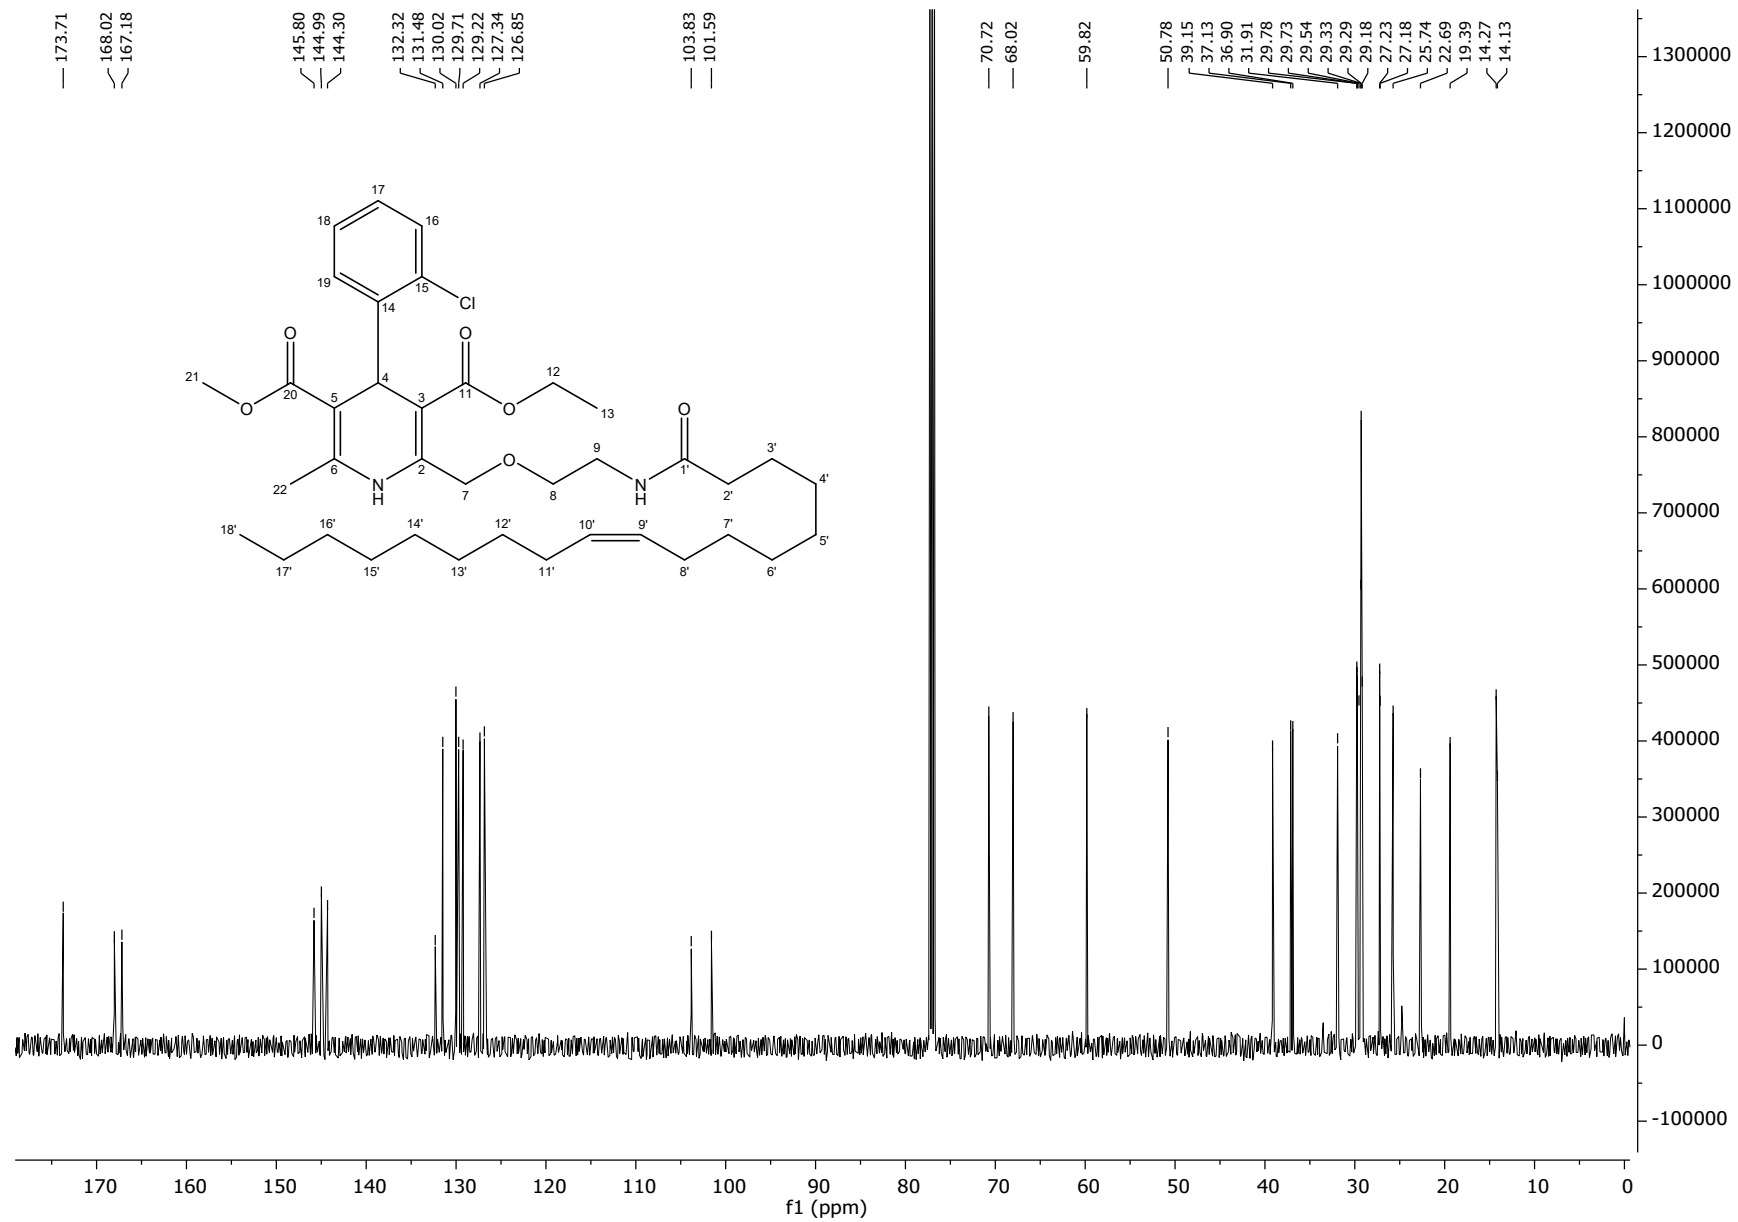

# Compound 4j

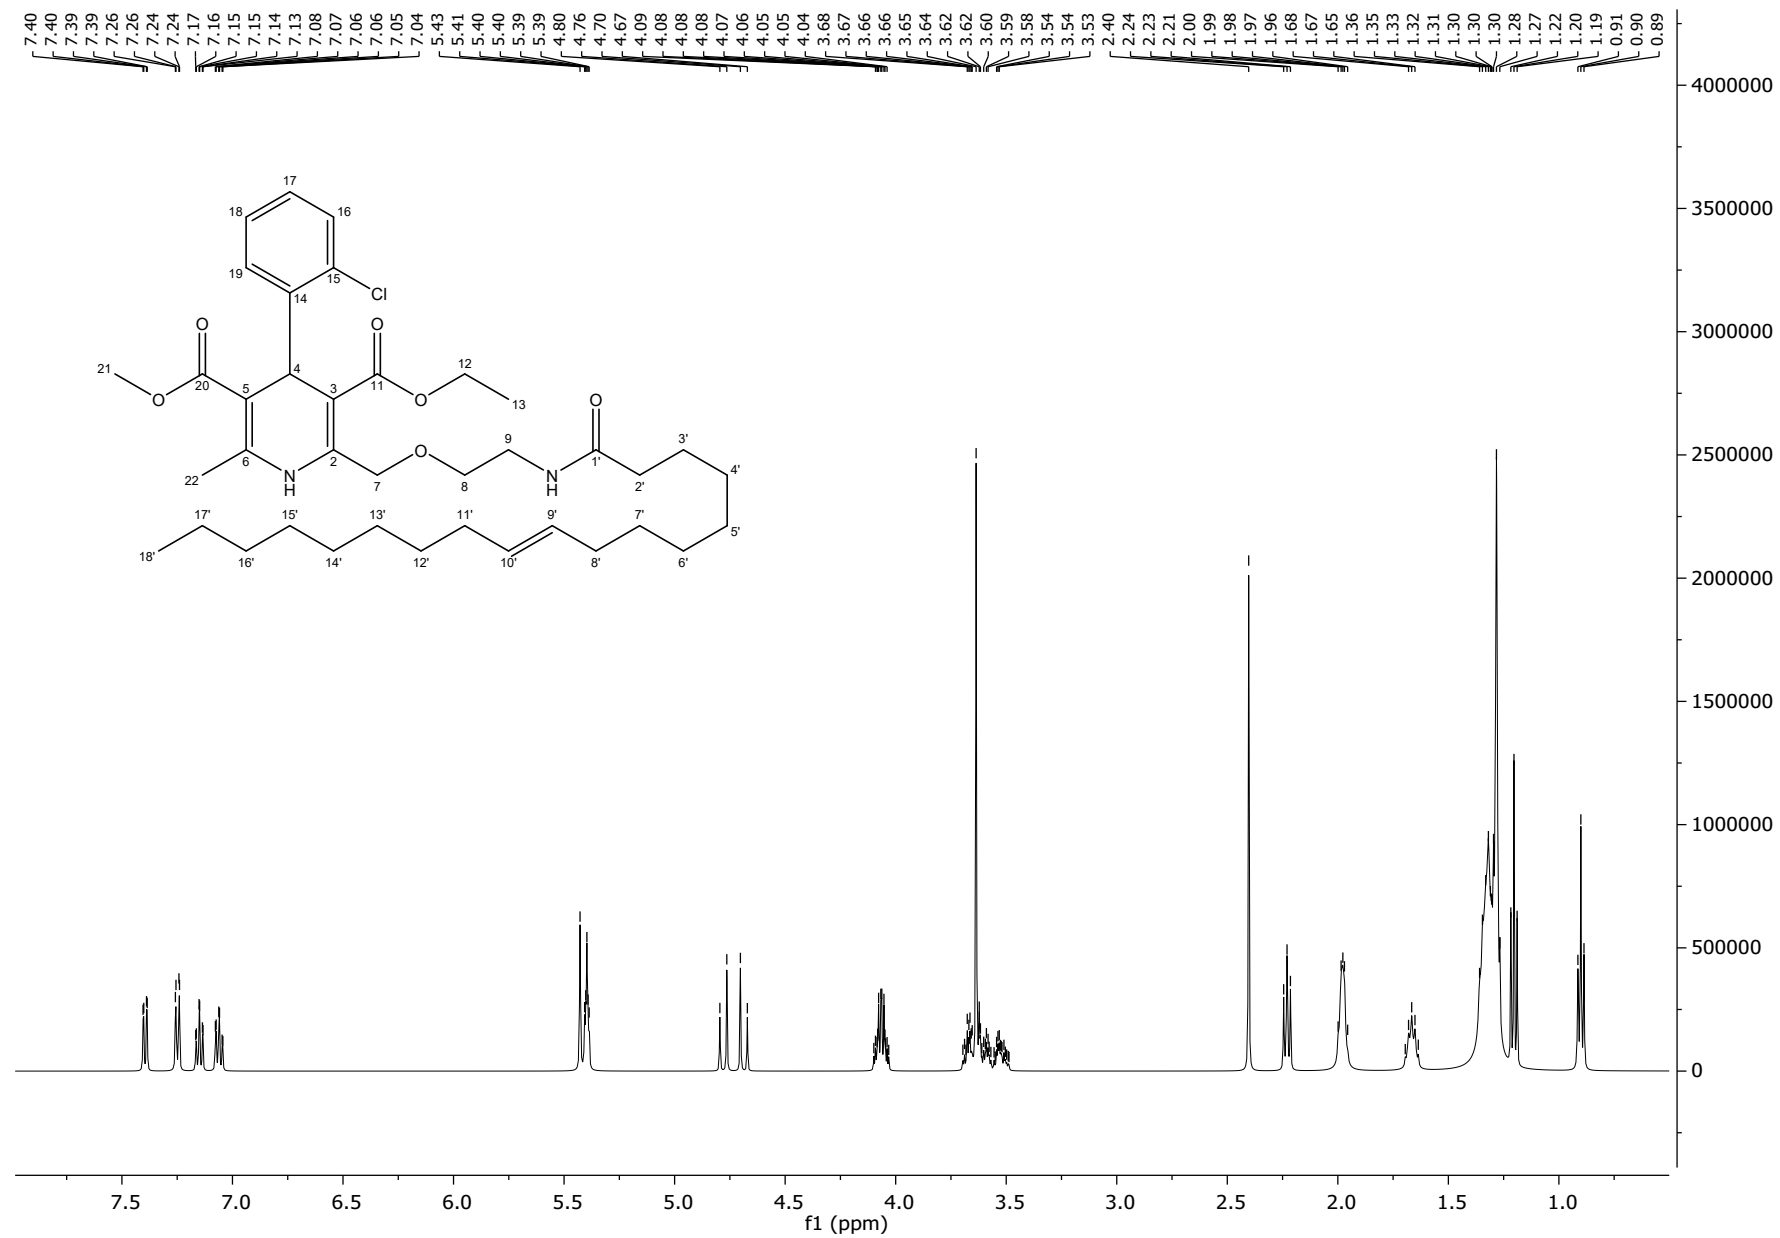

Compuesto 4j

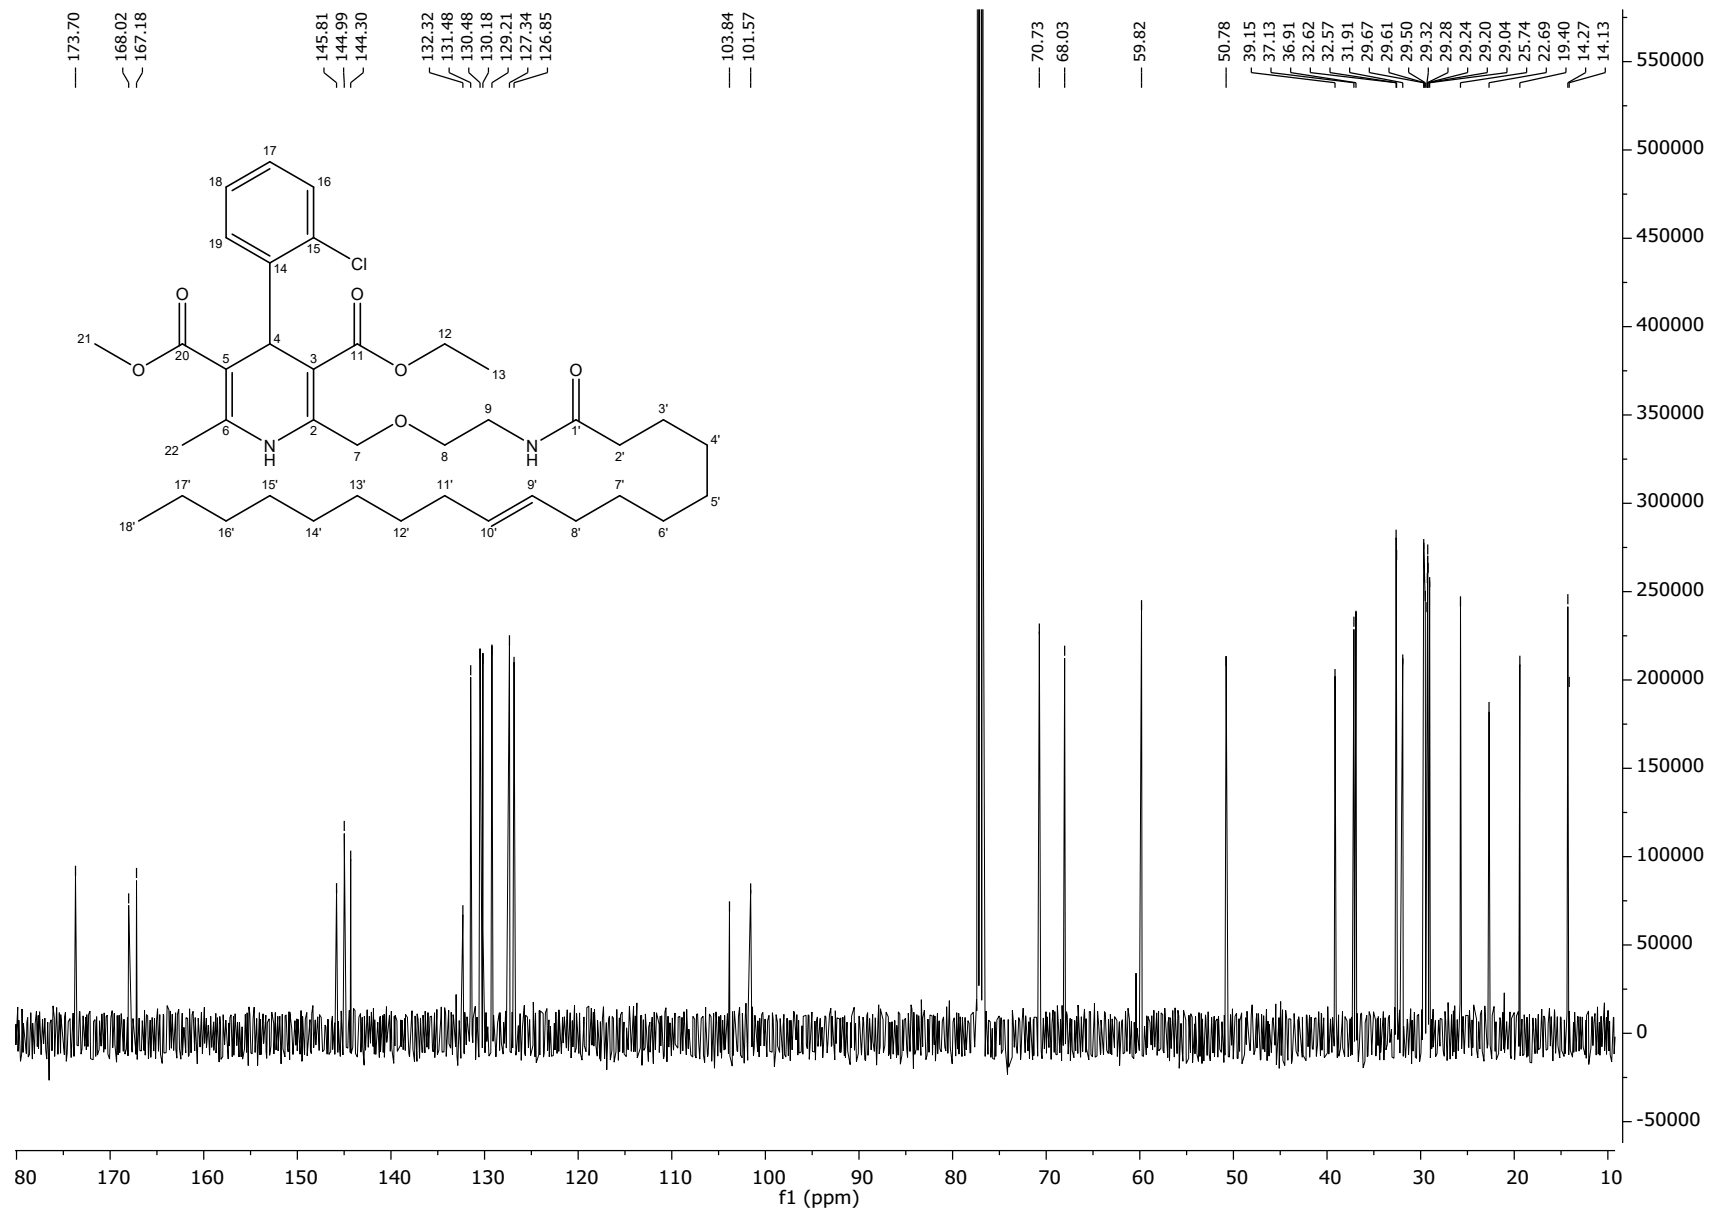

# Compound 4k

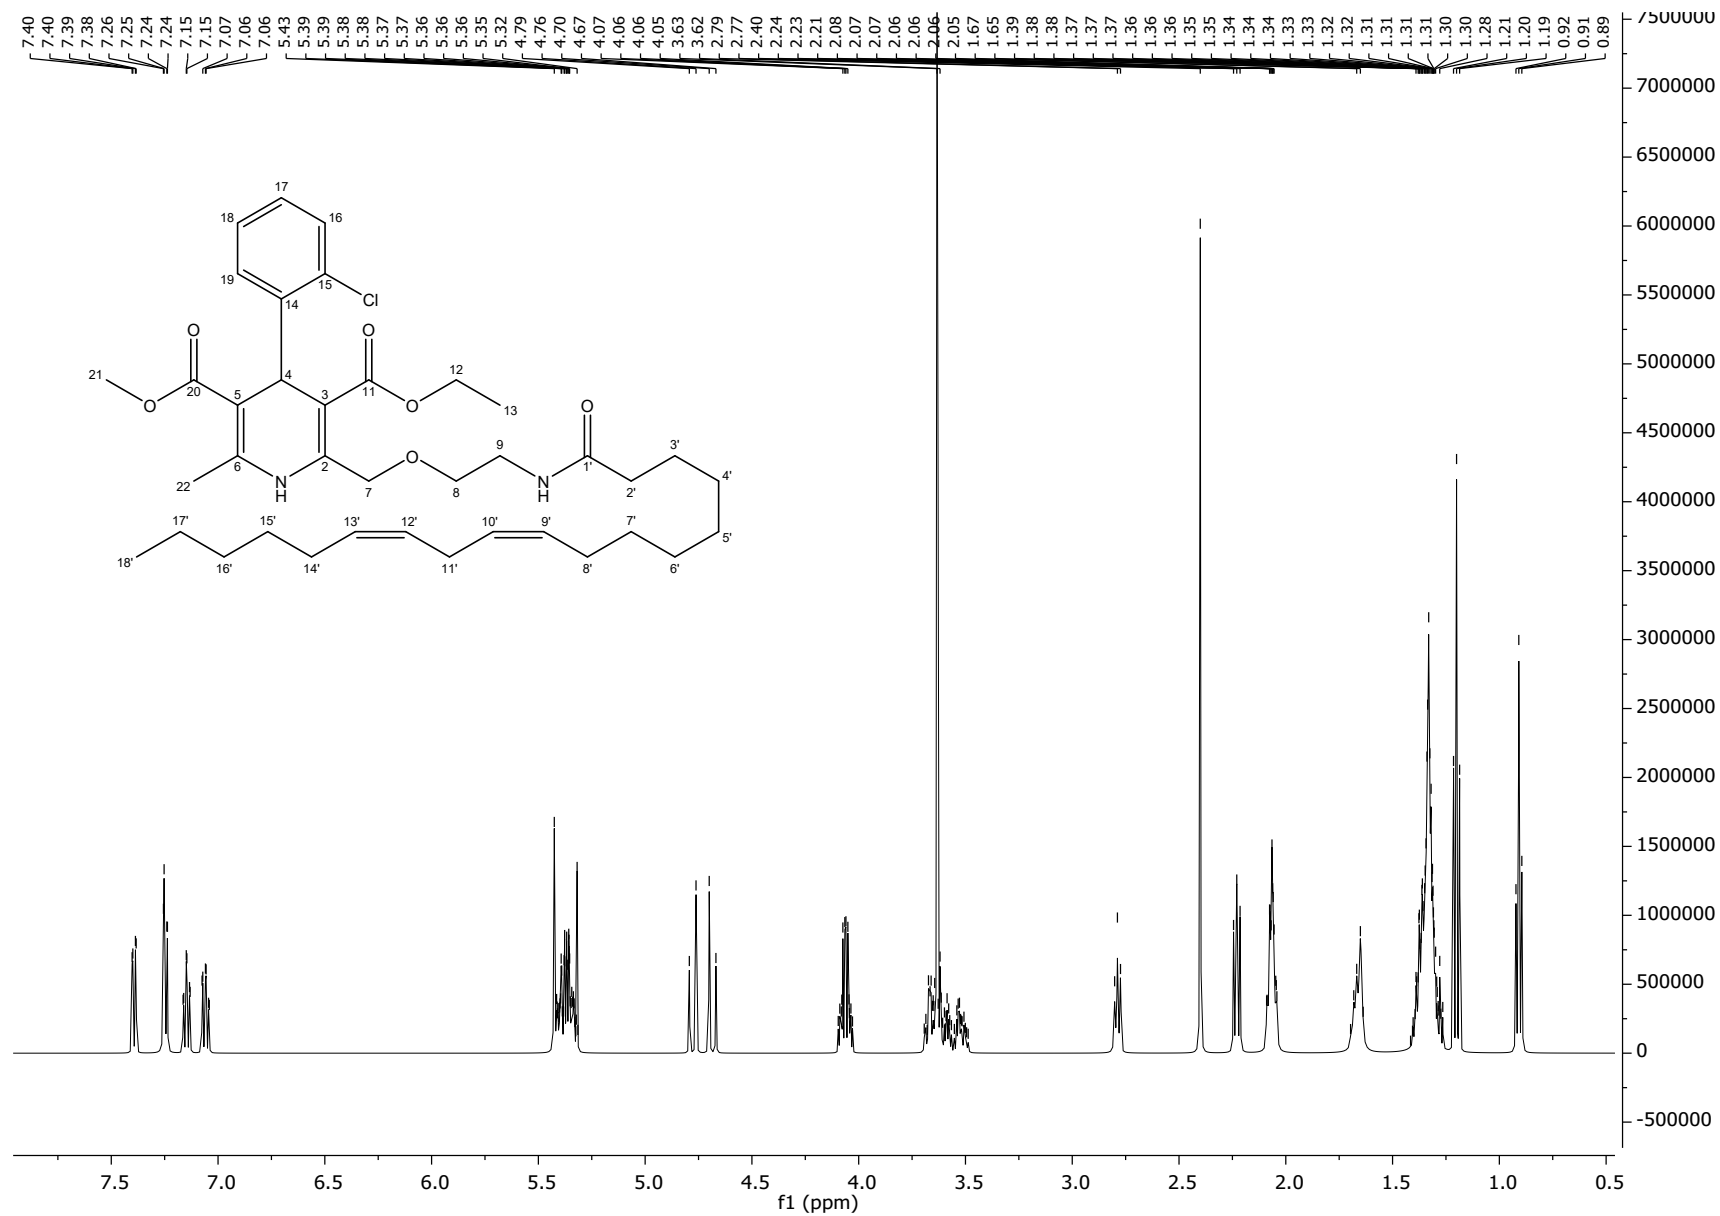



# Compuesto 4k

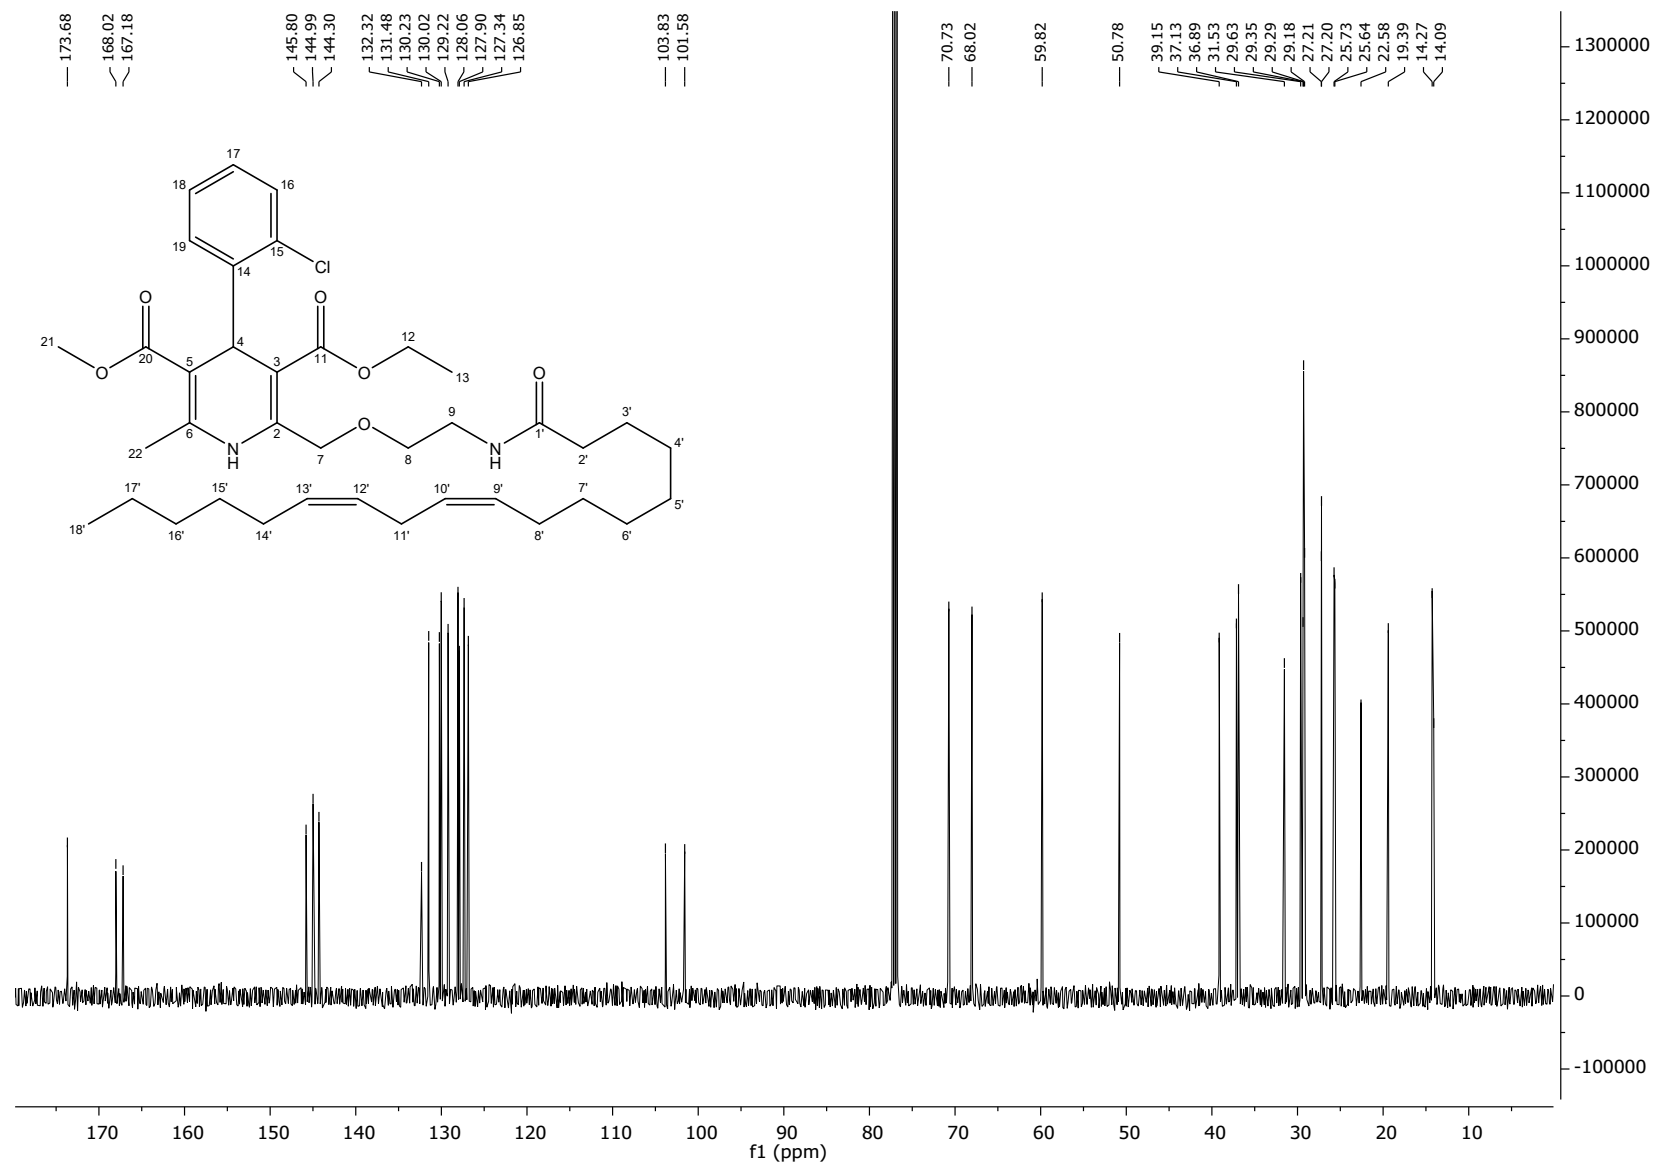

# Compound 4I

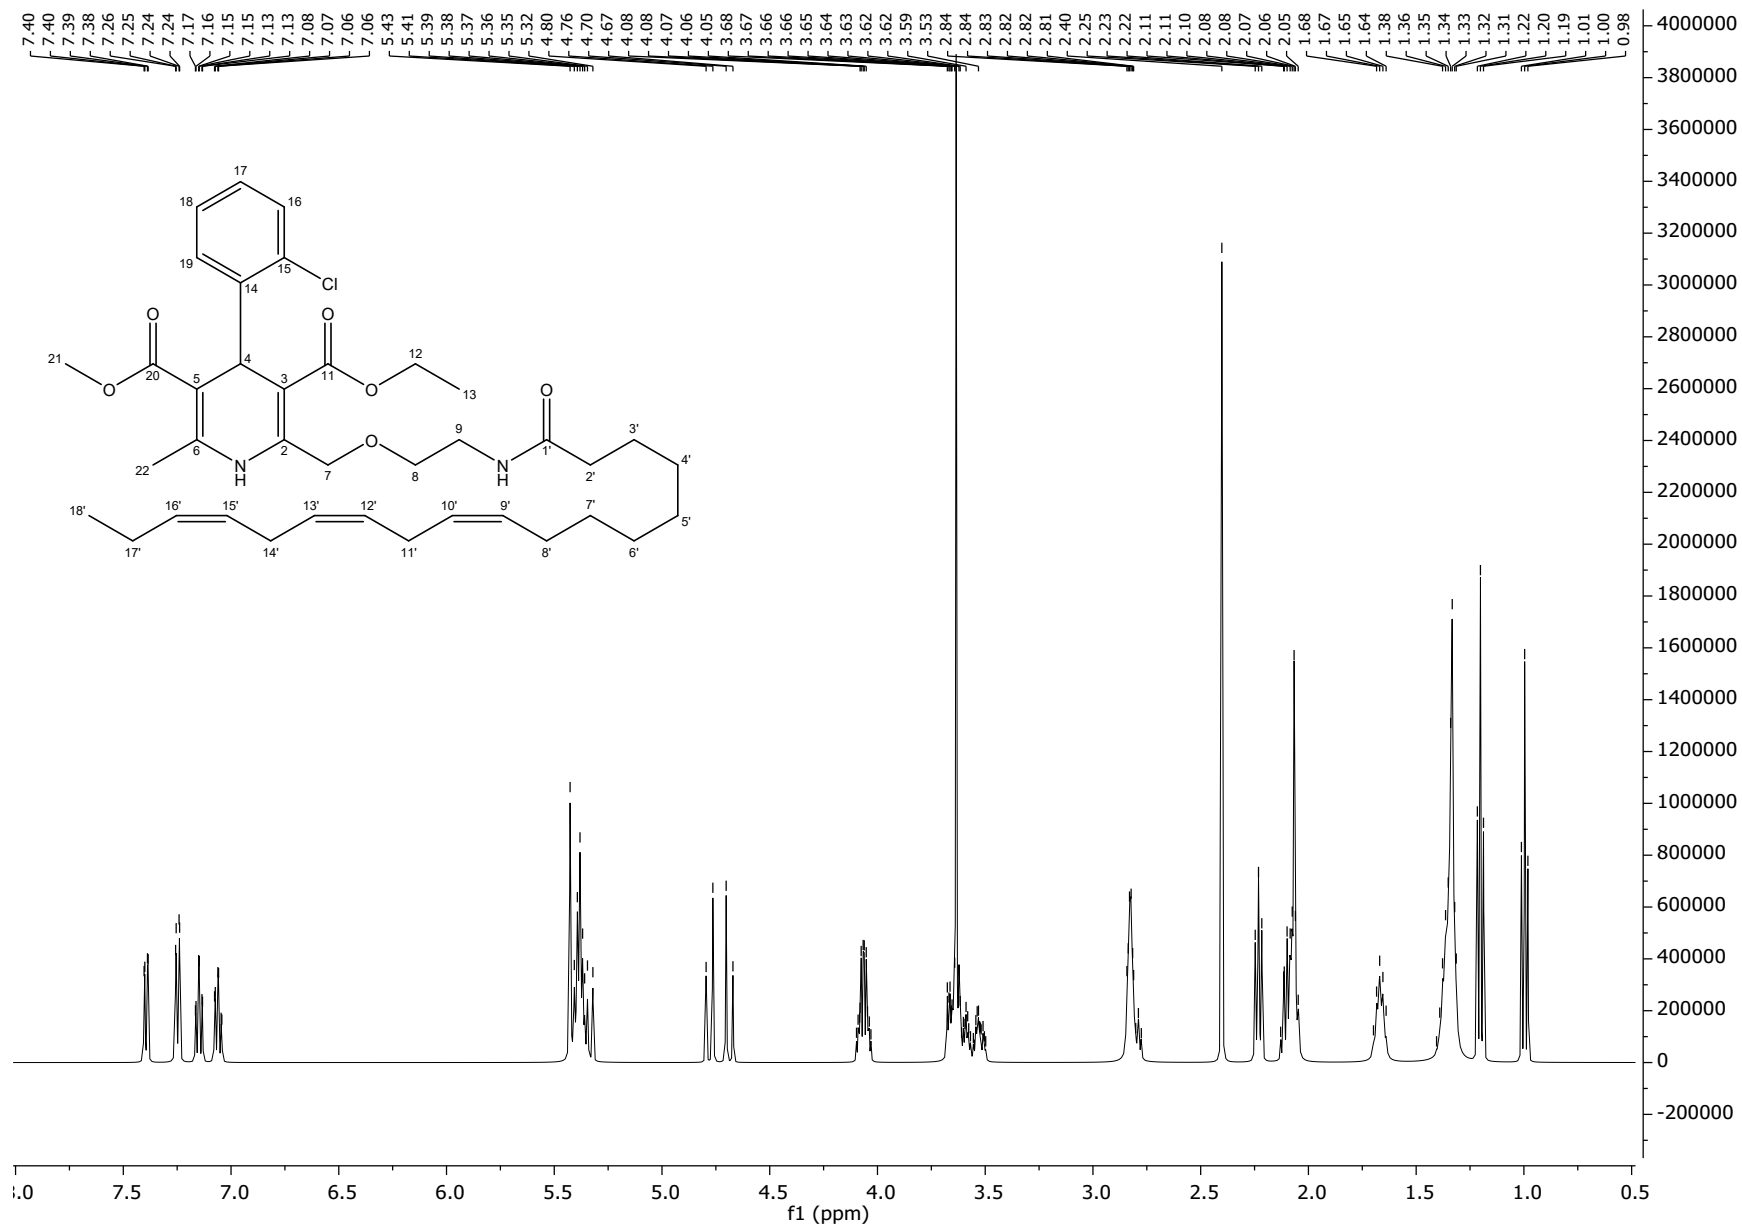

# Compuesto 4l

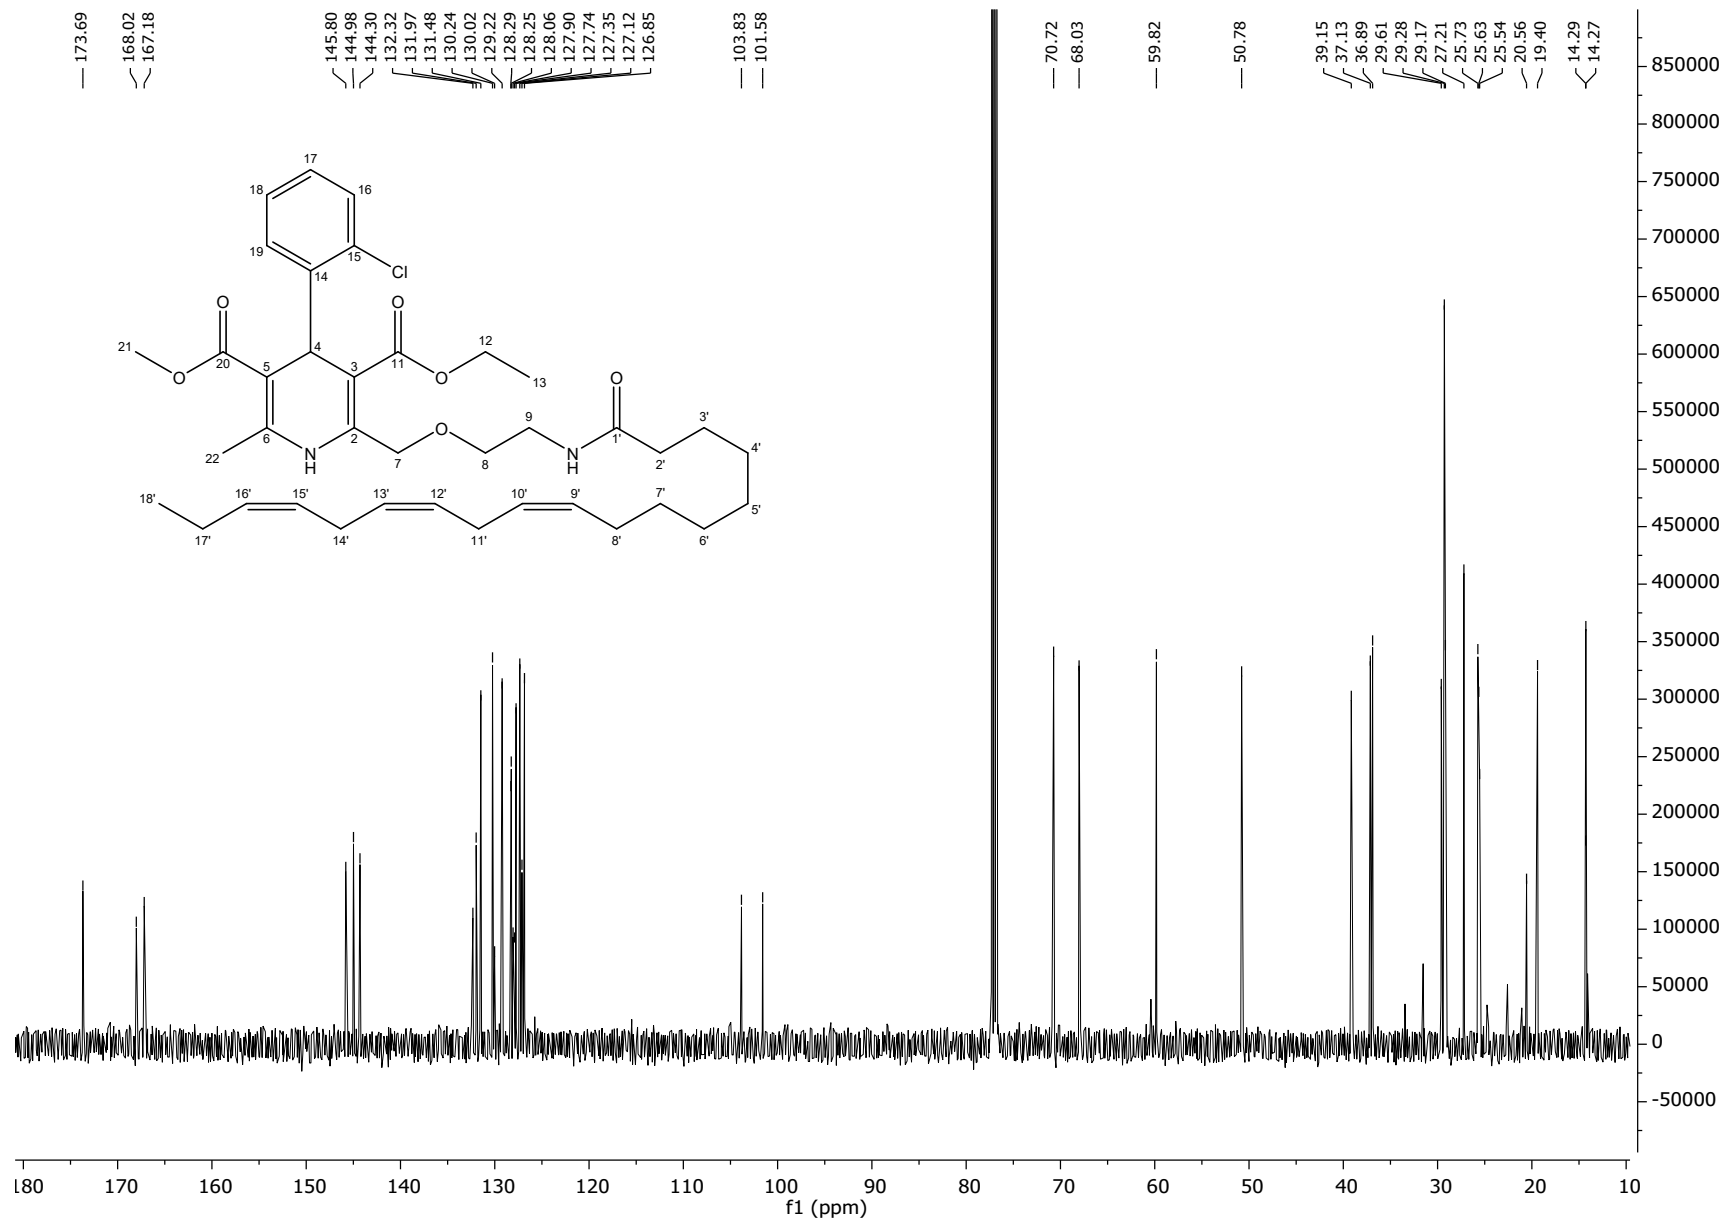

# Compound 4m

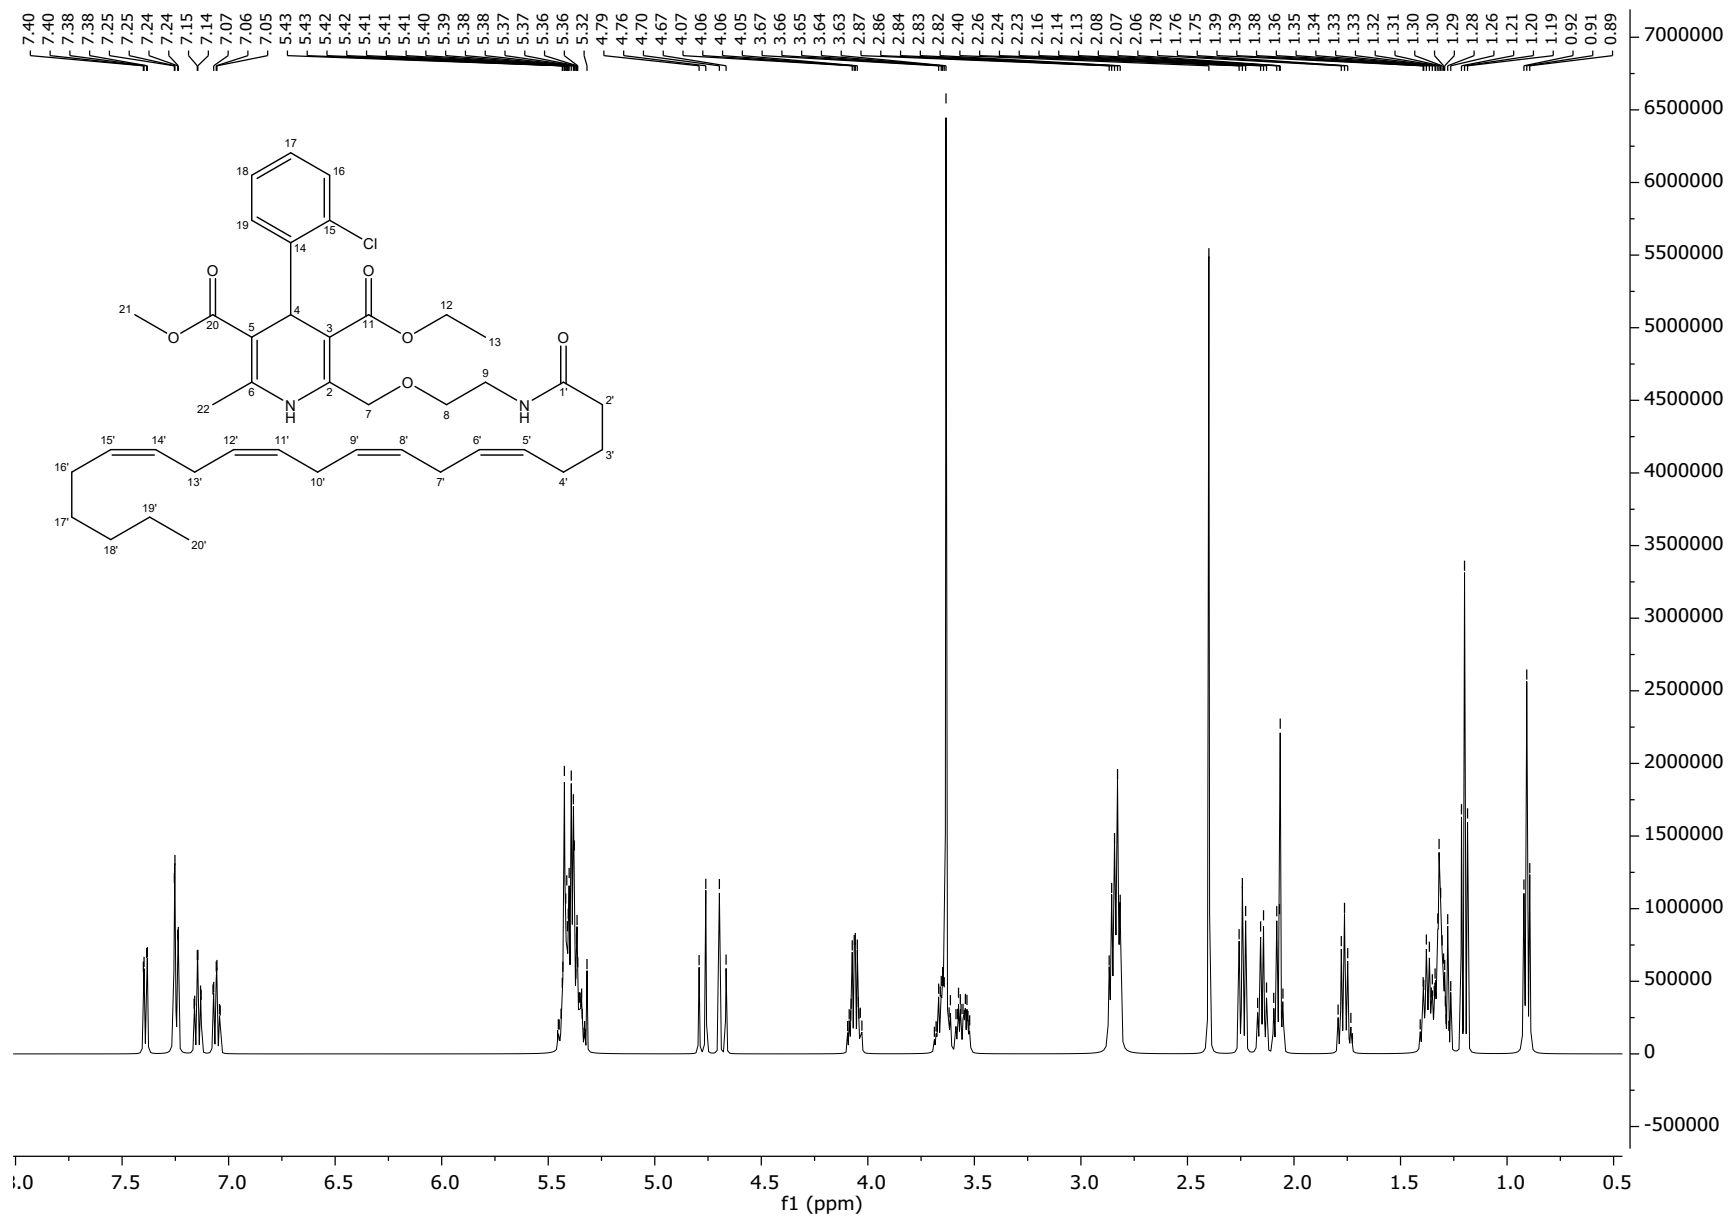

# Compuesto 4m

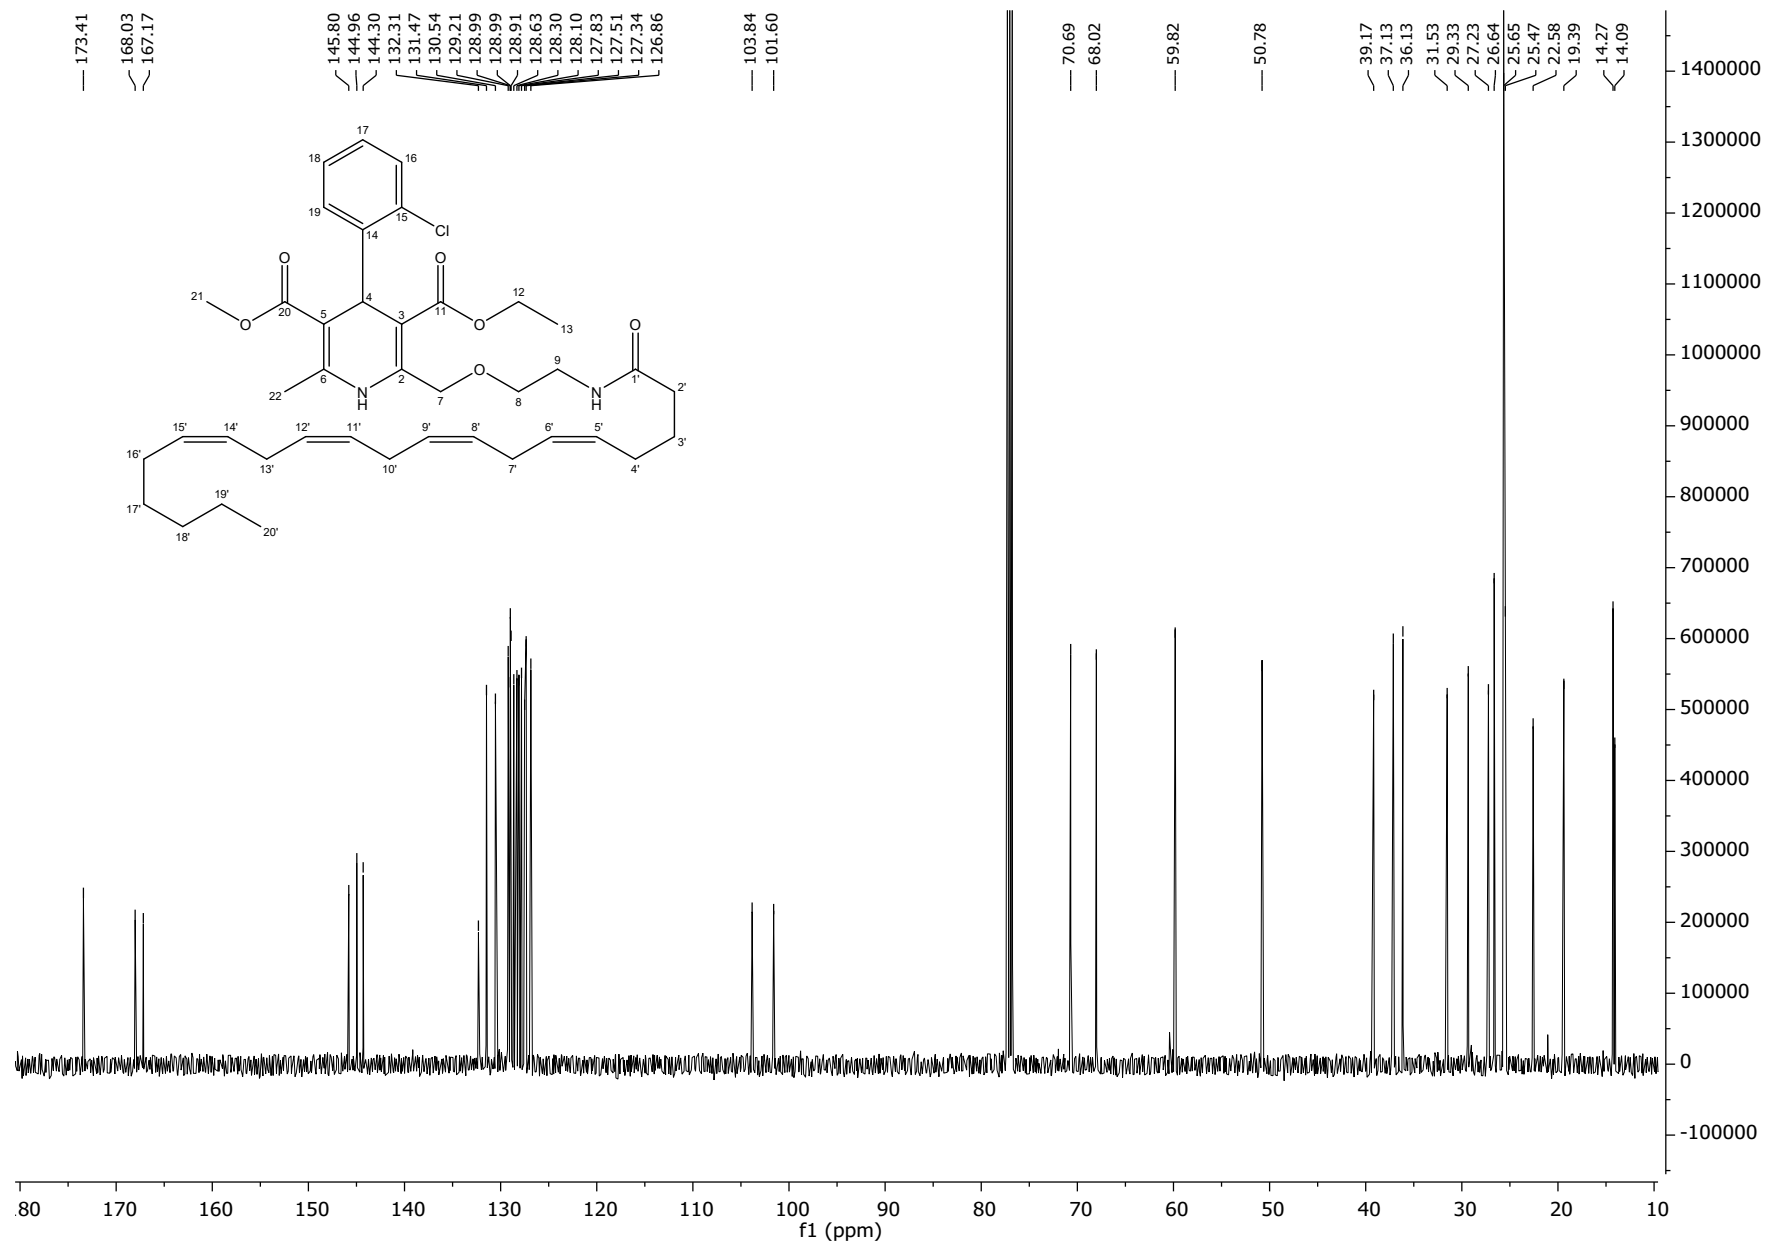

# Compound 5a

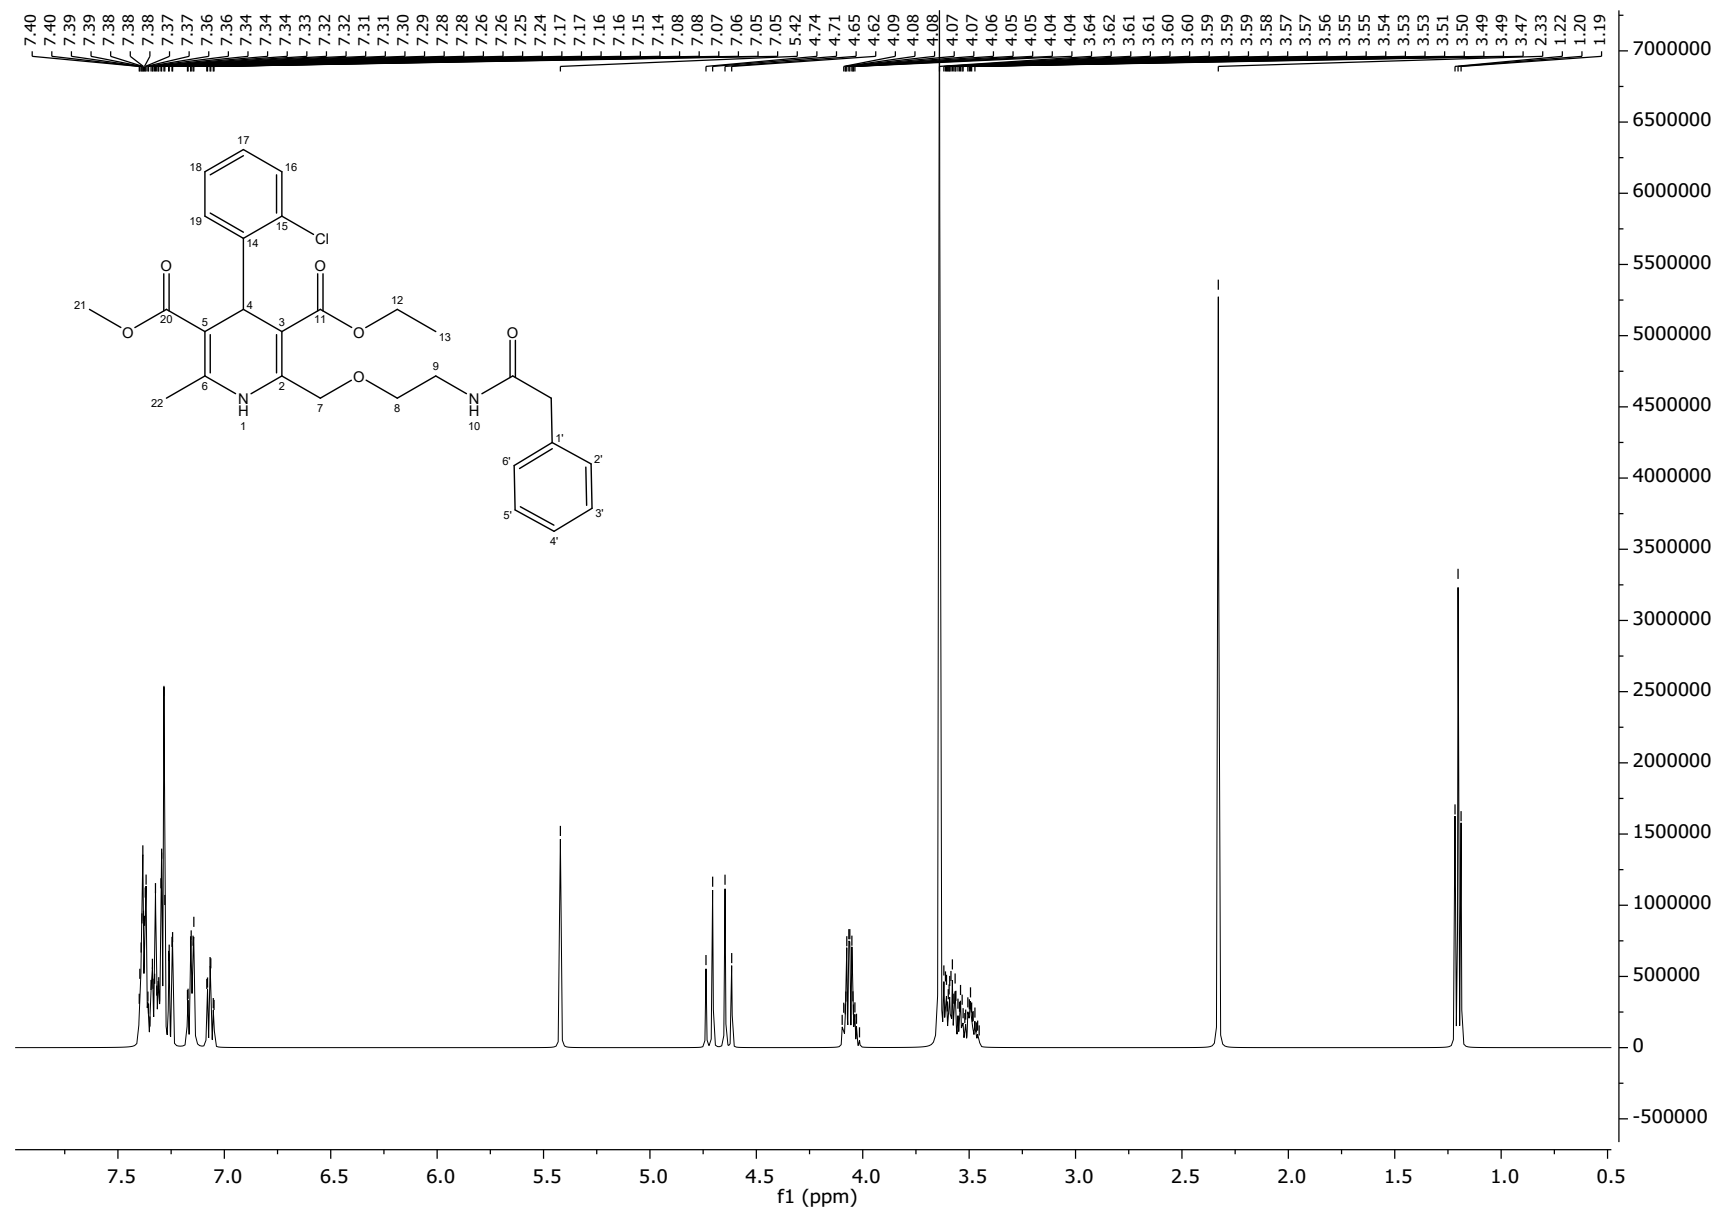

# Compuesto 5a

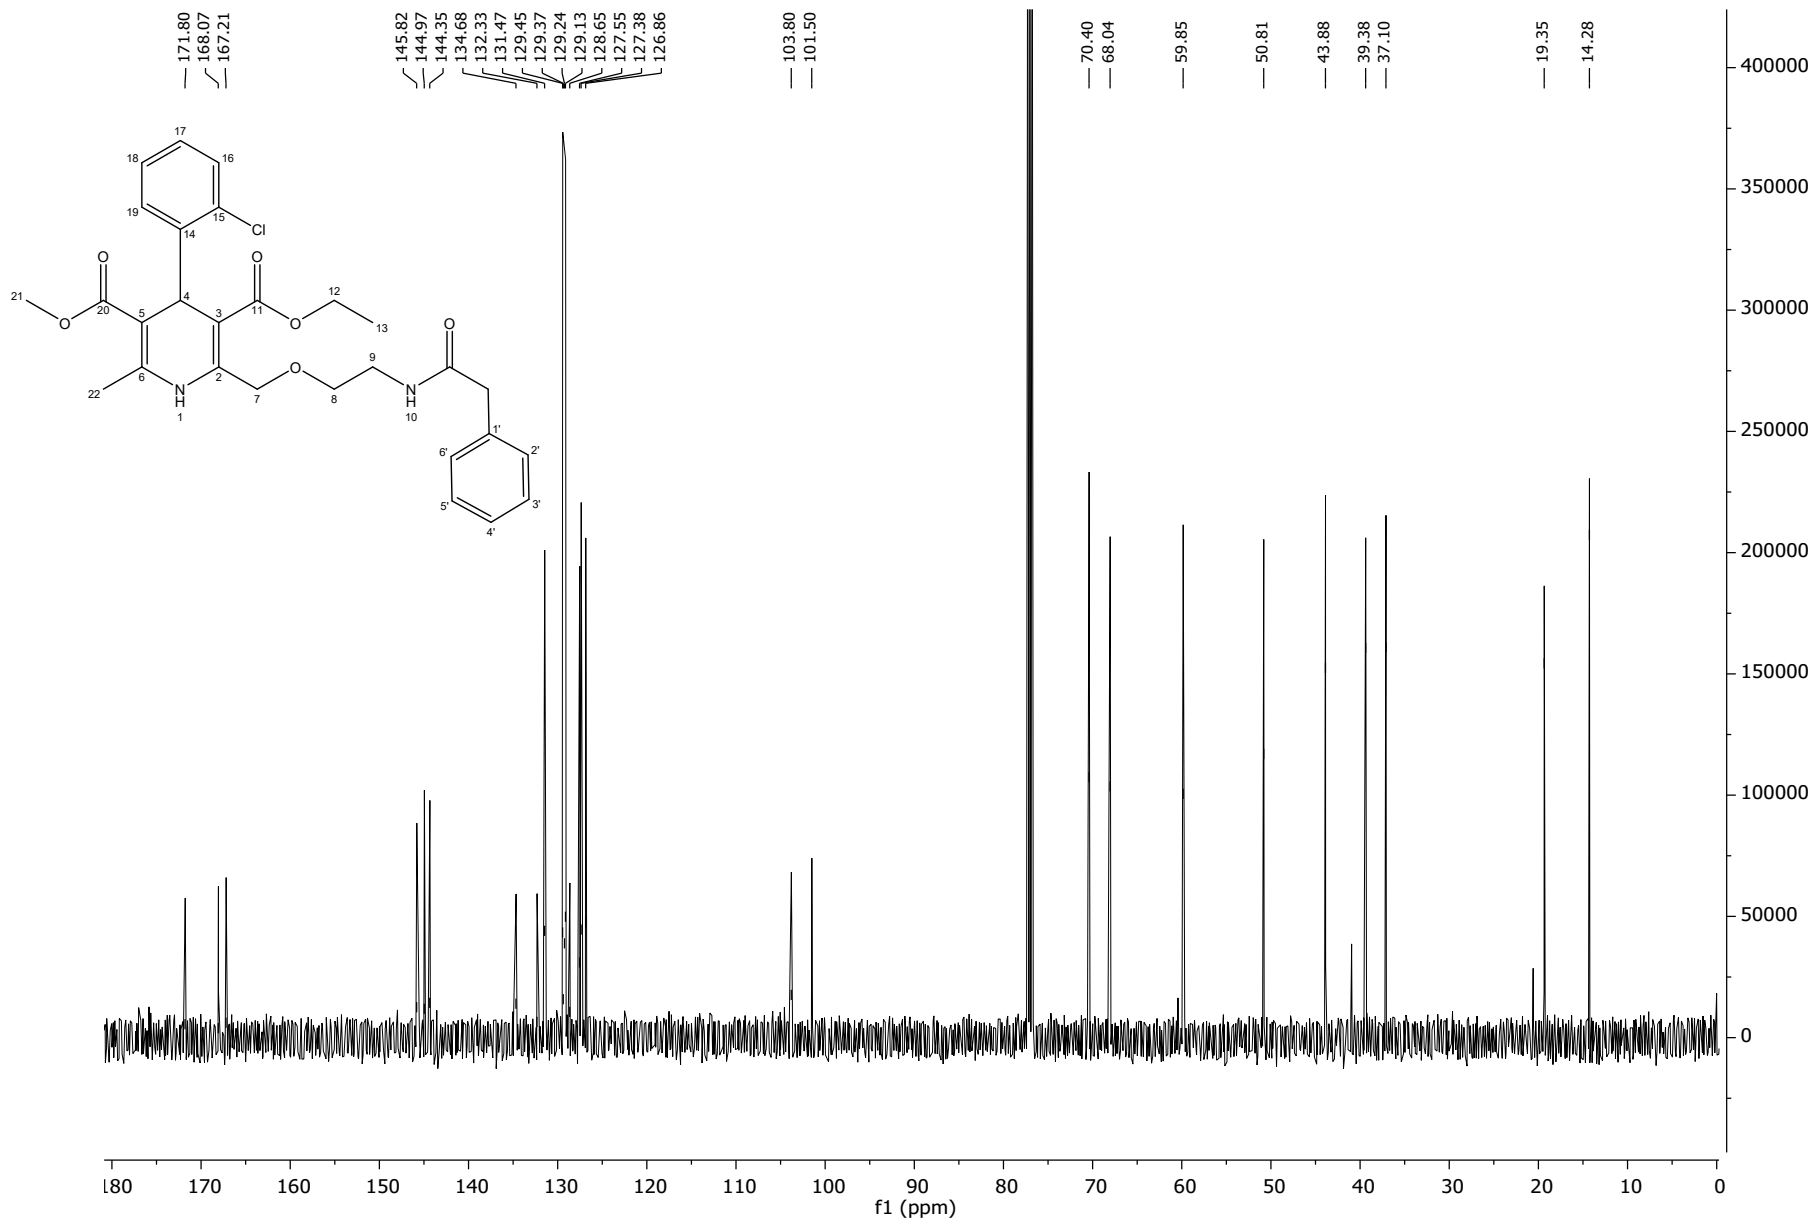

Compound 5b

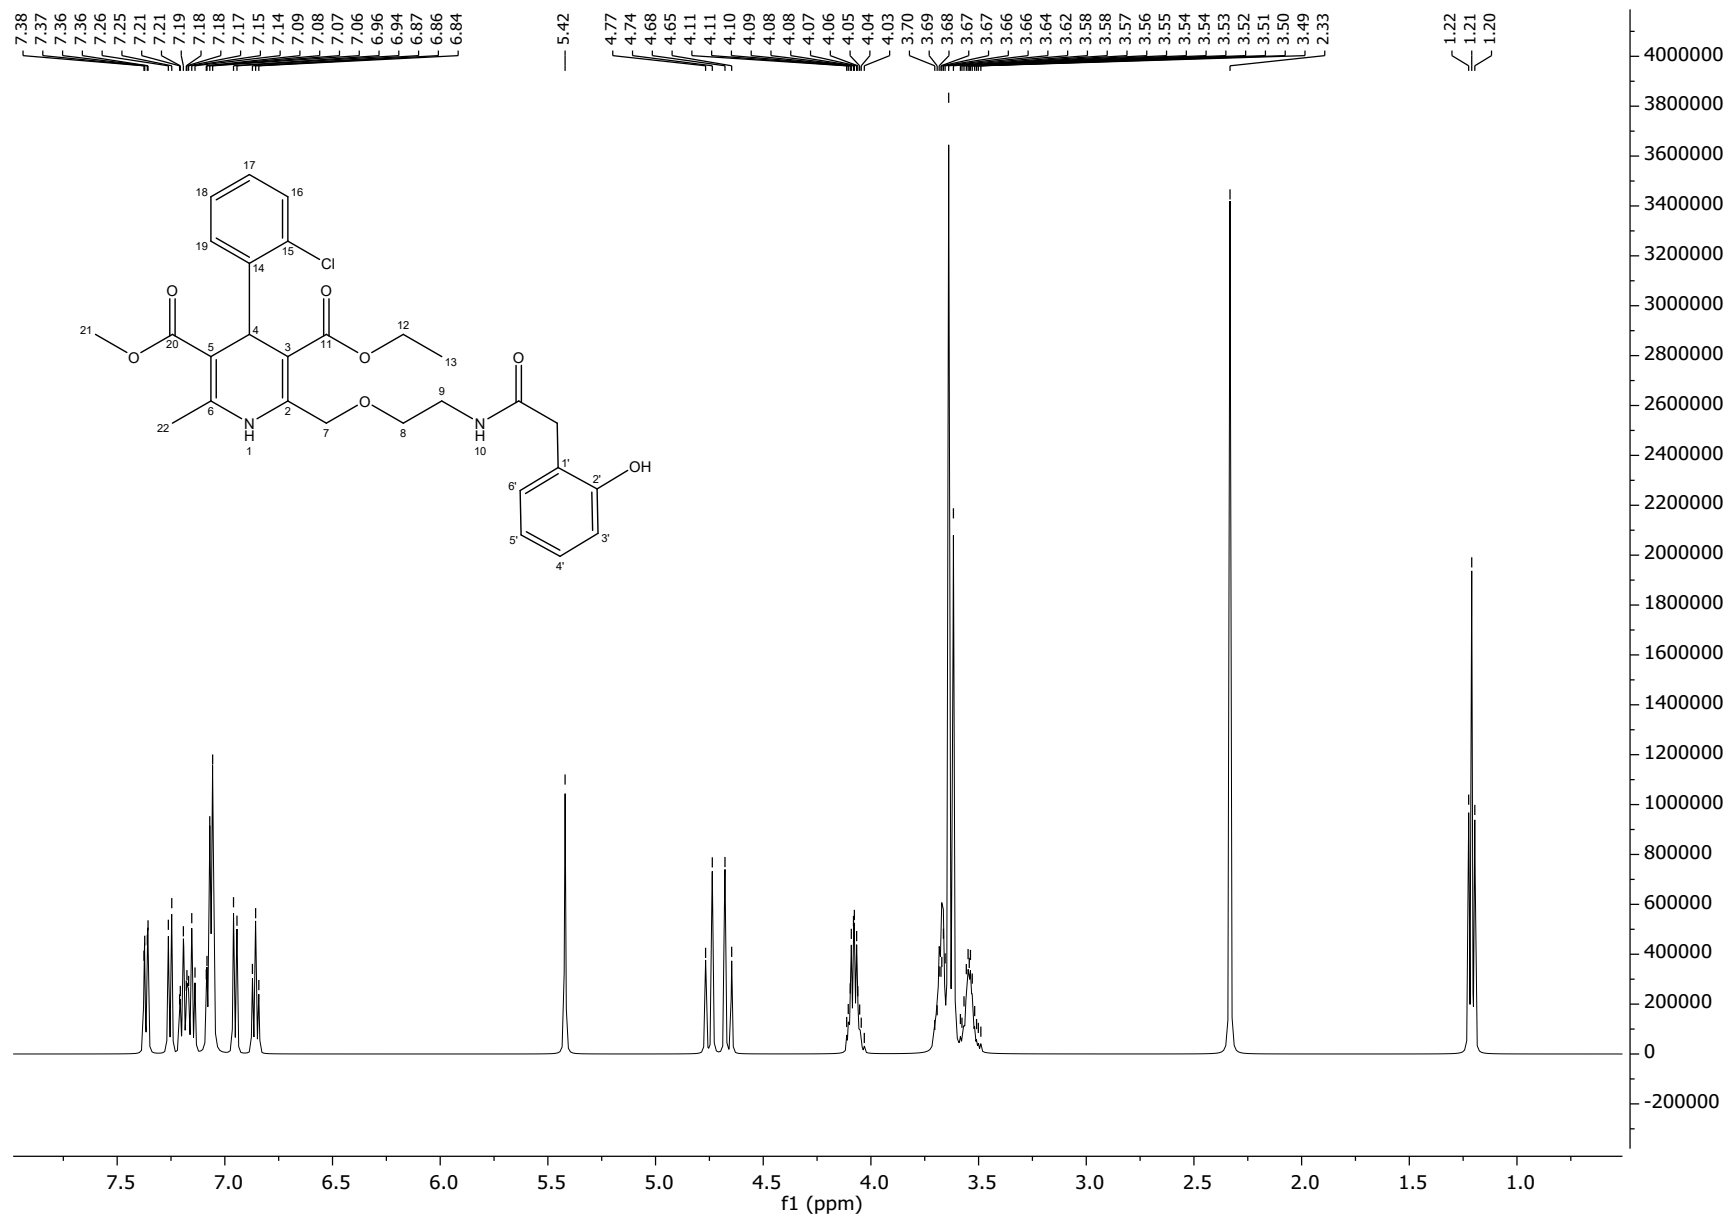



Compuesto 5b

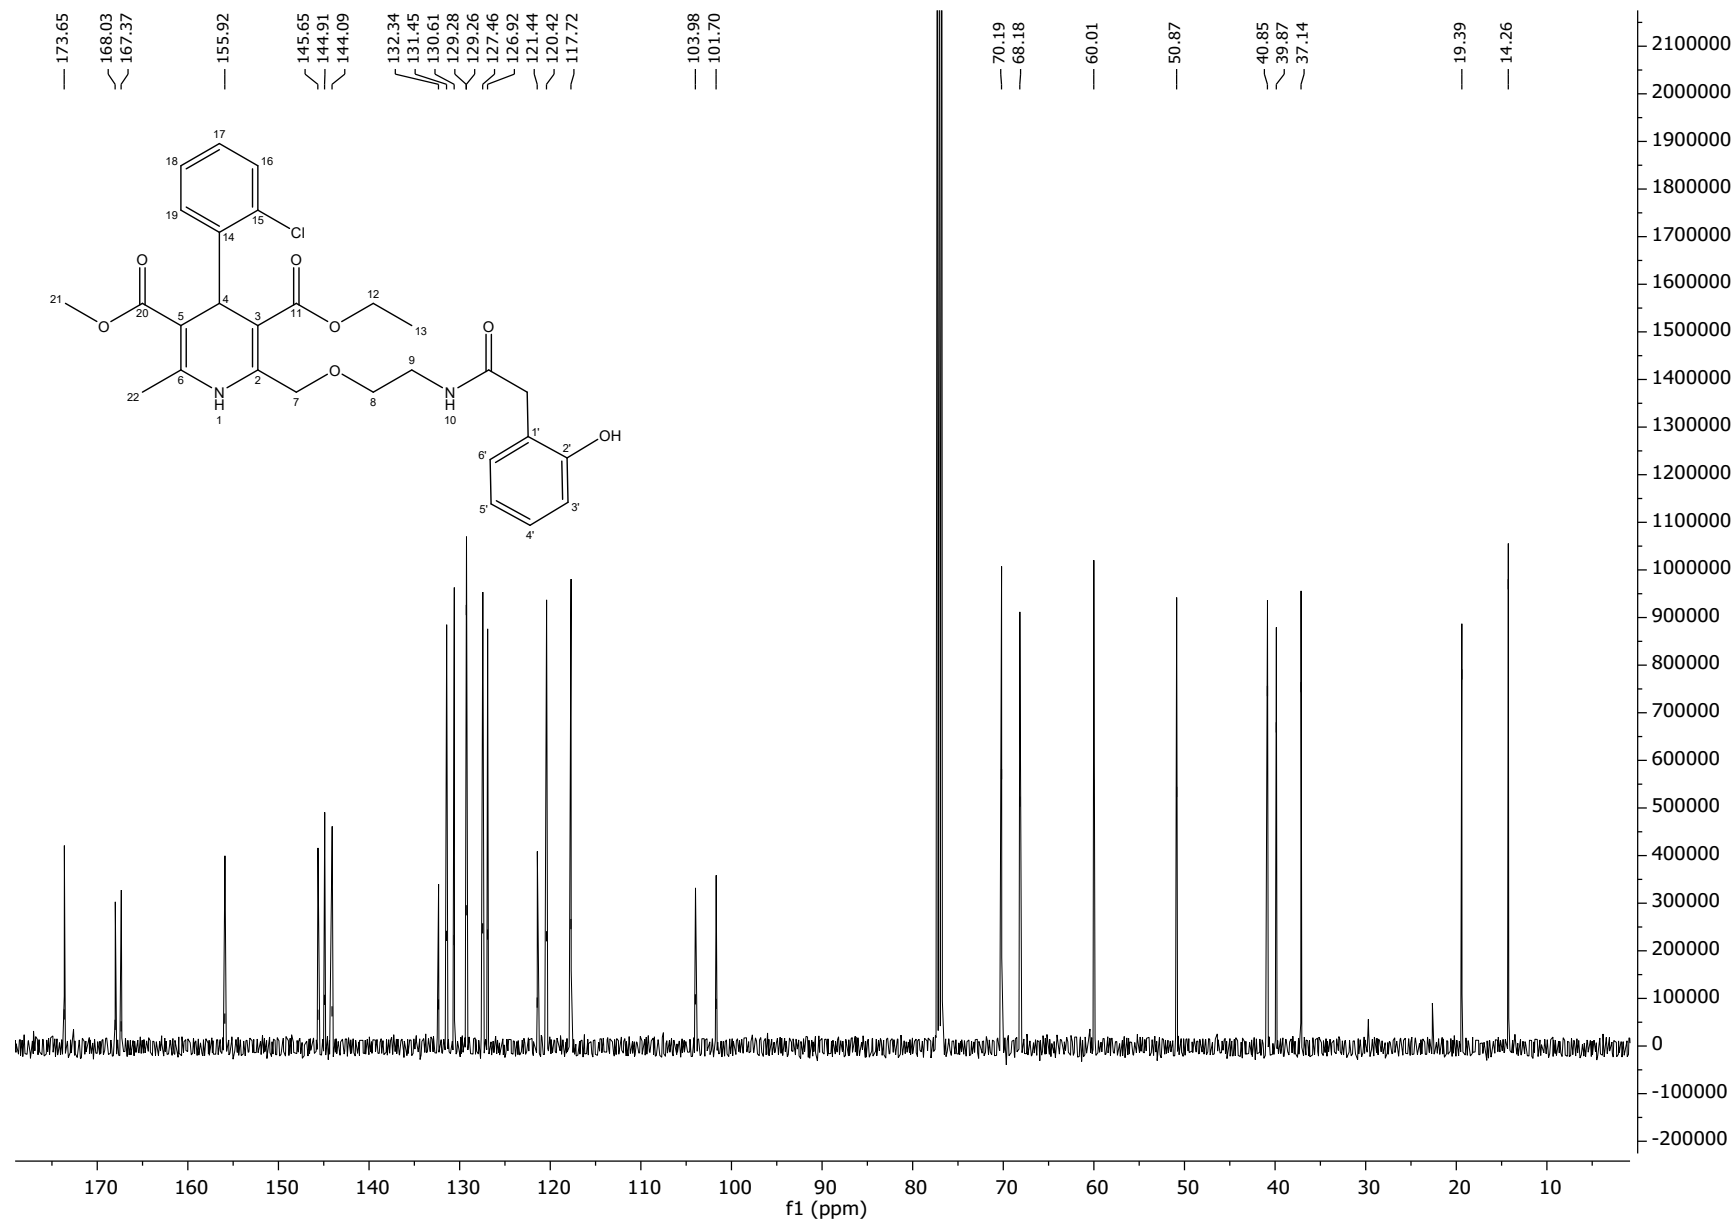

# Compound 5c

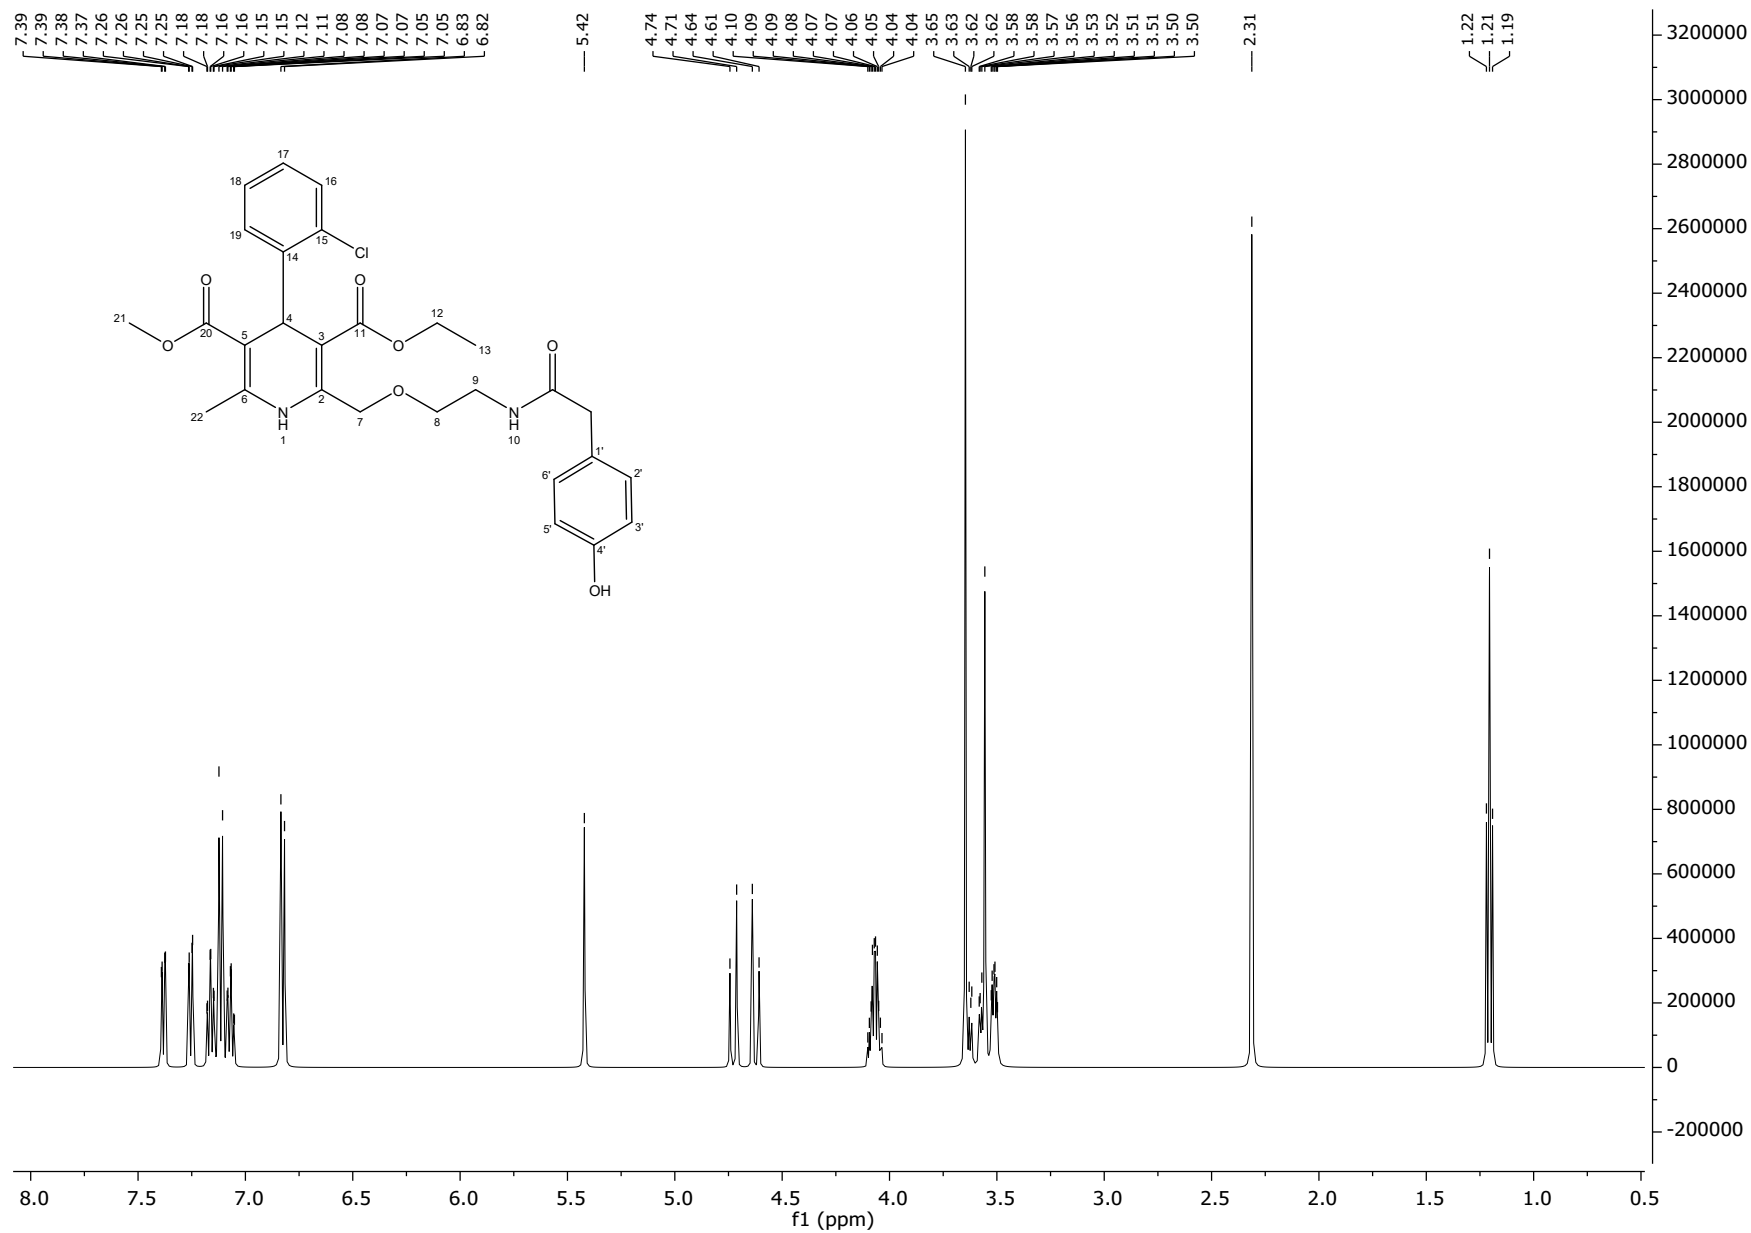

Compuesto 5c

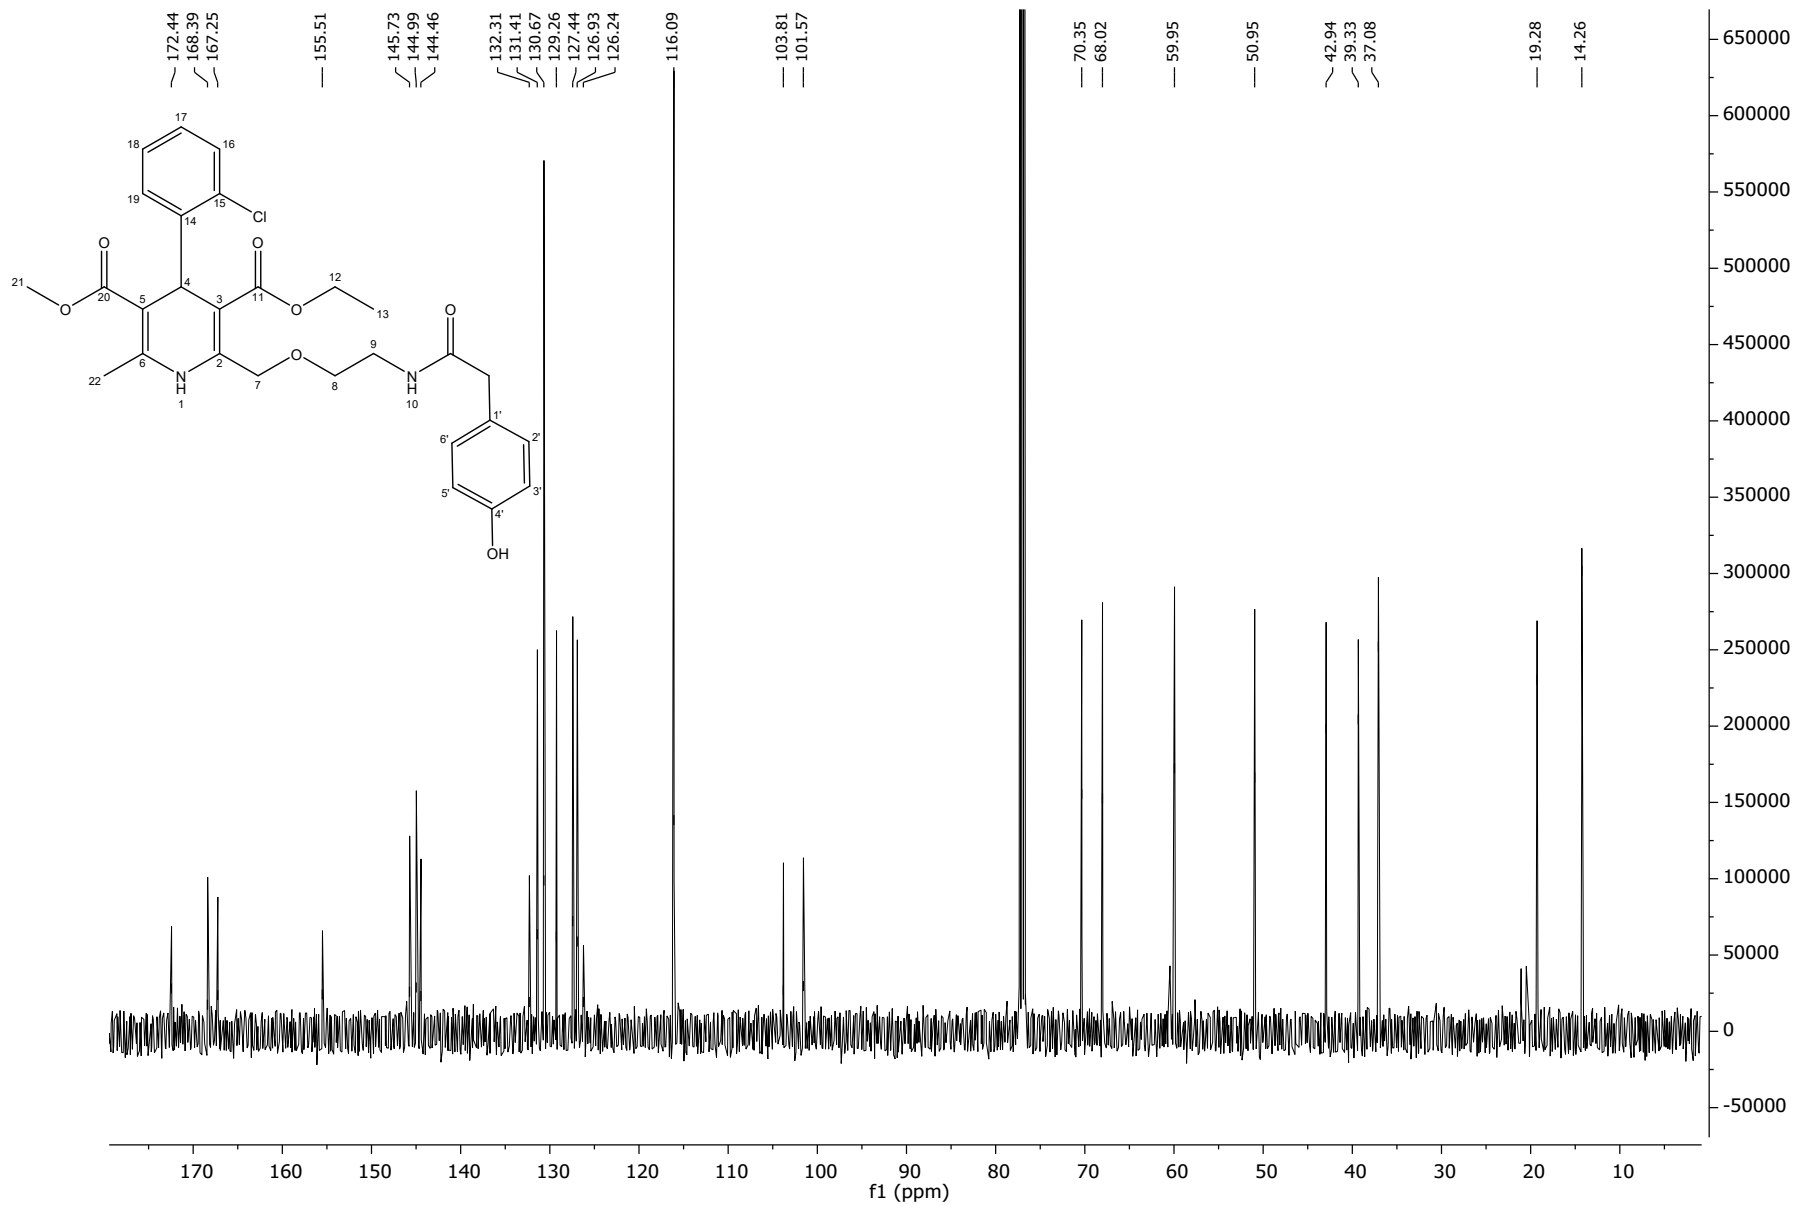

Compound 5d

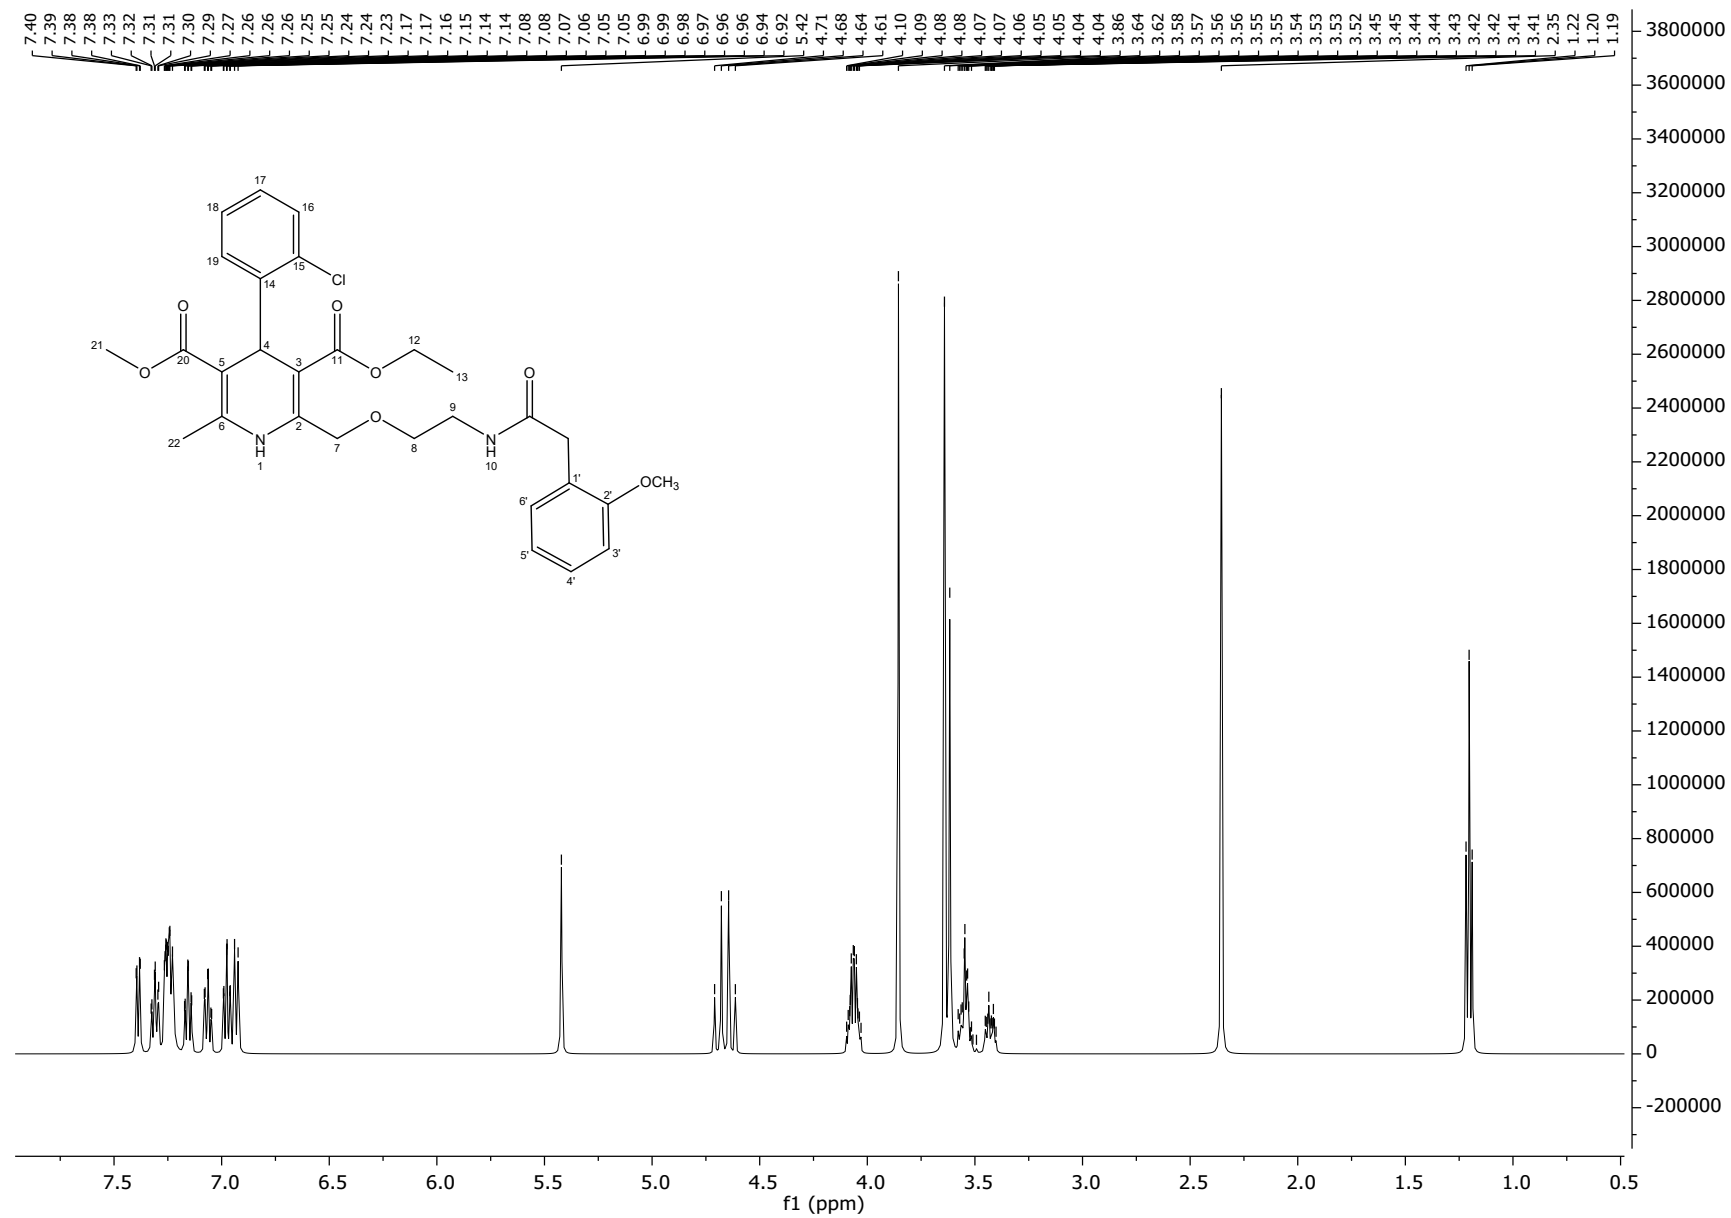

# Compuesto 5d

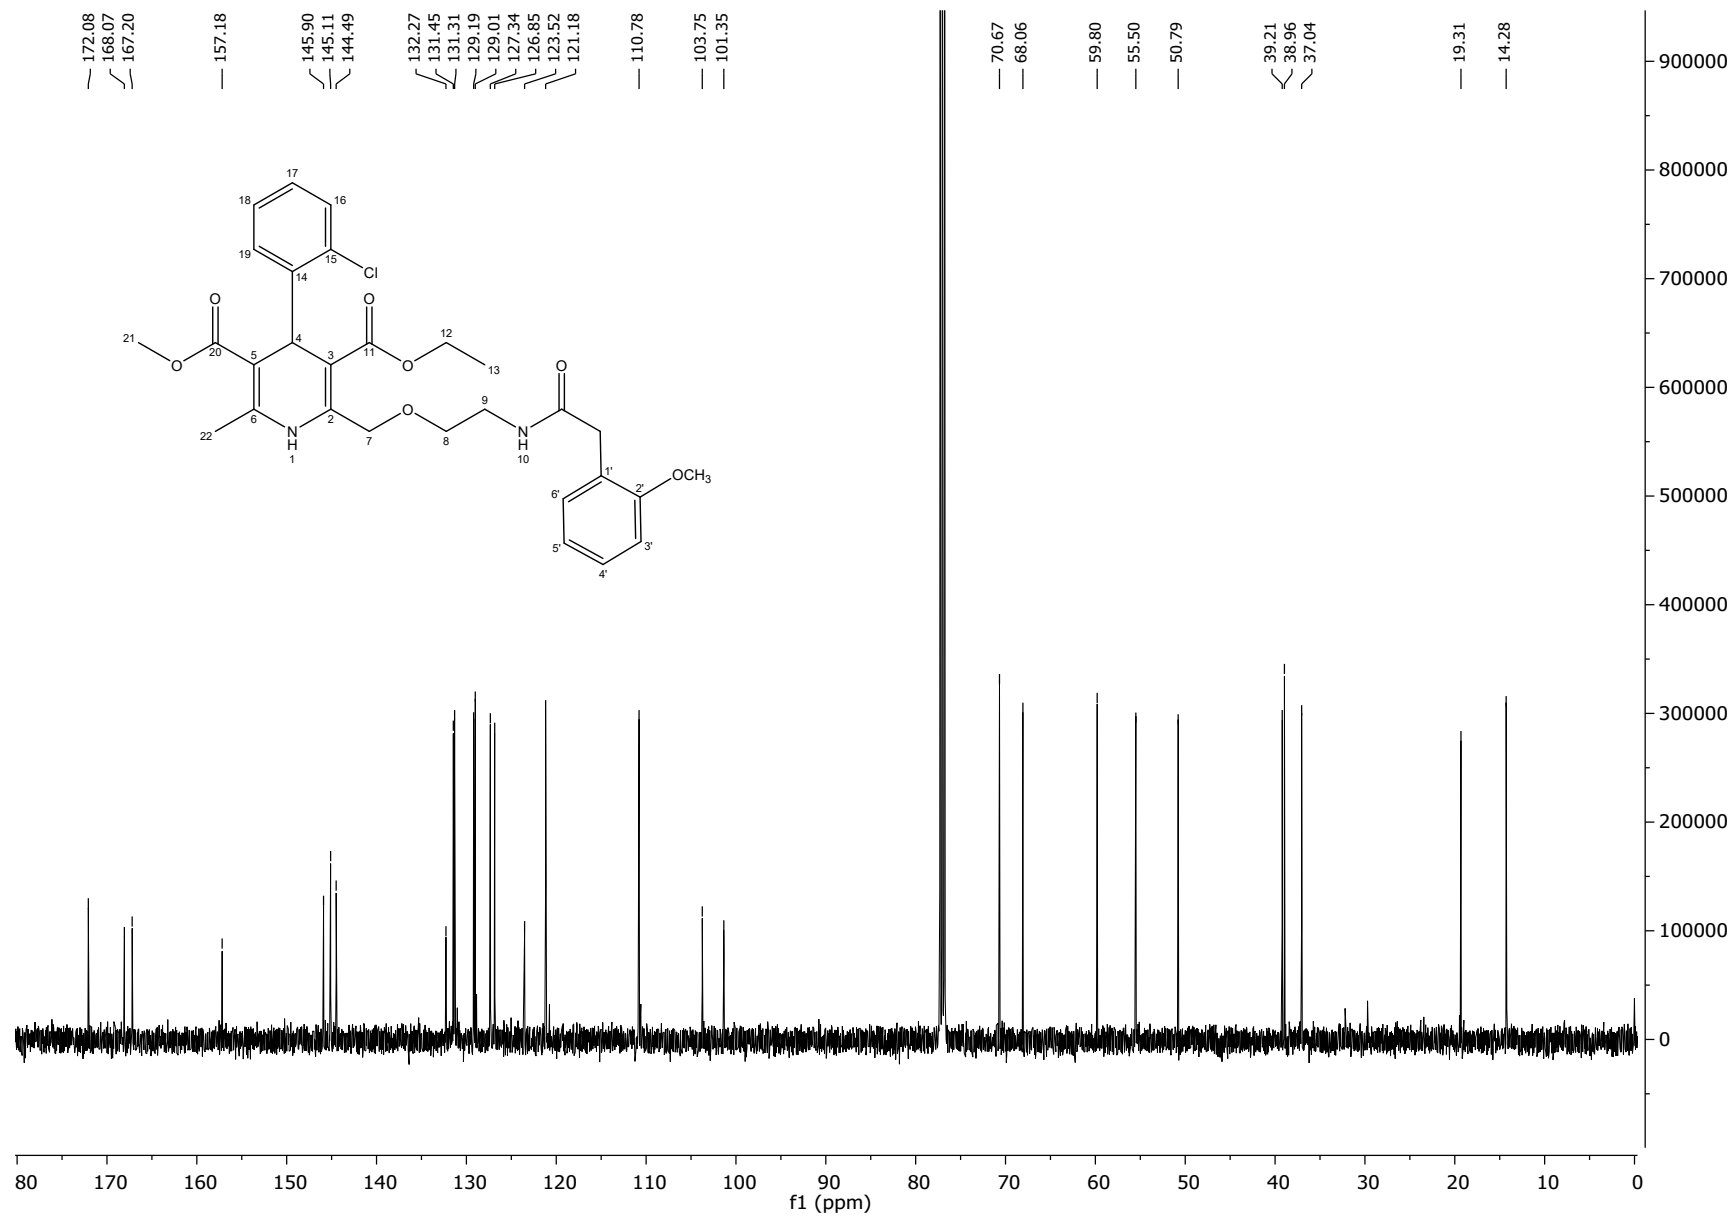

# Compound 5e

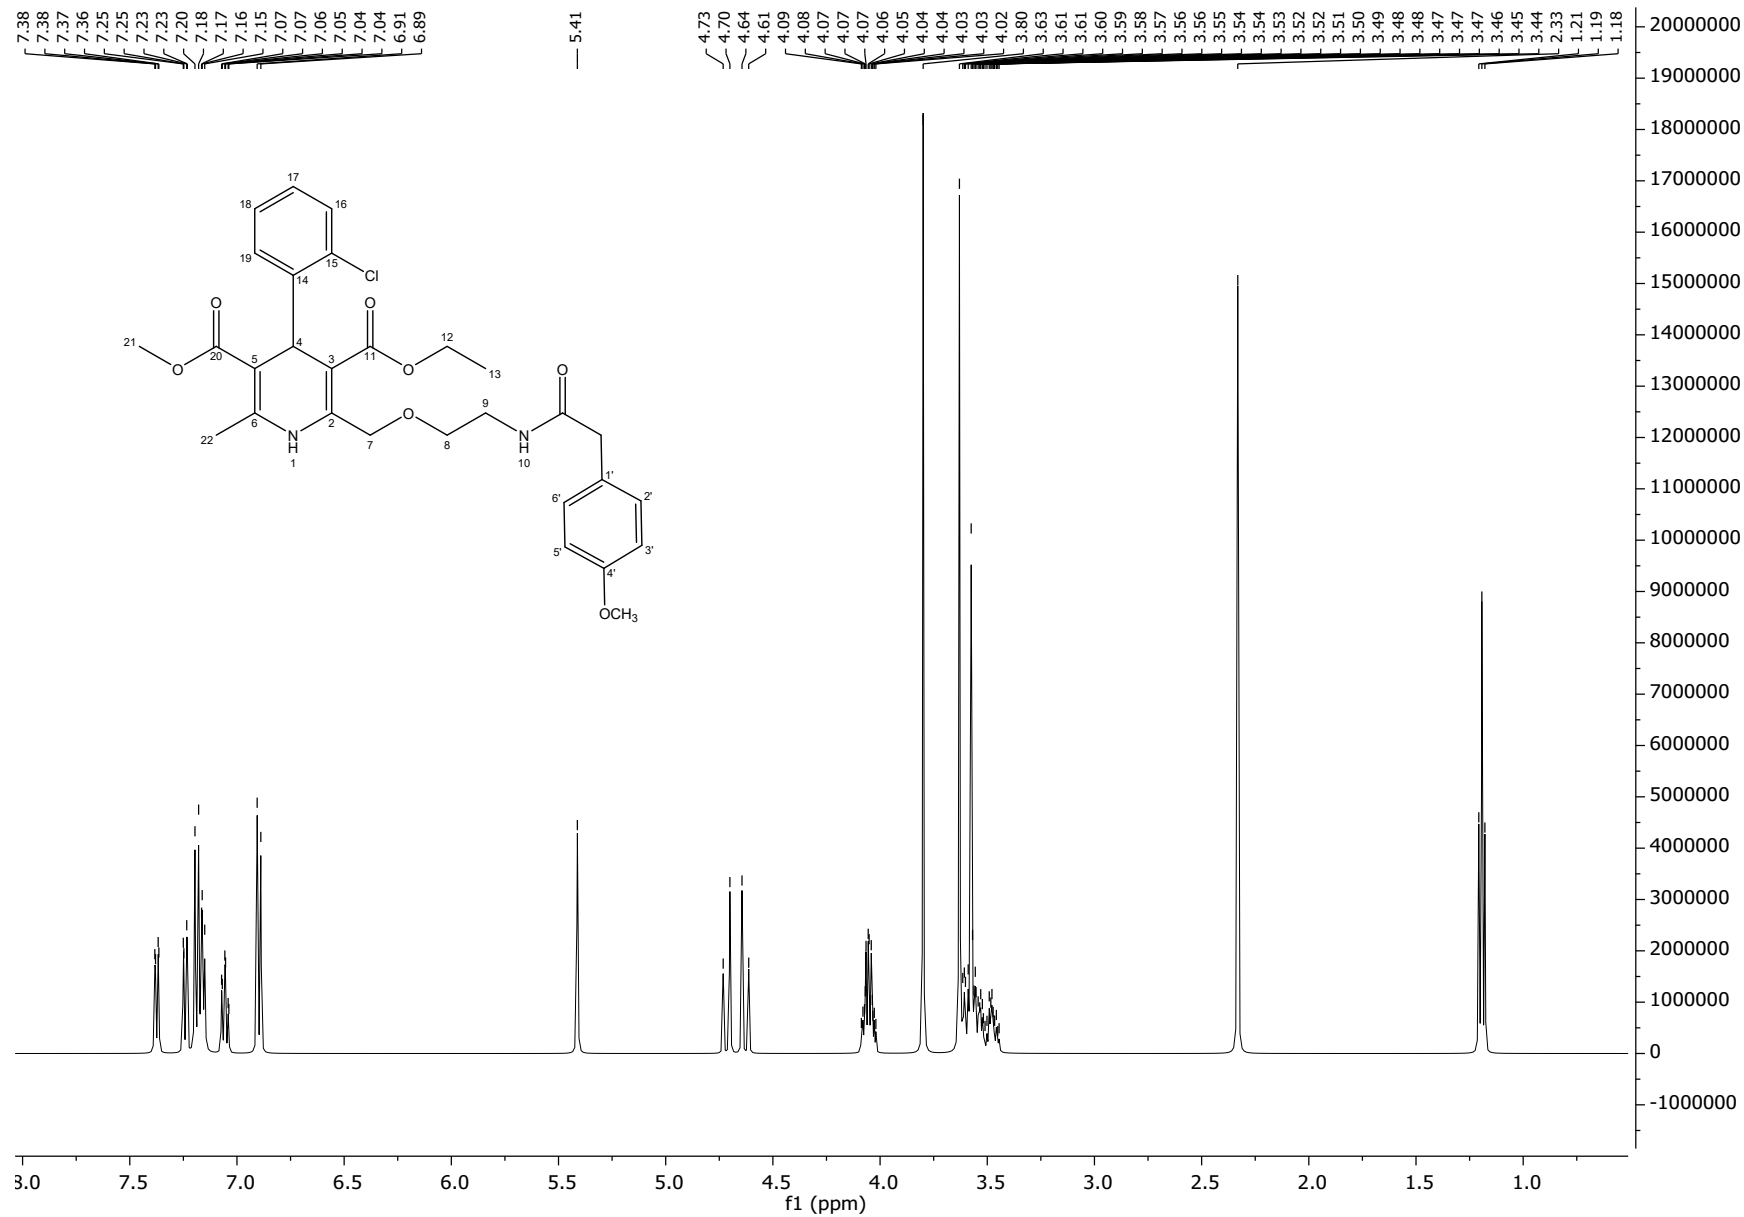

Compuesto 5e

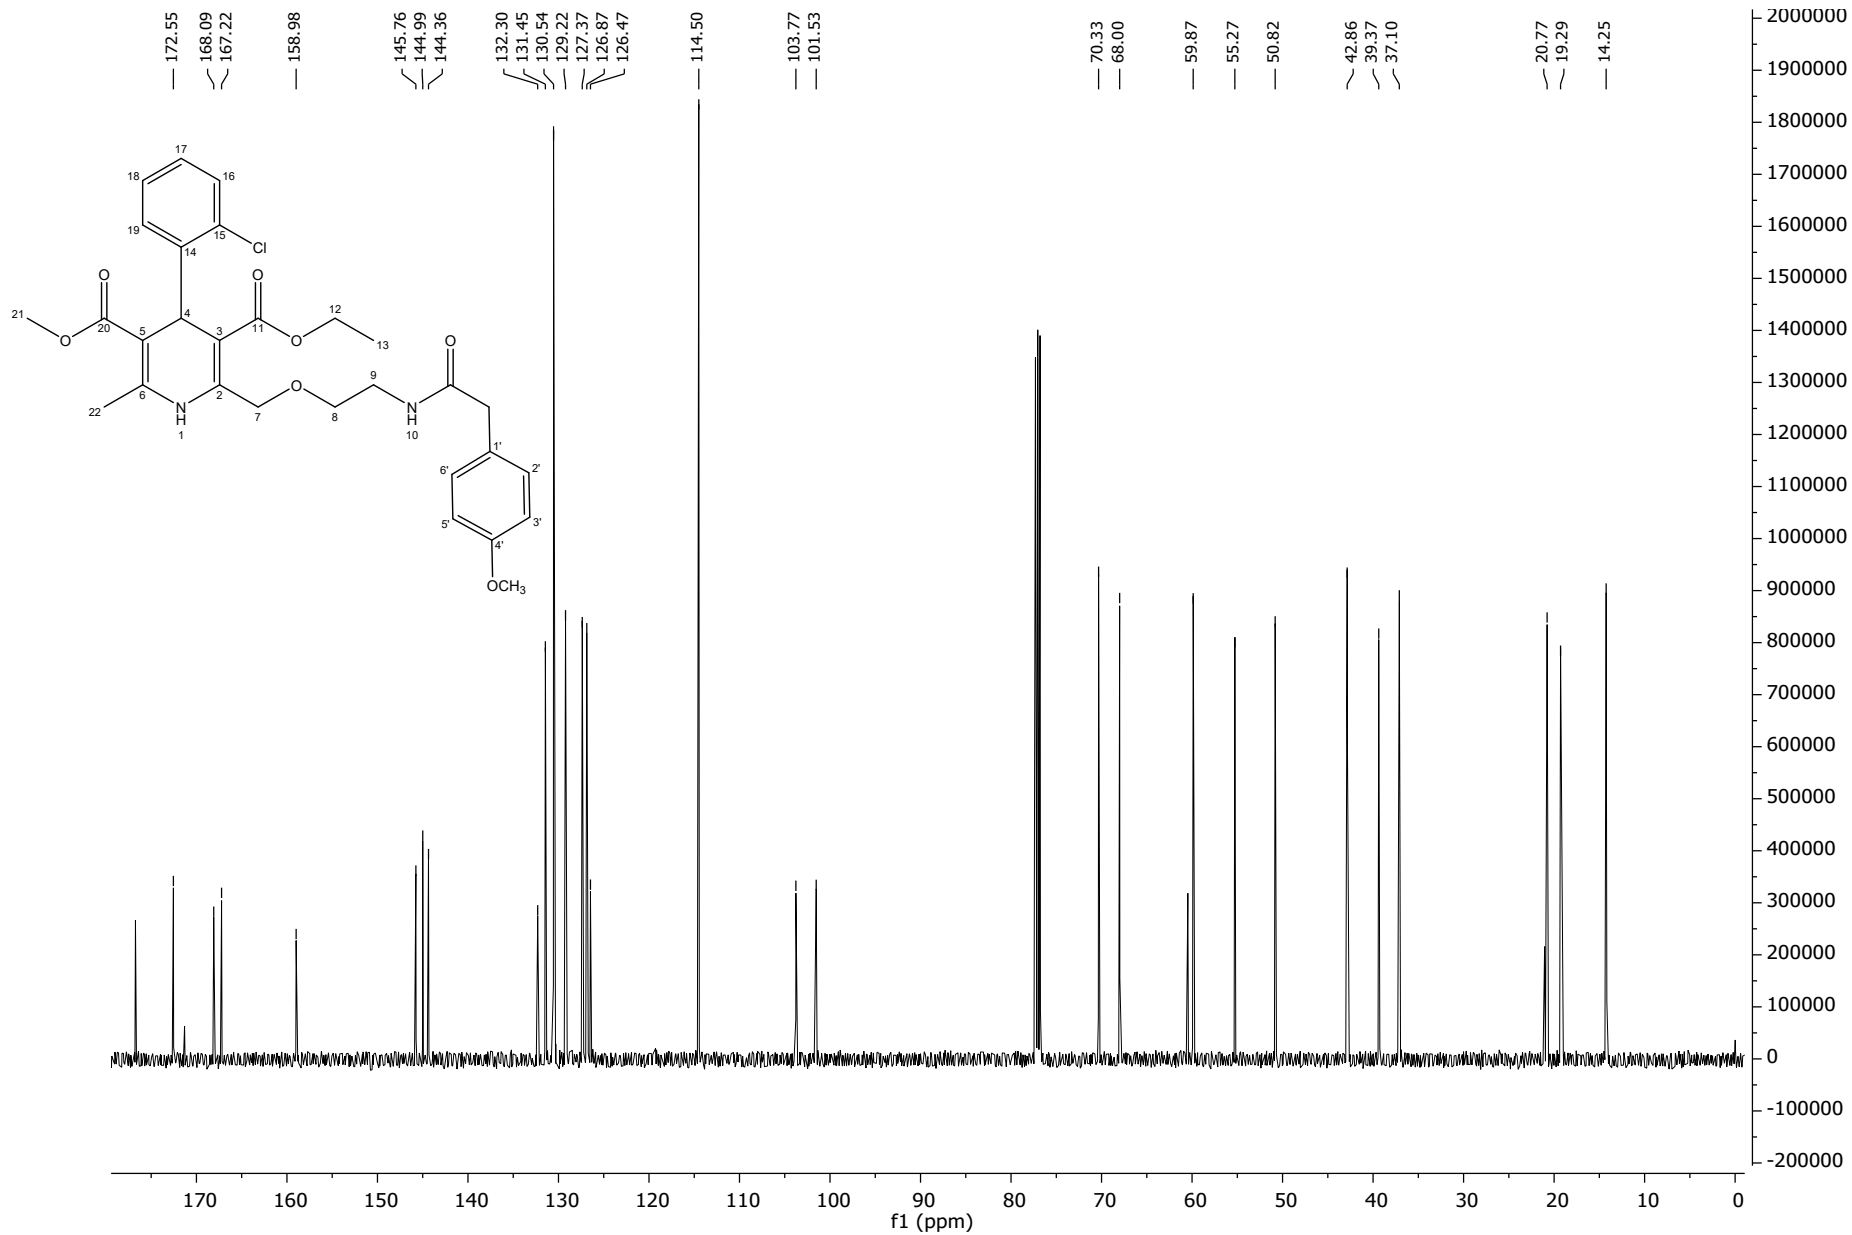

# Compound 5f

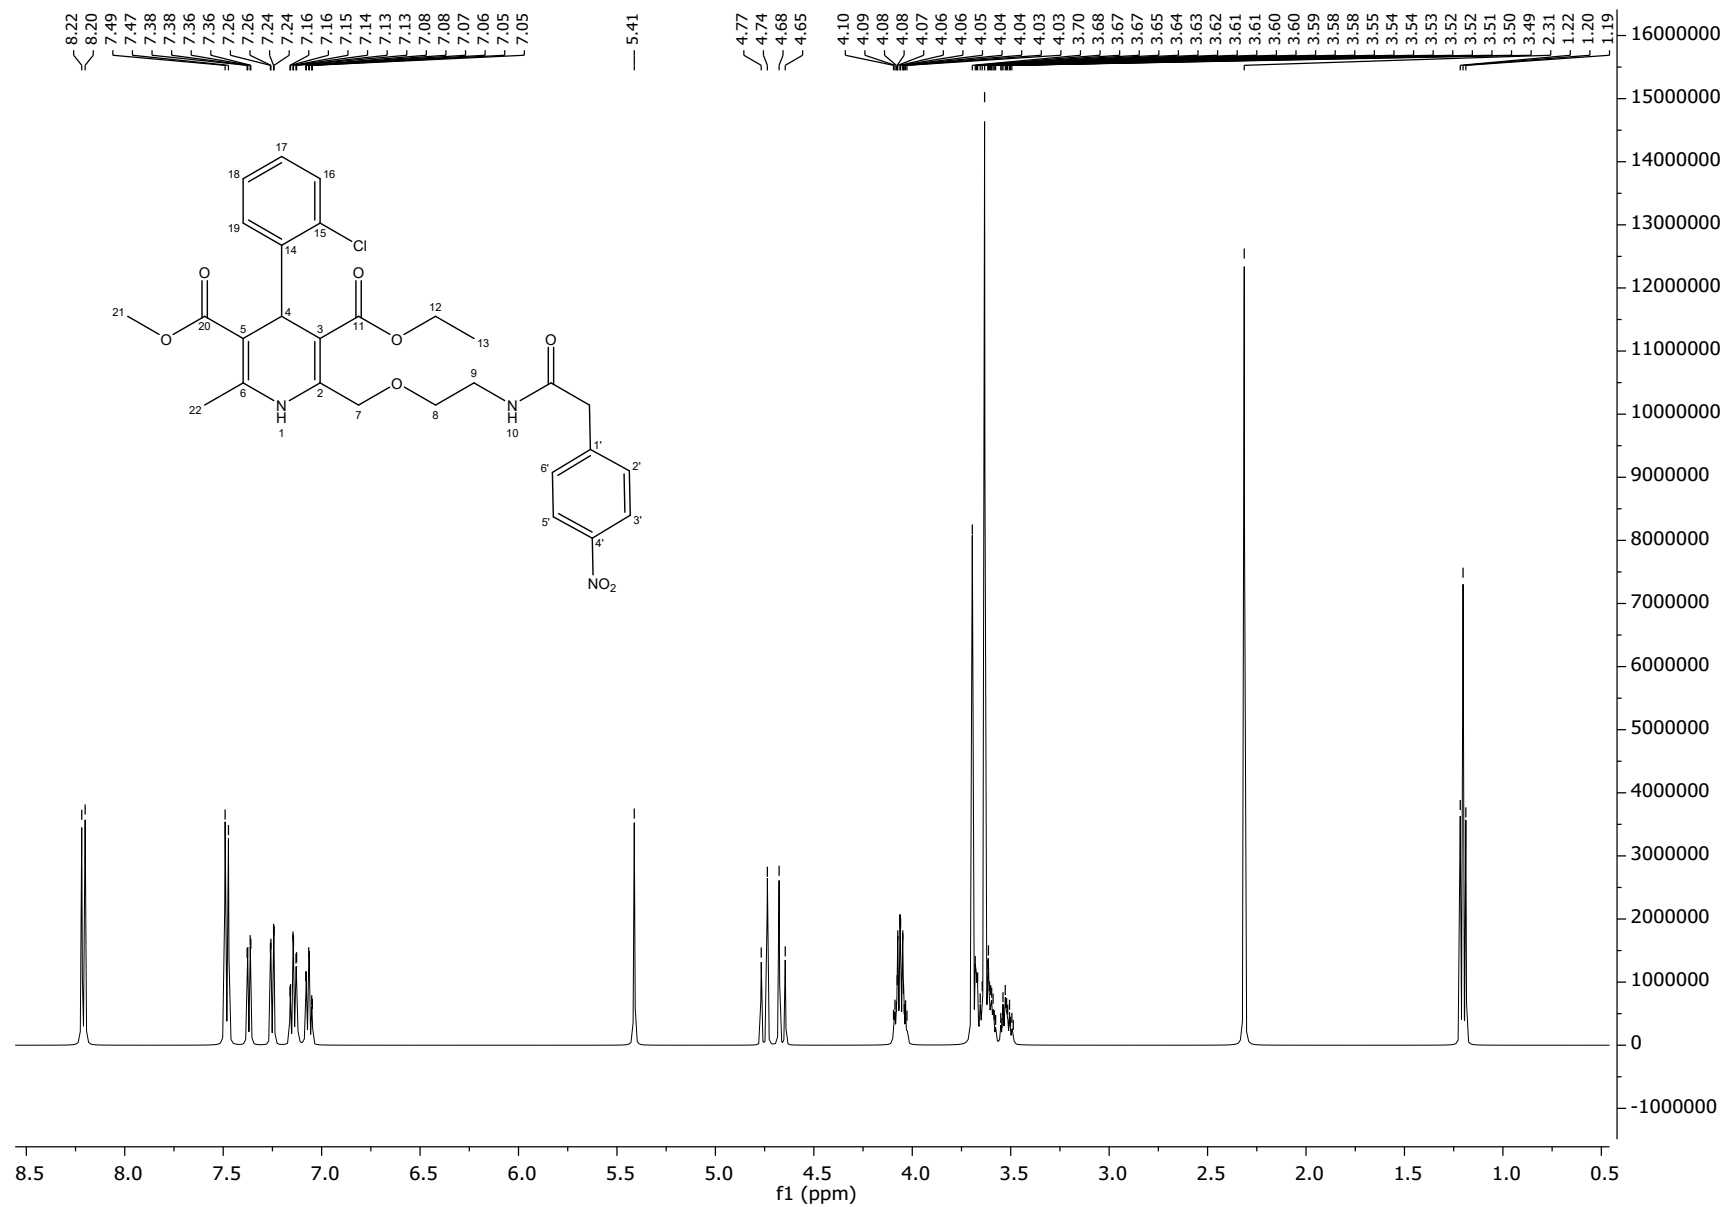



# Compuesto 5f

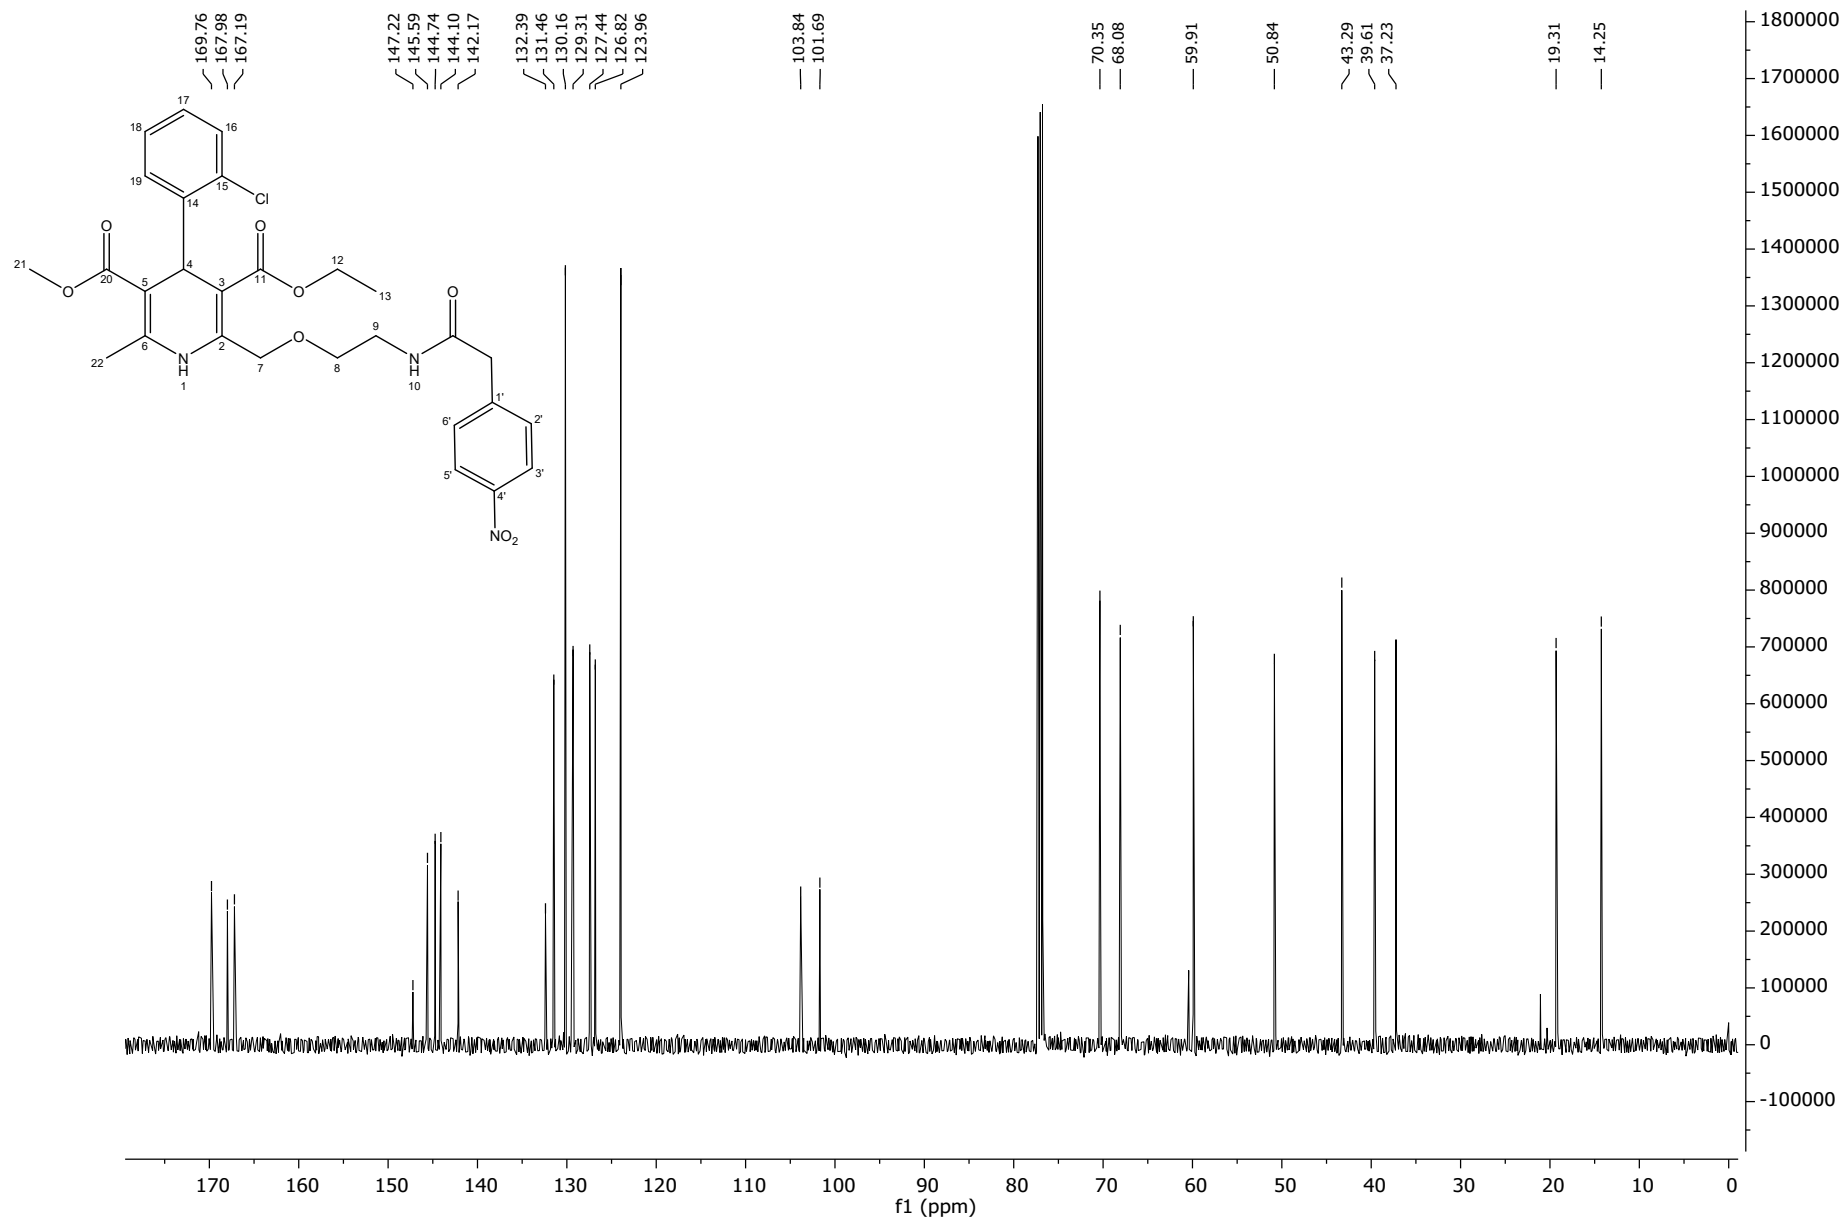

Supplement: d2ob02271k1.pdf [file d2ob02271k1.pdf]
